# Supplementary material
Source: PubMed Central journal article supplement (PMC8218333)
Supplement: NIHMS1705233-supplement-Appendix_S5.pdf [file NIHMS1705233-supplement-Appendix_S5.pdf]

## SUPPLEMENTARY APPENDIX 5: ACR/NPF 2018 Psoriatic Arthritis Guideline Evidence Report/Summary

### Introduction

#### Critical outcomes:

- Each table reports the summary of findings (SoF) from randomized trials reporting the critical outcomes. The critical outcomes were chosen at the scoping meeting in September 2016. For nearly all comparisons, the critical outcomes were percentage of patients achieving American College of Rheumatology criteria for 20% improvement (ACR20), Health Assessment Questionnaire Disability Index (HAQ-DI) score, percentage of patients with a 75% reduction in the psoriatic arthritis severity index score (PASI75) and the adverse effect of treatments, including serious infections. If studies did not separately report serious infections, then total infections were included in tables, but not considered a critical outcome. In a few instances, infections were one of the outcomes used in indirect comparisons as described under Evidence Summaries below. A few other critical outcomes were included for individual comparisons.
- It is important to note that serious infections are very rare (infections in general are uncommon/rare), and thus it is quite difficult to achieve a statistically significant difference between groups for this outcome in RCTs powered for efficacy outcomes.
- ACR20 and PASI75 are proportions; The HAQ-DI is typically a continuous outcome but was reported as a binary outcome in some studies (HAQ-DI MCID; % patients who achieved a minimum clinically important difference [0.35 for the HAQ-DI in PsA, but some studies used 0.3 as the minimum change]). Data from studies that reported only continuous HAQ-DI was converted to a binary outcome using the mean change and SD in each group to estimate the proportion of patients achieving a minimal clinically important difference in each group (this method assumes the change scores are normally distributed).
- Not every study identified examined all critical outcomes. Each outcome was analyzed separately.

#### Therapy groups:

- At our scoping meeting in Sept 2016, we decided upon the following therapy groups:
  - Oral small molecules: this includes methotrexate, sulfasalazine, cyclosporine, leflunomide and apremilast
  - TNF inhibitors (TNFi)
  - IL12/23 inhibitors (IL 12/23i)
  - IL17 inhibitors (IL17i)
  - Abatacept
  - Tofacitinib

## Systematic Literature Review

- For most of the outcomes, only randomized controlled trials (RCTs) were included. In some cases, observational studies were examined if relevant RCTs did not exist.

## Quality Assessment

- Quality assessment was performed separately for each outcome using the Grading of Recommendations Assessment, Development, and Evaluation (GRADE) system, which results in one of four possible evidence categories that reflect level of confidence in the effect estimate: high, moderate, low, and very low.
- Study design is the starting point for quality assessment: randomized controlled trials (RCTs) start at high quality and observational studies start at low quality.
- Five factors can lower the quality of evidence: risk of bias, inconsistency, indirectness, imprecision, and publication bias.
  - Risk of bias refers to limitations in study design or execution (e.g. lack of allocation concealment or blinding).
  - Inconsistency refers to unexplained heterogeneity in results of studies evaluating the same outcome.
  - Indirectness refers to lack of direct comparisons of interventions of interest (e.g. studies comparing drug A vs. placebo and drug B vs. placebo when the comparison of interest is drug A vs. drug B), lack of applicability in the interventions or populations being evaluated, or use of indirect (surrogate) outcome measures.
  - Imprecision refers to uncertainty in the estimate of effect due to very low numbers of patients or events and/or wide 95% confidence intervals that cross a clinical decision threshold (i.e. between recommending and not recommending treatment).
  - Publication bias refers to selective publication of studies that show greater treatment effects (i.e. negative studies are suppressed).
- Three factors can increase the quality of evidence: large effect, dose response, and residual confounding that would reduce the observed treatment effect
  - Large effect refers to an RR >2 or <0.5
  - Dose response gradient refers to an increase in treatment effect or harms observed with increasing medication dose
  - All plausible residual confounding would reduce the demonstrated effect or increase the effect, if no effect was observed
- Quality of evidence can vary from outcome to outcome. The final quality assessment for the PICO question is based on the critical outcome with the lowest quality assessment.

## Presentation of effects

- The treatment effects from binary (yes or no) outcomes are presented as relative effects and absolute effects.
- Relative effects capture the difference between intervention and control in relative terms. For example, a 10% event rate in controls

and a 5% event rate in the intervention represents a 50% relative risk reduction  $(((10 - 5) * 100) / 10)$

- The same difference represents a 5% absolute risk reduction (10% - 5% = 5%). In general, for patients, the absolute effect is the most important.

### **Evidence Summaries including Summary of Findings (= Tables under each PICO question, except some PICO questions for which no evidence was available)**

- Indirect comparisons: For PICO questions with a large evidence base, network meta-analysis was used to generate risk ratios (RR) from indirect comparison of different drug classes. Network meta-analysis pools all studies for each comparison of drug A to placebo and studies of drug B to placebo and then divides the pooled odds ratio (OR) for A vs. placebo by the pooled OR for B vs placebo to arrive at an indirect comparison for drug A vs drug B. For PICO questions that had a smaller evidence base (fewer studies), we performed drug-drug comparisons using the Bucher adjusted indirect comparison method, which is conceptually similar to the method used in the network meta-analyses.
- Direct comparisons are situations where trials directly compare drug A to drug B. There are very few trials with direct comparisons among patients with PsA but there are studies where direct comparisons are included for psoriasis and the PASI75 outcome.
- In the tables, when RR is specified, the first drug class (e.g. OSM vs. IL17i) is the reference drug class. Therefore a RR >1 for benefits indicates that the medication listed second is more beneficial; similarly a RR >1 for harms indicates the medication listed second is more harmful.

### **Interpreting the evidence**

- It's important to take into account the information presented specifically as it relates to the question of interest. For example, PICO 22 asks whether switching to an OSM improves outcomes, but the trials reviewed address either adding a new OSM or examine a subgroup of patients in the placebo group with continuation of OSM vs. without continuation. Thus, this evidence is indirect and appropriately gets rated down for indirectness, as shown under the column labeled "indirectness." The quality of evidence takes these sorts of things into account, and is appropriately rated as high, moderate, low or very low. This quality of evidence is key to the voting decisions.

### **Moving from evidence to recommendations**

- In GRADE, recommendations can be either strong or conditional. Generally, strong recommendations are restricted to high or moderate quality evidence. Low quality evidence almost invariably mandates a weak recommendation.
- There are, however, situations in which low quality evidence can lead to strong recommendations. For instance, if there is low quality evidence favoring an intervention but high quality evidence of important harm, the voting panel may make a strong recommendation against the intervention.

### **Bibliography of included studies**

- A complete list of studies included as evidence for this report appears at the end of this document, following PICO 78. Shorter lists of studies included for each PICO question with an evidence base appear at the end of the summaries for each question.

## Non-pharmacologic Interventions

### PICO 1. In adult patients with active PsA, what are the benefits and harms of exercise compared to no exercise?

Summary: The initial literature searches did not identify any studies that addressed this PICO question. However, a systematic review (SR) and meta-analysis[1] of 14 RCTs in patients with RA found that aerobic exercises were significantly more effective than non-aerobic interventions in improving quality of life (Standardized mean difference [SMD] 0.39,  $p < 0.0001$ ), HAQ score (SMD 0.24,  $p < 0.0009$ ), and VAS pain score (SMD 0.31,  $p=0.02$ ). Reduction in tender or swollen joint count did not show a statistically significant between-group difference (SMD 0.14,  $p=0.14$ ). The duration of the trials ranged from 2 to 104 weeks. The average quality of the studies as assessed in the SR was moderate, and the indirectness of the population lowers the overall quality of evidence to low.

An updated literature search in March 2018 identified an additional relevant study, an RCT by Roger-Silva et al.[2] that compared resistance exercise to a waiting-list control in 41 patients with PsA. This trial had not been previously reviewed by the guideline panel. The exercise group showed significant improvement in HAQ-S and BASDAI scores compared to the control group at 12 weeks. This study was small, not blinded and at best, moderate quality, so it does not change the overall quality of evidence.

Quality of evidence across all critical outcomes: Low

| Author, year | Study type    | Duration                                  | Population Description | Treatment given to relevant population                                | Results                                                                                                                                                                                                                                                                                                                                                                                                                                                                                                                                                          |
|--------------|---------------|-------------------------------------------|------------------------|-----------------------------------------------------------------------|------------------------------------------------------------------------------------------------------------------------------------------------------------------------------------------------------------------------------------------------------------------------------------------------------------------------------------------------------------------------------------------------------------------------------------------------------------------------------------------------------------------------------------------------------------------|
| Baillet 2010 | SR of 14 RCTs | Study duration ranged from 2 to 104 weeks | Patients with RA       | Aerobic exercise interventions vs. non-aerobic exercise or usual care | <p>Aerobic exercise significantly more effective than non-aerobic intervention for the following outcomes:<br/>                     Quality of life: SMD 0.39, 95% CI 0.23 to 0.56, <math>p &lt; 0.0001</math><br/>                     HAQ score: SMD 0.24, 95% CI 0.10 to 0.38, <math>p &lt; 0.0009</math><br/>                     VAS pain score: SMD 0.31, 95% CI 0.06 to 0.55, <math>p=0.02</math></p> <p>No statistically significant between-group difference for tender or swollen joint count: SMD 0.14, 95% CI -0.05 to 0.33, <math>p=0.14</math></p> |

SMD: standardized mean difference; SR: systematic review

### References

1. Baillet A, Zeboulon N, Gossec L, Combescure C, Bodin LA, Juvin R, et al. Efficacy of cardiorespiratory aerobic exercise in rheumatoid arthritis: meta-analysis of randomized controlled trials *Arthritis Care & Res* 2010; 62(7): 984–992.
2. Roger-Silva D, Natour J, Moreira E, Jennings F. A resistance exercise program improves functional capacity of patients with psoriatic arthritis: a randomized controlled trial. *Clin Rheumatol* 2018; 37: 389-395.

**PICO 2. In adult patients with active PsA, what are the benefits and harms of low impact exercise (e.g., tai chi, yoga, swimming) compared to high impact exercise (e.g., running)?**

Summary: The literature searches did not identify any studies that addressed this PICO question. While there are existing systematic reviews of exercise therapy in other arthritis populations (RA, spondyloarthritis), none of these includes studies with a high-impact exercise (running) arm.

Quality of evidence across all critical outcomes: Very low

**PICO 3. In adult patients with active PsA with active peripheral arthritis and/or enthesitis, what are the benefits and harms of physical therapy (PT) compared with no PT?**

Summary: The literature searches did not identify any studies that directly addressed this PICO question, or any systematic reviews that specifically evaluated PT in patients with other arthritic conditions (e.g. RA). However, PT interventions often overlap with exercise and occupational therapy interventions, so the evidence from PICO 1 and PICO 4 may be applicable to this PICO question. The evidence from both PICO 1 and 4 is noted as having serious risk of bias and serious indirectness, and since none of those interventions were specifically tailored to PT (they overlap with PT), that increases the indirectness to very serious. Therefore, the overall quality of evidence is very low.

Quality of evidence across all critical outcomes: Very low

**PICO 4. In adult patients with active PsA with active peripheral arthritis and/or enthesitis, what are the benefits and harms of occupational therapy (OT) compared with no OT?**

Summary: The literature searches did not identify any studies that directly addressed this PICO question. Two systematic reviews evaluated OT interventions in patients with RA. Siegel et al.[1] reviewed evidence from earlier SRs and individual RCTs for a range of interventions associated with OT, including various exercise interventions and psychoeducational interventions. Since exercise interventions were covered under PICO 1 and 2, this PICO focuses on psychoeducational interventions. This SR did not report effect sizes but found that psychological interventions generally had at least small effects on pain and function in patients with RA. Knittle et al.[2] performed meta-analyses of 27 RCTs that compared the efficacy of psychological self-regulatory interventions (CBT, patient education, stress management) to controls in patients with RA. These findings appear in the table below; they indicate a small but significant benefit of psychological interventions for the outcomes disability and physical activity at 2 to 14 months follow-up, but pain at follow-up was not significantly different between groups (although immediately post-treatment there was a significant between-group difference in pain reduction favoring the interventions). The average risk of bias in the studies

in these SRs appears to be serious, and since all studies included patients with RA they are limited by serious indirectness. Therefore, the overall quality of evidence is low.

Quality of evidence across all critical outcomes: Low

| Author, year | Study type    | Duration                                        | Population Description | Treatment given to relevant population                                                             | Results                                                                                                                                                                                                         |
|--------------|---------------|-------------------------------------------------|------------------------|----------------------------------------------------------------------------------------------------|-----------------------------------------------------------------------------------------------------------------------------------------------------------------------------------------------------------------|
| Knittle 2010 | SR of 27 RCTs | Study duration ranged from 2 weeks to 14 months | Patients with RA       | Psychological self-regulatory intervention (CBT, patient education, stress management) vs. control | Outcomes at follow-up (2-14 months post-treatment)<br>Pain: Hedges' g = 0.127 (p=0.069), no significant difference<br>Disability: Hedges' g = 0.145 (p=0.047)<br>Physical activity: Hedges' g = 0.361 (p=0.020) |

SMD: standardized mean difference; SR: systematic review

## References

1. Siegel S, Tencza M, Apodaca B, Poole J. Effectiveness of occupational therapy interventions for adults with rheumatoid arthritis: a systematic review. *Am J Occ Ther.* 2017; 71:1-11.
2. Knittle K, Maes S, De Gucht V. Psychological interventions for rheumatoid arthritis: examining the role of self-regulation with a systematic review and meta-analysis of randomized controlled trials. *Arth Care & Res.* 2010; 62:1460-72.

**PICO 5. In adult patients with active PsA who are overweight (e.g., BMI 25 and over), what are the benefits and harms of weight loss compared with no weight loss?**

Summary: This PICO question was addressed by direct comparisons in three studies [1-3] but indirect populations in two studies.[2,3] One study compared successful weight loss with unsuccessful weight loss in overweight PsA patients who followed a hypocaloric diet or a free-managed diet. Successful weight loss was defined as  $\geq 5\%$  weight loss.[1] Two studies evaluated the effect of weight loss in overweight psoriasis patients following a low-calorie diet.[2,3] Statistically significant differences were reported favoring weight loss over no or unsuccessful weight loss for efficacy outcomes (minimal disease activity [MDA], PASI75).

Quality of evidence across all critical outcomes: Low

| <b>Weight loss compared to no or unsuccessful weight loss for overweight PsA patients</b><br>Bibliography: PICO 5: Weight loss versus no weight loss for overweight PsA patients. |                      |               |              |                      |                  |                             |                                     |                  |                                                               |                                          |                                                            |
|-----------------------------------------------------------------------------------------------------------------------------------------------------------------------------------|----------------------|---------------|--------------|----------------------|------------------|-----------------------------|-------------------------------------|------------------|---------------------------------------------------------------|------------------------------------------|------------------------------------------------------------|
| Quality assessment                                                                                                                                                                |                      |               |              |                      |                  |                             | Summary of findings                 |                  |                                                               |                                          |                                                            |
| Nº of participants (studies)<br>Follow-up                                                                                                                                         | Risk of bias         | Inconsistency | Indirectness | Imprecision          | Publication bias | Overall quality of evidence | Study event rates (%)               |                  | Relative effect (95% CI)                                      | Anticipated absolute effects             |                                                            |
|                                                                                                                                                                                   |                      |               |              |                      |                  |                             | With no or unsuccessful weight loss | With Weight loss |                                                               | Risk with no or unsuccessful weight loss | Risk difference with Weight loss                           |
| <b>MDA, 24 weeks</b>                                                                                                                                                              |                      |               |              |                      |                  |                             |                                     |                  |                                                               |                                          |                                                            |
| 126 (1 RCT)                                                                                                                                                                       | serious <sup>a</sup> | not serious   | not serious  | serious <sup>e</sup> | none             | ⊕⊕○○<br>LOW                 | 12/52 (23.1%)                       | 37/74 (50.0%)    | <b>RR 2.17</b><br>(1.26 to 3.74)<br><b>Favors weight loss</b> | 231 per 1,000 (0.231)                    | <b>270 more per 1,000 (0.270)</b><br>(60 more to 632 more) |
| <b>PASI 75, 24 weeks</b>                                                                                                                                                          |                      |               |              |                      |                  |                             |                                     |                  |                                                               |                                          |                                                            |



## Weight loss compared to no or unsuccessful weight loss for overweight PsA patients

Bibliography: PICO 5: Weight loss versus no weight loss for overweight PsA patients.

| Quality assessment |                      |             |                      |             |      |             | Summary of findings |                    |                                                               |                          |                                                                          |
|--------------------|----------------------|-------------|----------------------|-------------|------|-------------|---------------------|--------------------|---------------------------------------------------------------|--------------------------|--------------------------------------------------------------------------|
| 323<br>(2 RCTs)    | serious <sup>b</sup> | not serious | serious <sup>c</sup> | not serious | none | ⊕⊕○○<br>LOW | 86/162<br>(53.1%)   | 132/161<br>(82.0%) | <b>RR 1.67</b><br>(1.09 to 2.54)<br><b>Favors weight loss</b> | 531 per 1,000<br>(0.531) | <b>299 more per 1,000 (0.299)</b><br>(212 more to 361 more) <sup>d</sup> |

**CI**: Confidence interval; **MDA**: Minimal disease activity; **RR**: Risk ratio

a. Patients/providers not blinded.

b. Randomization and allocation concealment methods not described; no blinding of patients/providers/assessors (1 study, Al-Mutairi 2014)

c. Population is indirect (psoriasis patients)

d. Absolute risk difference and confidence interval calculated based on the odds ratio.

e. Although the effect size is large, the study does not meet optimal information size.

Notes: Limitations described in 1 study[1] included 20% of patients receiving chronic treatment with oral hypoglycemic agents, possible selection bias resulting in a high prevalence of axial involvement in study population and low baseline PASI scores.

Working Group quality of evidence categories:

**High quality: We are very confident that the true effect lies close to that of the estimate of the effect**

**Moderate quality: We are moderately confident in the effect estimate: The true effect is likely to be close to the estimate of the effect, but there is a possibility that it is substantially different**

**Low quality: Our confidence in the effect estimate is limited: The true effect may be substantially different from the estimate of the effect**

**Very low quality: We have very little confidence in the effect estimate: The true effect is likely to be substantially different from the estimate of effect**

### References:

1. Di Minno MN, Peluso R, Iervolino S, Russolillo A, Lupoli R, Scarpa R, et al. Weight loss and achievement of minimal disease activity in patients with psoriatic arthritis starting treatment with tumour necrosis factor alpha blockers. *Ann Rheum Dis.* 2014;73(6):1157-1162.
2. Gisondi P, Del Giglio M, Di Francesco V, Zamboni M, Girolomoni G. Weight loss improves the response of obese patients with moderate-to-severe chronic plaque psoriasis to low-dose cyclosporine therapy: a randomized, controlled, investigator-blinded clinical trial. *Am J Clin Nutr.* 2008;88(5):1242-1247.
3. Al-Mutairi N, Nour T. The effect of weight reduction on treatment outcomes in obese patients with psoriasis on biologic therapy: a randomized controlled prospective trial. *Expert Opin Biol Ther.* 2014;14(6):749-756.

**PICO 6. In adult patients with active PsA who smoke, what are the benefits and harms of smoking cessation compared with no smoking cessation?**

Summary: The literature searches did not identify any studies that addressed this PICO question. Although specific benefits for PsA or arthritis symptoms are unclear, the general health benefits for smoking cessation are well established. A large RCT in a non-arthritic population found a significant mortality reduction at 14.5 years of follow-up for 5887 patients with asymptomatic airway obstruction who received a smoking cessation intervention compared to a usual care group (hazard ratio [HR] for mortality in usual care group 1.18, 95% CI 1.02 to 1.37).[1] A systematic review of 25 large U.S. and European cohort studies with 503,905 participants ≥60 years of age compared cardiovascular mortality of never smokers, former smokers, and current smokers. With never smokers as the reference group, the individual patient meta-analysis found that former smokers had a lower risk of cardiovascular mortality (HR 1.37, 95% CI 1.25 to 1.49) than current smokers (HR 2.07, 95% CI 1.82 to 2.36).[2] For both studies the only downgrade is for indirectness of the population.

Quality of evidence across all critical outcomes: Moderate

| Author, year    | Study type              | Duration                                                               | Population Description                                       | Treatment given to relevant population                                                                                                       | Results                                                                                                                                                                                                                                    |
|-----------------|-------------------------|------------------------------------------------------------------------|--------------------------------------------------------------|----------------------------------------------------------------------------------------------------------------------------------------------|--------------------------------------------------------------------------------------------------------------------------------------------------------------------------------------------------------------------------------------------|
| Anthonisen 2005 | RCT                     | 14.5 years                                                             | 5887 patients with asymptomatic airway obstruction           | 10-week smoking cessation intervention (with ipratropium or placebo inhaler) vs. usual care                                                  | Mortality: Hazard ratio (HR) 1.18 (95% CI 1.02 to 1.37) for usual care group compared to smoking cessation intervention group.                                                                                                             |
| Mons 2015       | SR of 25 cohort studies | Mean follow-up across 25 cohort studies ranged from 1.6 to 15.4 years. | 503,905 participants ≥60 years of age from 25 cohort studies | Not applicable. An individual patient meta-analysis compared cardiovascular mortality for never smokers, former smokers and current smokers. | With never smokers as the reference group, the individual patient meta-analysis found that former smokers had a lower risk of cardiovascular mortality (HR 1.37, 95% CI 1.25 to 1.49) than current smokers (HR 2.07, 95% CI 1.82 to 2.36). |

SR: systematic review

**References**

1. Anthonisen NR, Skeans MA, Wise RA, Manfreda J, Kanner RE, Connett JE; Lung Health Study Research Group. The effects of a smoking cessation intervention on 14.5-year mortality: a randomized clinical trial. *Arthritis Care & Res* 2010; 62(7): 984–992. *Ann Intern Med*. 2005 Feb 15;142(4):233-9.
2. Mons U, Müezzinler A, Gellert C, Schöttker B, Abnet CC, Bobak M, et al. Impact of smoking and smoking cessation on cardiovascular events and mortality among older adults: meta-analysis of individual participant data from prospective cohort studies of the CHANCES consortium. *BMJ*. 2015 Apr 20;350:h1551.

**PICO 7. In adult patients with active PsA, what are the benefits and harms of massage therapy compared with no massage therapy?**

Summary: The literature searches did not identify any direct studies that addressed this PICO question. One systematic review, involving seven RCTs with total 352 patients, assessed massage therapy (MT) in patients with OA and RA. The outcomes reported are improved range of motion (ROM), WOMAC functional subscale, grip strength in individuals with hand arthritis, walking function among those with OA of the knee, and adverse events. Five studies (310 participants) provided very low-level evidence that MT is superior to non-active therapy for improving range of motion (ROM). Three RCTs involving 233 participants, provided moderate-quality evidence that MT is superior to non-active therapies in improving WOMAC functional subscales. One study (22 participants) provided low-quality evidence that MT was superior to a non-active therapy for improving perceived grip strength in individuals with hand arthritis. Two RCTs with a low risk of bias, and one RCT with a high risk of bias, involving 233 participants, provided moderate quality evidence that MT is superior to a non-active comparator for improving walking function among those with OA of the knee. One study reported significantly faster 50-foot walk times among those receiving MT compared with usual care control participants, whereas another reported decreased time to walk 8 feet in MT recipients compared with participants in a waitlist control group. Adverse effects were reported in two studies: one reported no adverse effects related to the MT intervention, and another reported that one participant experienced an increase in discomfort and subsequently dropped out of the trial.

Quality of evidence across all critical outcomes: Very low

| Author, year   | Study type        | Duration                         | Population Description                | Treatment given to relevant population                                                                   | Results                                                                                                                                                                                                                                                                                                                                                                                                                                                                                                                                                                                                                                                                                                                                                                                                                                                                                                                                                                                                                                                                                                                                                                                                                                                                                                                                                                                        |
|----------------|-------------------|----------------------------------|---------------------------------------|----------------------------------------------------------------------------------------------------------|------------------------------------------------------------------------------------------------------------------------------------------------------------------------------------------------------------------------------------------------------------------------------------------------------------------------------------------------------------------------------------------------------------------------------------------------------------------------------------------------------------------------------------------------------------------------------------------------------------------------------------------------------------------------------------------------------------------------------------------------------------------------------------------------------------------------------------------------------------------------------------------------------------------------------------------------------------------------------------------------------------------------------------------------------------------------------------------------------------------------------------------------------------------------------------------------------------------------------------------------------------------------------------------------------------------------------------------------------------------------------------------------|
| Nelson L, 2017 | Systematic review | Seven RCTs between 1997 and 2015 | 352 participants with either OA or RA | Massage therapy. The total minutes of massage exposure for the trial period ranged from 120 to 960 mins. | Five studies (310 participants) provided very low-level evidence (downgraded because of risk of bias, imprecision, and inconsistency) that MT is superior to non-active therapy for improving range of motion (ROM). Two trials with a low risk of bias and one trial with a high risk of bias RCT involving 233 participants, provided moderate-quality evidence that MT is superior to nonactive therapies in improving WOMAC functional subscales. One study (22 participants) with a high risk of bias provided low-quality evidence (downgraded because of risk of bias and imprecision) that MT was superior to a nonactive therapy for improving perceived grip strength in individuals with hand arthritis. Two RCTs with a low risk of bias, and one RCT with a high risk of bias, involving 233 participants, provided moderate quality evidence (downgraded because of imprecision) that MT is superior to a nonactive comparator for improving walking function among those with OA of the knee. One study reported significantly faster 50-foot walk times among those receiving MT compared with usual care control participants, whereas another reported decreased time to walk 8 feet in MT recipients compared with participants in a wait list control group. Adverse effects were reported in two studies: one reported no adverse effects related to the MT intervention, |

| Author, year | Study type | Duration | Population Description | Treatment given to relevant population | Results                                                                                                                    |
|--------------|------------|----------|------------------------|----------------------------------------|----------------------------------------------------------------------------------------------------------------------------|
|              |            |          |                        |                                        | and another reported that one participant experienced an increase in discomfort and subsequently dropped out of the trial. |

References:

1. Nelson L., Churilla J. Massage Therapy for Pain and Function in Patients with Arthritis. A Systematic Review of Randomized Controlled Trials. Am J Phys Med Rehabil 2017;00:00–00

**PICO 8. In adult patients with active PsA, what are the benefits and harms of acupuncture compared with no acupuncture?**

Summary: The literature searches did not identify any studies that directly addressed this PICO question. One systematic review addressed acupuncture in older osteoarthritis (OA) patients to measure pain intensity (VAS) and functional mobility.[1] This systematic review included 12 trials (1763 participants) comparing acupuncture to sham acupuncture, no treatment or usual care. Most trials have unclear (64%) or high (9%) risk of bias. Acupuncture use was associated with significant reductions in pain intensity (MD -0.29, 95% CI -0.55 to -0.02, I2 0%, 10 trials, 1699 participants), and functional mobility (standardized MD -0.34, 95% CI -0.55 to -0.14, I2 70%, 9 trials, 1543 participants).

Quality of evidence across all critical outcomes: Very low

| <b>Acupuncture Compared to No Acupuncture for Pain Reduction in Osteoarthritis Patients</b>        |                      |                      |                           |             |                  |                             |                       |                  |                          |                              |                                                        |
|----------------------------------------------------------------------------------------------------|----------------------|----------------------|---------------------------|-------------|------------------|-----------------------------|-----------------------|------------------|--------------------------|------------------------------|--------------------------------------------------------|
| Bibliography: Acupuncture Compared to No acupuncture for Pain Reduction in Osteoarthritis Patients |                      |                      |                           |             |                  |                             |                       |                  |                          |                              |                                                        |
| Quality Assessment                                                                                 |                      |                      |                           |             |                  |                             | Summary of Findings   |                  |                          |                              |                                                        |
| Number of participants (studies)<br>Follow-up                                                      | Risk of bias         | Inconsistency        | Indirectness              | Imprecision | Publication bias | Overall quality of evidence | Study event rates (%) |                  | Relative effect (95% CI) | Anticipated absolute effects |                                                        |
|                                                                                                    |                      |                      |                           |             |                  |                             | With No acupuncture   | With Acupuncture |                          | Risk with No acupuncture     | Risk difference with Acupuncture                       |
| <b>VAS pain</b>                                                                                    |                      |                      |                           |             |                  |                             |                       |                  |                          |                              |                                                        |
| 1699 (10 RCTs)                                                                                     | serious <sup>a</sup> | not serious          | very serious <sup>b</sup> | not serious | none             | ⊕○○○<br>VERY LOW            | 829                   | 870              | -                        | -                            | MD <b>0.29 lower</b><br>(0.55 lower to 0.22 lower)     |
| <b>Functional mobility</b>                                                                         |                      |                      |                           |             |                  |                             |                       |                  |                          |                              |                                                        |
| 1543 (9 RCTs)                                                                                      | serious <sup>a</sup> | serious <sup>c</sup> | very serious <sup>b</sup> | not serious | none             | ⊕○○○<br>VERY LOW            | 792                   | 751              | -                        | -                            | SMD <b>0.34 SD lower</b><br>(0.55 lower to 0.14 lower) |

**CI:** Confidence interval; **MD:** Mean difference; **SMD:** Standardized mean difference

### *Explanations*

- a. Authors of systematic review assigned the risk of bias as serious
- b. Indirect population and outcomes
- c. High Chi-squared and I-squared values

### **References:**

1. Manyanga T. et al. Pain management with acupuncture in osteoarthritis: a systematic review and meta-analysis. BMC Complementary and Alternative Medicine 2014, 14:312

## Pharmacologic Interventions

### PICO 9. In adult patients with active PsA who are treatment-naïve, what are the benefits and harms of MTX vs. NSAID?

**Summary:** This PICO question was addressed directly by one observational study.[1] This retrospective matched study compared NSAIDs with oral MTX in 38 PsA patients. The intervention group were administered methotrexate (MTX) at a maximum weekly dose of 15-20 mg. Controls, who were matched by damage, actively inflamed joints, gender, and disease duration, received NSAIDs. No statistically significant difference was reported for one efficacy outcome ( $\geq 40\%$  improvement in actively inflamed joints) or adverse events (GI side effects, hepatic AEs) at 104 weeks, although there was imprecision in the efficacy estimate and very serious imprecision in the adverse event estimates.

Quality of evidence across all critical outcomes: Very low

| <b>MTX compared to NSAID for treatment-naïve PsA patients</b><br>Bibliography: PICO 9: MTX versus NSAID for treatment-naïve PsA patients. |                           |               |              |                      |                  |                             |                       |                  |                                   |                              |                                                             |
|-------------------------------------------------------------------------------------------------------------------------------------------|---------------------------|---------------|--------------|----------------------|------------------|-----------------------------|-----------------------|------------------|-----------------------------------|------------------------------|-------------------------------------------------------------|
| Quality assessment                                                                                                                        |                           |               |              |                      |                  |                             | Summary of findings   |                  |                                   |                              |                                                             |
| No of participants (studies)<br>Follow-up                                                                                                 | Risk of bias              | Inconsistency | Indirectness | Imprecision          | Publication bias | Overall quality of evidence | Study event rates (%) |                  | Relative effect (95% CI)          | Anticipated absolute effects |                                                             |
|                                                                                                                                           |                           |               |              |                      |                  |                             | With MTX              | With NSAID       |                                   | Risk with MTX                | Risk difference with NSAID                                  |
| <b><math>\geq 40\%</math> improvement in actively inflamed joints, 104 weeks</b>                                                          |                           |               |              |                      |                  |                             |                       |                  |                                   |                              |                                                             |
| 38<br>(1 observational study)                                                                                                             | very serious <sup>a</sup> | not serious   | not serious  | serious <sup>b</sup> | none             | ⊕○○○<br>VERY LOW            | 9/19<br>(47.4%)       | 10/19<br>(52.6%) | <b>RD 0.05</b><br>(-0.26 to 0.37) | 474 per 1,000<br>(0.474)     | <b>50 more per 1,000 (0.050)</b><br>(260 fewer to 370 more) |
| <b>GI side effects (not described), 104 weeks</b>                                                                                         |                           |               |              |                      |                  |                             |                       |                  |                                   |                              |                                                             |

## MTX compared to NSAID for treatment-naive PsA patients

Bibliography: PICO 9: MTX versus NSAID for treatment-naive PsA patients.

| Quality assessment                                       |                                 |             |             |                      |      |                  | Summary of findings |                |                                     |                 |                                                                        |
|----------------------------------------------------------|---------------------------------|-------------|-------------|----------------------|------|------------------|---------------------|----------------|-------------------------------------|-----------------|------------------------------------------------------------------------|
| 42<br>(1<br>observational<br>study)                      | very<br>serious<br><sup>a</sup> | not serious | not serious | serious <sup>b</sup> | none | ⊕○○○<br>VERY LOW | 2/23<br>(8.7%)      | 0/19<br>(0.0%) | <b>RR 0.24</b><br>(0.01 to<br>4.71) | 87 per<br>1,000 | <b>66 fewer<br/>per 1,000<br/>(0.066)</b> (86<br>fewer to<br>323 more) |
| <b>Hepatic adverse events (not described), 104 weeks</b> |                                 |             |             |                      |      |                  |                     |                |                                     |                 |                                                                        |
| 42<br>(1<br>observational<br>study)                      | very<br>serious<br><sup>a</sup> | not serious | not serious | serious <sup>b</sup> | none | ⊕○○○<br>VERY LOW | 2/23<br>(8.7%)      | 0/19<br>(0.0%) | <b>RR 0.24</b><br>(0.01 to<br>4.71) | 87 per<br>1,000 | <b>66 fewer<br/>per 1,000<br/>(0.066)</b> (86<br>fewer to<br>323 more) |

**CI:** Confidence interval; **RD:** Risk difference

a. Retrospective non-randomized design, no blinding, only 60% of MTX arm at follow-up

b. Small study with few patients and events and wide CI.

Working Group quality of evidence categories:

**High quality:** We are very confident that the true effect lies close to that of the estimate of the effect

**Moderate quality:** We are moderately confident in the effect estimate: The true effect is likely to be close to the estimate of the effect, but there is a possibility that it is substantially different

**Low quality:** Our confidence in the effect estimate is limited: The true effect may be substantially different from the estimate of the effect

**Very low quality:** We have very little confidence in the effect estimate: The true effect is likely to be substantially different from the estimate of effect

### References:

1. Abu-Shakra M, Gladman DD, Thorne JC, Long J, Gough J, Farewell VT. Longterm methotrexate therapy in psoriatic arthritis: clinical and radiological outcome. J Rheumatol. 1995;22(2):241-245.



**PICO 10. In adult patients with active PsA who are treatment-naïve, what are the benefits and harms of an Oral Small Molecule (OSM) vs. TNFi?**

Summary: This question was addressed by direct comparisons in 5 RCTs[1-5], and by indirect comparisons in 7 RCTs (in 9 publications).[6-14] Indirect populations (psoriasis patients) were evaluated in 2 studies.[4,5] Table 1 shows a comparison of MTX and infliximab (IFX) combination therapy with MTX monotherapy. Table 2 shows an indirect comparison of MTX and TNFi (adalimumab and etanercept) efficacy outcomes (ACR20, HAQ-DI) from placebo-controlled RCTs. Table 3 shows additional efficacy outcomes and adverse events from RCTs comparing OSMs (MTX or sulfasalazine) to placebo. Table 4 shows additional efficacy outcomes and adverse events from RCTs comparing TNFis (adalimumab or etanercept) to placebo. Lastly, Table 5 shows outcomes from two RCTs comparing TNFi (adalimumab or IFX) with MTX in psoriasis patients[4,5] The results from each table are summarized in the following paragraphs.

One RCT comparing MTX and IFX combination therapy (IFX given in 5 mg/kg infusions at weeks 0, 2, 6 and 14) with MTX monotherapy[1] reported statistically significant differences favoring combination therapy over monotherapy for all efficacy outcomes (ACR20, HAQ-DI, PASI75), but no statistically significant difference for adverse events (pulmonary tuberculosis, upper abdominal pain)(Table 1). Two observational studies comparing MTX with TNFi reported statistically significant differences favoring TNFi for some efficacy outcomes (absolute swollen joint count, modified HAQ-DI, absolute PASI score) but no significant difference for other efficacy outcomes (decrease in swollen joint count, absolute tender joint count, absolute HAQ score) and adverse events (liver toxicity, GI intolerance)(data not shown).[2,3]

One RCT of MTX versus placebo and three RCTs of TNFi (adalimumab or etanercept) vs. placebo reported common outcomes (ACR20, HAQ DI) that could be indirectly compared using the Bucher adjusted indirect comparison method (Table 2). TNFi showed significantly greater benefit than MTX for both outcomes. The MTX trial had a higher percentage of OSM-naïve patients (80%) compared to the TNFi trials (50-60%).

Four RCTs comparing OSM with placebo[6-9] reported no statistically significant difference for all efficacy outcomes (absolute tender joint count, absolute swollen joint count, change in tender joint count). Statistically significant differences favoring placebo were reported for one adverse event (GI intolerance). However, no statistically significant difference was reported between OSM and placebo for another adverse event (liver toxicity). A subgroup analyses by drug indicated a statistically significant difference favoring placebo over methotrexate for liver toxicity, but no statistically significant difference between sulfasalazine and placebo (Table 3).

Three RCTs (5 publications)[10-14] comparing TNFi with placebo reported statistically significant differences favoring TNFi over placebo for all efficacy outcomes (ACR20, HAQ-DI, PASI75), but no statistically significant difference for all adverse events (serious AEs, serious infections, upper respiratory tract infections)(Table 4).

Lastly, two RCTs comparing TNFi (adalimumab or IFX) with MTX in psoriasis patients[4,5] reported a statistically significant difference favoring TNFi over MTX for one skin outcome (measured by PASI75), but no statistically significant difference for two adverse outcomes (liver function test abnormality, serious infection)(Table 5).

Quality of evidence across all critical outcomes: Low

| <b>Table 1. MTX/IFX compared to MTX for treatment-naive PSA patients</b><br>Bibliography: PICO 10: OSM versus TNFi for treatment-naive PSA patients. |                      |               |              |             |                  |                             |                       |                  |                                                           |                              |                                                                         |
|------------------------------------------------------------------------------------------------------------------------------------------------------|----------------------|---------------|--------------|-------------|------------------|-----------------------------|-----------------------|------------------|-----------------------------------------------------------|------------------------------|-------------------------------------------------------------------------|
| Quality assessment                                                                                                                                   |                      |               |              |             |                  |                             | Summary of findings   |                  |                                                           |                              |                                                                         |
| No of participants (studies)<br>Follow-up                                                                                                            | Risk of bias         | Inconsistency | Indirectness | Imprecision | Publication bias | Overall quality of evidence | Study event rates (%) |                  | Relative effect (95% CI)                                  | Anticipated absolute effects |                                                                         |
|                                                                                                                                                      |                      |               |              |             |                  |                             | With MTX              | With MTX/IFX     |                                                           | Risk with MTX                | Risk difference with MTX/IFX                                            |
| <b>ACR20 response, 16 weeks</b>                                                                                                                      |                      |               |              |             |                  |                             |                       |                  |                                                           |                              |                                                                         |
| 99<br>(1 RCT)                                                                                                                                        | serious <sup>a</sup> | not serious   | not serious  | not serious | none             | ⊕⊕⊕○<br>MODERATE            | 32/48<br>(66.7%)      | 44/51<br>(86.3%) | <b>RR 1.29</b><br>(1.03 to 1.63)<br><b>Favors MTX/IFX</b> | 667 per 1,000<br>(0.667)     | <b>196 more per 1,000 (0.196)</b><br>(32 more to 278 more) <sup>d</sup> |
| <b>HAQ-DI<sup>b</sup>, 16 weeks</b>                                                                                                                  |                      |               |              |             |                  |                             |                       |                  |                                                           |                              |                                                                         |
| 110<br>(1 RCT)                                                                                                                                       | serious <sup>a</sup> | not serious   | not serious  | not serious | none             | ⊕⊕⊕○<br>MODERATE            | 33/54<br>(61.1%)      | 45/56<br>(80.4%) | <b>RR 1.31</b><br>(1.03 to 1.69)<br><b>Favors MTX/IFX</b> | 611 per 1,000<br>(0.611)     | <b>192 more per 1,000 (0.192)</b><br>(24 more to 295 more) <sup>d</sup> |
| <b>PASI75, 16 weeks</b>                                                                                                                              |                      |               |              |             |                  |                             |                       |                  |                                                           |                              |                                                                         |

**Table 1. MTX/IFX compared to MTX for treatment-naive PsA patients**

Bibliography: PICO 10: OSM versus TNFi for treatment-naive PsA patients.

| Quality assessment                        |                      |             |             |                      |      | Summary of findings |                           |                       |                                                               |                          |                                                                          |
|-------------------------------------------|----------------------|-------------|-------------|----------------------|------|---------------------|---------------------------|-----------------------|---------------------------------------------------------------|--------------------------|--------------------------------------------------------------------------|
| 69<br>(1 RCT)                             | serious <sup>a</sup> | not serious | not serious | not serious          | none | ⊕⊕⊕○<br>MODERATE    | 19/35<br>(54.3%)          | 33/34<br>(97.1%)      | <b>RR 1.79</b><br>(1.31 to 2.44)<br><br><b>Favors MTX/IFX</b> | 543 per 1,000<br>(0.543) | <b>428 more per 1,000 (0.428)</b><br>(259 more to 453 more) <sup>d</sup> |
| <b>Pulmonary tuberculosis<sup>e</sup></b> |                      |             |             |                      |      |                     |                           |                       |                                                               |                          |                                                                          |
| 111<br>(1 RCT)                            | serious <sup>a</sup> | not serious | not serious | serious <sup>c</sup> | none | ⊕⊕○○<br>LOW         | 1/57<br>(1.8%)<br>MTX/IFX | 0/54<br>(0.0%)<br>MTX | <b>RR 0.35</b><br>(0.01 to 8.45)                              | 18 per 1,000<br>MTX/IFX  | <b>12 fewer per 1,000 with MTX (0.012)</b><br>(18 fewer to 134 more)     |
| <b>Upper abdominal pain</b>               |                      |             |             |                      |      |                     |                           |                       |                                                               |                          |                                                                          |
| 111<br>(1 RCT)                            | serious <sup>a</sup> | not serious | not serious | serious <sup>c</sup> | none | ⊕⊕○○<br>LOW         | 3/54<br>(5.6%)            | 0/57<br>(0.0%)        | <b>RR 0.14</b><br>(0.01 to 2.56)                              | 56 per 1,000<br>(0.056)  | <b>48 fewer per 1,000 (0.048)</b><br>(55 fewer to 143 more)              |

CI: Confidence interval; RD: Risk difference; RR: Risk ratio

a. Unclear randomization and allocation concealment methods, no blinding

b. HAQ-DI measured as proportion of patients who achieved minimum clinically important improvement (>0.3 or 0.35 in different studies).

c. Single small study with very few events

d. Absolute risk difference and confidence interval calculated based on the odds ratio.

e. For pulmonary tuberculosis there were zero events in the MTX group, so we used MTX/IFX as the denominator in order to calculate the RR. So in this comparison "12 fewer per 1,000" means 12 fewer events in the MTX group compared to MTX/IFX.

**Table 2. MTX compared to TNFi for treatment-naive PsA patients**  
**Bibliography: PICO 10: OSM versus TNFi for treatment-naive PsA patients.**

| Quality assessment                                             |              |               |                      |             |                  |                             | Summary of findings |          |                                                                        |                              |                                                                            |
|----------------------------------------------------------------|--------------|---------------|----------------------|-------------|------------------|-----------------------------|---------------------|----------|------------------------------------------------------------------------|------------------------------|----------------------------------------------------------------------------|
| No of participants (studies)<br>Follow-up                      | Risk of bias | Inconsistency | Indirectness         | Imprecision | Publication bias | Overall quality of evidence |                     |          | Relative effect (95% CI)                                               | Anticipated absolute effects |                                                                            |
|                                                                |              |               |                      |             |                  |                             | With TNFi           | With MTX |                                                                        | Risk with TNFi               | Risk difference with MTX                                                   |
| <b>ACR20 response, Bucher adjusted indirect comparison</b>     |              |               |                      |             |                  |                             |                     |          |                                                                        |                              |                                                                            |
| 799 (4 RCTs)                                                   | not serious  | not serious   | serious <sup>a</sup> | not serious | none             | ⊕⊕⊕○<br>MODERATE            | TNFi                | MTX      | <b>OR<sup>b</sup> 0.24</b><br>(0.07 to 0.72)<br><br><b>Favors TNFi</b> | 596 per 1,000 (0.596)        | <b>335 fewer per 1,000 (0.335)</b><br>(502 fewer to 58 fewer) <sup>d</sup> |
| <b>HAQ-DI<sup>c</sup>, Bucher adjusted indirect comparison</b> |              |               |                      |             |                  |                             |                     |          |                                                                        |                              |                                                                            |
| 799 (4 RCTs)                                                   | not serious  | not serious   | serious <sup>a</sup> | not serious | none             | ⊕⊕⊕○<br>MODERATE            | TNFi                | MTX      | <b>RR 0.63</b><br>(0.42 to 0.95)<br><br><b>Favors TNFi</b>             | 596 per 1,000 (0.596)        | <b>221 fewer per 1,000 (0.221)</b><br>(346 fewer to 30 fewer)              |

**CI:** Confidence interval; **RR:** Risk ratio

- Indirect comparison of placebo-controlled trials
- Study of MTX reported finding as OR, so indirect comparison had to use OR.
- HAQ-DI measured as proportion of patients who achieved minimum clinically important improvement (>0.3 or 0.35 in different studies).
- Absolute risk difference and confidence interval calculated based on the odds ratio.

**Table 3. OSM compared to placebo for treatment-naive PsA patients**

Bibliography: PICO 10: OSM versus TNFi for treatment-naive PsA patients.

| Quality assessment                                                 |              |               |                      |                      |                  |                             | Summary of findings   |          |                          |                              |                                                     |
|--------------------------------------------------------------------|--------------|---------------|----------------------|----------------------|------------------|-----------------------------|-----------------------|----------|--------------------------|------------------------------|-----------------------------------------------------|
| № of participants (studies)<br>Follow-up                           | Risk of bias | Inconsistency | Indirectness         | Imprecision          | Publication bias | Overall quality of evidence | Study event rates (%) |          | Relative effect (95% CI) | Anticipated absolute effects |                                                     |
|                                                                    |              |               |                      |                      |                  |                             | With placebo          | With OSM |                          | Risk with placebo            | Risk difference with OSM                            |
| <b>Absolute tender joint count (8-12 weeks)</b>                    |              |               |                      |                      |                  |                             |                       |          |                          |                              |                                                     |
| 245 (2 RCTs)                                                       | not serious  | not serious   | serious <sup>a</sup> | serious <sup>b</sup> | none             | ⊕⊕○○<br>LOW                 | 126                   | 119      | -                        | -                            | MD <b>3.31 lower</b><br>(9.11 lower to 2.49 higher) |
| <b>Absolute swollen joint count (8-12 weeks)</b>                   |              |               |                      |                      |                  |                             |                       |          |                          |                              |                                                     |
| 245 (2 RCTs)                                                       | not serious  | not serious   | serious <sup>a</sup> | serious <sup>b</sup> | none             | ⊕⊕○○<br>LOW                 | 126                   | 119      | -                        | -                            | MD <b>1.36 lower</b><br>(5.47 lower to 2.74 higher) |
| <b>Change in tender joint count (53 joints, week 24)</b>           |              |               |                      |                      |                  |                             |                       |          |                          |                              |                                                     |
| 108 (1 RCT)                                                        | not serious  | not serious   | serious <sup>a</sup> | serious <sup>b</sup> | none             | ⊕⊕○○<br>LOW                 | 59                    | 49       | -                        | -                            | MD <b>0.8 lower</b><br>(2.17 lower to 0.57 higher)  |
| <b>GI intolerance (nausea, vomiting, abdominal pain, diarrhea)</b> |              |               |                      |                      |                  |                             |                       |          |                          |                              |                                                     |

**Table 3. OSM compared to placebo for treatment-naive PSA patients**

Bibliography: PICO 10: OSM versus TNFi for treatment-naive PSA patients.

| Quality assessment                                           |             |             |                      |                      |      | Summary of findings |                   |                   |                                                               |                          |                                                            |
|--------------------------------------------------------------|-------------|-------------|----------------------|----------------------|------|---------------------|-------------------|-------------------|---------------------------------------------------------------|--------------------------|------------------------------------------------------------|
| 392<br>(4 RCTs)                                              | not serious | not serious | serious <sup>a</sup> | not serious          | none | ⊕⊕⊕○<br>MODERATE    | 30/205<br>(14.6%) | 67/187<br>(35.8%) | <b>RR 2.38</b><br>(1.64 to 3.46)<br><br><b>Favors placebo</b> | 146 per 1,000<br>(0.146) | <b>202 more per 1,000 (0.202)</b><br>(94 more to 360 more) |
| <b>Liver toxicity<sup>c</sup> - Methotrexate vs placebo</b>  |             |             |                      |                      |      |                     |                   |                   |                                                               |                          |                                                            |
| 221<br>(1 RCT)                                               | not serious | not serious | serious <sup>a</sup> | not serious          | none | ⊕⊕⊕○<br>MODERATE    | 2/112<br>(1.8%)   | 12/109<br>(11.0%) | <b>RD 0.09</b><br>(0.03 to 0.16)<br><br><b>Favors placebo</b> | 18 per 1,000<br>(0.018)  | <b>90 more per 1,000 (0.090)</b><br>(30 more to 160 more)  |
| <b>Liver toxicity<sup>d</sup> - Sulfasalazine vs placebo</b> |             |             |                      |                      |      |                     |                   |                   |                                                               |                          |                                                            |
| 117<br>(1 RCT)                                               | not serious | not serious | serious <sup>a</sup> | serious <sup>b</sup> | none | ⊕⊕○○<br>LOW         | 1/64<br>(1.6%)    | 0/53<br>(0.0%)    | <b>RR 0.40</b><br>(0.02 to 9.65)                              | 16 per 1,000<br>(0.016)  | <b>9 fewer per 1,000 (0.009)</b><br>(15 fewer to 135 more) |

CI: Confidence interval; MD: Mean difference; RD: Risk difference; RR: Risk ratio

a. Indirect comparison

b. Wide 95% CI crosses line of no difference

c. Abnormal liver function tests, but study did not define cutoff.

d. Increased ASAT and ALAT (x 3 compared to baseline) after 1 month. No concomitant NSAID.

**Table 4. TNFi compared to Placebo for treatment-naive PSA patients**

Bibliography: PICO 10: OSM versus TNFi for treatment-naive PSA patients.

| Quality assessment                                |              |               |                      |                      |                  |                             | Summary of findings   |                   |                                                            |                              |                                                            |
|---------------------------------------------------|--------------|---------------|----------------------|----------------------|------------------|-----------------------------|-----------------------|-------------------|------------------------------------------------------------|------------------------------|------------------------------------------------------------|
| № of participants (studies)<br>Follow-up          | Risk of bias | Inconsistency | Indirectness         | Imprecision          | Publication bias | Overall quality of evidence | Study event rates (%) |                   | Relative effect (95% CI)                                   | Anticipated absolute effects |                                                            |
|                                                   |              |               |                      |                      |                  |                             | With Placebo          | With TNFi         |                                                            | Risk with Placebo            | Risk difference with TNFi                                  |
| <b>PASI 75</b>                                    |              |               |                      |                      |                  |                             |                       |                   |                                                            |                              |                                                            |
| 326<br>(3 RCTs)                                   | not serious  | not serious   | serious <sup>a</sup> | not serious          | none             | ⊕⊕⊕○<br>MODERATE            | 11/161<br>(6.8%)      | 80/165<br>(48.5%) | <b>RD 0.37</b><br>(0.09 to 0.65)<br><br><b>Favors TNFi</b> | 68 per 1,000<br>(0.068)      | <b>370 more per 1,000 (0.370)</b><br>(90 more to 650 more) |
| <b>Serious Infections</b>                         |              |               |                      |                      |                  |                             |                       |                   |                                                            |                              |                                                            |
| 518<br>(2 RCTs)                                   | not serious  | not serious   | serious <sup>a</sup> | not serious          | none             | ⊕⊕⊕○<br>MODERATE            | 2/266<br>(0.8%)       | 1/252<br>(0.4%)   | <b>RD -0.004</b><br>(-0.02 to 0.01)                        | 8 per 1,000<br>(0.008)       | <b>4 fewer per 1,000 (0.004)</b><br>(20 fewer to 10 more)  |
| <b>Upper respiratory tract infection 12 weeks</b> |              |               |                      |                      |                  |                             |                       |                   |                                                            |                              |                                                            |
| 60<br>(1 RCT)                                     | not serious  | not serious   | serious <sup>a</sup> | serious <sup>b</sup> | none             | ⊕⊕○○<br>LOW                 | 17/30<br>(56.7%)      | 17/30<br>(56.7%)  | <b>RR 1.00</b><br>(0.64 to 1.56)                           | 567 per 1,000<br>(0.567)     | <b>0 fewer per 1,000</b><br>(204 fewer to 317 more)        |

**CI:** Confidence interval; **RR:** Risk ratio

a. Indirect comparison

b. Wide CIs

**Table 5. TNFi compared to OSM for treatment-naive psoriasis patients**

Bibliography: PICO 10: OSM versus TNFi for treatment-naive PsA patients.

| Quality assessment                                                      |                      |               |                      |             |                  |                             | Summary of findings   |                    |                                                        |                              |                                                             |
|-------------------------------------------------------------------------|----------------------|---------------|----------------------|-------------|------------------|-----------------------------|-----------------------|--------------------|--------------------------------------------------------|------------------------------|-------------------------------------------------------------|
| № of participants (studies)<br>Follow-up                                | Risk of bias         | Inconsistency | Indirectness         | Imprecision | Publication bias | Overall quality of evidence | Study event rates (%) |                    | Relative effect (95% CI)                               | Anticipated absolute effects |                                                             |
|                                                                         |                      |               |                      |             |                  |                             | With OSM (Psoriasis)  | With TNFi          |                                                        | Risk with OSM (Psoriasis)    | Risk difference with TNFi                                   |
| <b>PASI-75, 16 weeks</b>                                                |                      |               |                      |             |                  |                             |                       |                    |                                                        |                              |                                                             |
| 1086<br>(2 RCTs)                                                        | serious <sup>a</sup> | not serious   | serious <sup>b</sup> | not serious | none             | ⊕⊕○○<br>LOW                 | 129/325<br>(39.7%)    | 594/761<br>(78.1%) | <b>RR 1.98</b><br>(1.66 to 2.36)<br><b>Favors TNFi</b> | 397 per 1,000<br>(0.397)     | <b>389 more per 1,000 (0.389)</b><br>(262 more to 540 more) |
| <b>Liver function test abnormality<sup>c</sup> - Infliximab vs. MTX</b> |                      |               |                      |             |                  |                             |                       |                    |                                                        |                              |                                                             |
| 860<br>(1 RCT)                                                          | serious <sup>d</sup> | not serious   | serious <sup>b</sup> | not serious | none             | ⊕⊕○○<br>LOW                 | 3/211<br>(1.4%)       | 14/649<br>(2.2%)   | <b>RD 0.01</b><br>(-0.01 to 0.03)                      | 14 per 1,000<br>(0.014)      | <b>10 more per 1,000 (0.010)</b><br>(10 fewer to 30 more)   |
| <b>Liver function test abnormality<sup>e</sup> - Adalimumab vs. MTX</b> |                      |               |                      |             |                  |                             |                       |                    |                                                        |                              |                                                             |
| 217<br>(1 RCT)                                                          | not serious          | not serious   | serious <sup>b</sup> | not serious | none             | ⊕⊕⊕○<br>MODERATE            | 10/110<br>(9.1%)      | 2/107<br>(1.9%)    | <b>RR 0.21</b><br>(0.05 to 0.92)<br><b>Favors ADA</b>  | 91 per 1,000<br>(0.091)      | <b>72 fewer per 1,000 (0.072)</b><br>(86 fewer to 7 fewer)  |



**Table 5. TNFi compared to OSM for treatment-naive psoriasis patients**

Bibliography: PICO 10: OSM versus TNFi for treatment-naive PsA patients.

| Quality assessment       |                      |             |                      |             |      | Summary of findings |                 |                  |                                                 |                            |                                                                     |
|--------------------------|----------------------|-------------|----------------------|-------------|------|---------------------|-----------------|------------------|-------------------------------------------------|----------------------------|---------------------------------------------------------------------|
| <b>Serious Infection</b> |                      |             |                      |             |      |                     |                 |                  |                                                 |                            |                                                                     |
| 1077<br>(2 RCTs)         | serious <sup>a</sup> | not serious | serious <sup>b</sup> | not serious | none | ⊕⊕○○<br>LOW         | 4/321<br>(1.2%) | 10/756<br>(1.3%) | <b>RD</b><br><b>0.001</b><br>(-0.01 to<br>0.02) | 12 per<br>1,000<br>(0.012) | <b>1 more per<br/>1,000<br/>(0.001)</b><br>(10 fewer to<br>20 more) |

CI: Confidence interval; RD: Risk difference; RR: Risk ratio

a. 1 RCT (Barker 2011) open label, ITT conducted

b. Indirect population (Psoriasis patients)

c. Elevated liver enzymes (study did not report cutoffs for abnormal test results)

d. Open label, ITT conducted

e. Alanine aminotransferase > 2.5 times the upper normal limit (ULN), aspartate aminotransferase > 2.5 times the ULN, total bilirubin >1.5 times the ULN, or γ-Glutamyltransferase elevation

Working Group quality of evidence categories:

**High quality: We are very confident that the true effect lies close to that of the estimate of the effect**

**Moderate quality: We are moderately confident in the effect estimate: The true effect is likely to be close to the estimate of the effect, but there is a possibility that it is substantially different**

**Low quality: Our confidence in the effect estimate is limited: The true effect may be substantially different from the estimate of the effect**

**Very low quality: We have very little confidence in the effect estimate: The true effect is likely to be substantially different from the estimate of effect**

## References:

1. Baranauskaite A, Raffayova H, Kungurov NV, Kubanova A, Venalis A, Helmle L, et al. Infliximab plus methotrexate is superior to methotrexate alone in the treatment of psoriatic arthritis in methotrexate-naive patients: the RESPOND study. *Ann Rheum Dis.* 2012;71(4):541-548.
2. Heiberg MS, Kaufmann C, Rodevand E, Mikkelsen K, Koldingsnes W, Mowinckel P, et al. The comparative effectiveness of anti-TNF therapy and methotrexate in patients with psoriatic arthritis: 6 month results from a longitudinal, observational, multicentre study. *Ann Rheum Dis.* 2007;66(8):1038-1042.
3. Eder L, Thavaneswaran A, Chandran V, Gladman DD. Tumour necrosis factor alpha blockers are more effective than methotrexate in the inhibition of radiographic joint damage progression among patients with psoriatic arthritis. *Ann Rheum Dis.* 2014;73(6):1007-1011.

4. Barker J, Hoffmann M, Wozel G, Ortonne JP, Zheng H, van Hoogstraten H, et al. Efficacy and safety of infliximab vs. methotrexate in patients with moderate-to-severe plaque psoriasis: results of an open-label, active-controlled, randomized trial (RESTORE1). *Br J Dermatol.* 2011;165(5):1109-1117.
5. Saurat JH, Stingl G, Dubertret L, Papp K, Langley RG, Ortonne JP, et al. Efficacy and safety results from the randomized controlled comparative study of adalimumab vs. methotrexate vs. placebo in patients with psoriasis (CHAMPION). *Br J Dermatol.* 2008;158(3):558-566.
6. Kingsley GH, Kowalczyk A, Taylor H, Ibrahim F, Packham JC, McHugh NJ, et al. A randomized placebo-controlled trial of methotrexate in psoriatic arthritis. *Rheumatology (Oxford).* 2012;51(8):1368-1377.
7. Gupta AK, Grober JS, Hamilton TA, Ellis CN, Siegel MT, Voorhees JJ, et al. Sulfasalazine therapy for psoriatic arthritis: a double blind, placebo controlled trial. *J Rheumatol.* 1995;22(5):894-898.
8. Combe B, Goupille P, Kuntz JL, Tebib J, Liote F, Bregeon C. Sulphasalazine in psoriatic arthritis: a randomized, multicentre, placebo-controlled study. *Br J Rheumatol.* 1996;35(7):664-668.
9. Farr M, Kitas GD, Waterhouse L, Jubb R, Felix-Davies D, Bacon PA. Sulphasalazine in psoriatic arthritis: a double-blind placebo-controlled study. *Br J Rheumatol.* 1990;29(1):46-49.
10. Mease PJ, Gladman DD, Ritchlin CT, Ruderman EM, Steinfeld SD, Choy EH, et al. Adalimumab for the treatment of patients with moderately to severely active psoriatic arthritis: results of a double-blind, randomized, placebo-controlled trial. *Arthritis Rheum.* 2005;52(10):3279-3289.
11. Gladman DD, Mease PJ, Cifaldi MA, Perdok RJ, Sasso E, Medich J. Adalimumab improves joint-related and skin-related functional impairment in patients with psoriatic arthritis: patient-reported outcomes of the Adalimumab Effectiveness in Psoriatic Arthritis Trial. *Ann Rheum Dis.* 2007;66(2):163-168.
12. Mease PJ, Kivitz AJ, Burch FX, Siegel EL, Cohen SB, Ory P, et al. Etanercept treatment of psoriatic arthritis: safety, efficacy, and effect on disease progression. *Arthritis Rheum.* 2004;50(7):2264-2272.
13. Mease PJ, Woolley JM, Singh A, Tsuji W, Dunn M, Chiou CF. Patient-reported outcomes in a randomized trial of etanercept in psoriatic arthritis. *J Rheumatol.* 2010;37(6):1221-1227.
14. Mease PJ, Goffe BS, Metz J, VanderStoep A, Finck B, Burge DJ. Etanercept in the treatment of psoriatic arthritis and psoriasis: a randomised trial. *Lancet.* 2000;356(9227):385-390.

**PICO 11. In adult patients with active PsA who are treatment-naïve, what are the benefits and harms of an OSM vs. IL12/23?**

Summary: The literature searches did not identify any studies that addressed this PICO question.

Quality of evidence across all critical outcomes: Very low

**PICO 12. In adult patients with active PsA who are treatment-naïve, what are the benefits and harms of an OSM vs. IL17i?**

Summary: The literature searches did not identify any studies that addressed this PICO question.

Quality of evidence across all critical outcomes: Very low

**PICO 13. In adult patients with active PsA who are treatment-naïve, what are the benefits and harms of a TNFi vs. IL12/23i?**

Summary: The literature searches did not identify any studies that addressed this PICO question.

Quality of evidence across all critical outcomes: Very low

**PICO 14. In adult patients with active PsA who are treatment-naïve, what are the benefits and harms of TNFi vs. IL17i?**

Summary: The literature searches did not identify any studies that addressed this PICO question.

Quality of evidence across all critical outcomes: Very low

**PICO 15. In adult patients with active PsA who are treatment-naïve, what are the benefits and harms of IL12/23i vs. IL17i?**

Summary: The literature searches did not identify any studies that addressed this PICO question.

Quality of evidence across all critical outcomes: Very low

**PICO 16. In adult patients with active PsA despite treatment with OSM, what are the benefits and harms of switching to TNFi compared to switching to IL12/23i?**

Summary: Thirteen placebo-controlled RCTs (16 publications) indirectly addressed this PICO question. Nine studies (12 publications) compared TNFi versus placebo in PsA patients.[1-12] Three studies compared IL 12/23 (ustekinumab) with placebo in PsA patients.[13-15] Lastly, one study compared etanercept with ustekinumab in psoriasis patients.[16] Statistically significant differences favoring TNFi over placebo and ustekinumab over placebo were reported for all efficacy outcomes (ACR20, HAQ-DI, PASI-75, data not shown). No statistically significant differences with placebo occurred for any adverse events (see Table 3 for serious infections). In addition, both TNFi-naïve and TNFi-exposed patients responded similarly to TNFi and ustekinumab compared to placebo (data not shown).

A network meta-analysis (method described in the Introduction under Evidence Summaries) was performed based on indirect comparisons of the placebo-controlled RCTs noted above (Table 1). Due to substantial heterogeneity in findings among different TNFis for ACR 20 and PASI75, the individual drugs were separated in the network meta-analysis. Of individual TNFis, golimumab (GOL) and infliximab were associated with significantly greater proportions of patients who achieved ACR20 compared to ustekinumab, while only infliximab was associated with significantly greater proportions of patients who achieved PASI75 compared to ustekinumab (see table below). The relative risk for golimumab was elevated in part due to a low placebo event rate (8.8%) in the GO-REVEAL trial compared to the ustekinumab trials (average 20.5%). Other individual TNFis did not show superiority over ustekinumab for these outcomes, but imprecision due to wide confidence intervals that overlapped the line of no difference means that the findings were inconclusive (data not shown). The findings for HAQ DI (proportion of patients who achieved a minimum important change) were also inconclusive between TNFis and ustekinumab due to a wide CI that overlapped the line of no difference. Infection rates (the only relevant adverse event that could be compared between drug classes) did not differ significantly between TNFis and ustekinumab (this outcome was compared using the Bucher adjusted indirect method, see description in the Introduction to this report). For illustrative purposes the network meta-analyses for ACR20 and HAQ-DI are diagrammed in Figures 1 and 2, respectively. An updated literature search in March 2018 identified one additional RCT showing superiority of golimumab over placebo[19]. This trial had not been previously reviewed by the panel, but it was moderate quality (due to indirectness) and the results did not change the overall findings or the overall quality of evidence.

One trial of psoriasis patients found statistically significant differences favoring ustekinumab over etanercept for one efficacy outcome (PASI75), but no significant differences were reported for serious infections (Table 2).[16] However, the event rate for serious infections was so low that the finding is inconclusive. The PASI75 finding was also supported by a published network meta-analysis of RCTs of patients with psoriasis.[17] In this analysis ustekinumab showed superiority over etanercept for PASI75 (OR 1.94, 95% CI 1.31 to 3.01) and did not differ significantly from adalimumab (OR 1.44, 95% CI 0.82 to 2.58), although the latter finding is inconclusive due to imprecision in the CI. However, Infliximab showed superiority over ustekinumab in this network meta-analysis (OR 3.92, 95% CI 1.83 to 9.06), which is consistent with the findings of our

independently performed network meta-analysis of PsA RCTs. A published meta-analysis of psoriasis RCTs found no significant difference between TNFi versus placebo and IL12/23i versus placebo in rates of major adverse cardiovascular events.[18]

Quality of evidence across all critical outcomes: Moderate

| <b>Table 1. TNFi compared to IL12/23i for patients with active PsA despite OSM</b>        |              |               |                      |             |                  |                             |                     |           |                                                           |                              |                                                                      |
|-------------------------------------------------------------------------------------------|--------------|---------------|----------------------|-------------|------------------|-----------------------------|---------------------|-----------|-----------------------------------------------------------|------------------------------|----------------------------------------------------------------------|
| Bibliography: PICO 16: TNFi compared to IL12/23i for patients with active PsA despite OSM |              |               |                      |             |                  |                             |                     |           |                                                           |                              |                                                                      |
| Quality assessment                                                                        |              |               |                      |             |                  |                             | Summary of findings |           |                                                           |                              |                                                                      |
| Nº of participants (studies)<br>Follow-up                                                 | Risk of bias | Inconsistency | Indirectness         | Imprecision | Publication bias | Overall quality of evidence |                     |           | Relative effect (95% CI)                                  | Anticipated absolute effects |                                                                      |
|                                                                                           |              |               |                      |             |                  |                             | With IL12/23i       | With TNFi |                                                           | Risk with IL12/23i           | Risk difference with TNFi                                            |
| <b>ACR20, 12-24 weeks, network meta-analysis</b>                                          |              |               |                      |             |                  |                             |                     |           |                                                           |                              |                                                                      |
| 1332 (4 RCTs)                                                                             | Not serious  | Not serious   | Serious <sup>a</sup> | Not serious | None             | ⊕⊕⊕○<br>MODERATE            | IL12/23i            | GOL       | <b>RR 2.44</b><br>(1.17 to 5.13)<br><br><b>Favors GOL</b> | 449 per 1,000<br>(0.449)     | <b>289 more per 1000 (0.289)</b> (44 more to 441 more) <sup>c</sup>  |
| 1431 (6 RCTs)                                                                             | Not serious  | Not serious   | Serious <sup>a</sup> | Not serious | None             | ⊕⊕⊕○<br>MODERATE            | IL12/23i            | IFX       | <b>RR 3.19</b><br>(1.87 to 5.46)<br><br><b>Favors IFX</b> | 449 per 1,000                | <b>417 more per 1000 (0.417)</b> (159 more to 515 more) <sup>c</sup> |
| <b>HAQ-DI<sup>d</sup>, 12-24 weeks, network meta-analysis</b>                             |              |               |                      |             |                  |                             |                     |           |                                                           |                              |                                                                      |

**Table 1. TNFi compared to IL12/23i for patients with active PsA despite OSM**

Bibliography: PICO 16: TNFi compared to IL12/23i for patients with active PsA despite OSM

| Quality assessment                                                 |             |             |                      |                      |      |                  | Summary of findings |      |                                                              |                       |                                                                     |
|--------------------------------------------------------------------|-------------|-------------|----------------------|----------------------|------|------------------|---------------------|------|--------------------------------------------------------------|-----------------------|---------------------------------------------------------------------|
| 2477 (10 RCTs)                                                     | Not serious | Not serious | Serious <sup>a</sup> | Not serious          | None | ⊕⊕⊕○<br>MODERATE | IL12/23i            | TNFi | <b>RR 0.99</b><br>(0.76 to 1.30)<br><br><b>No difference</b> | 441 per 1,000         | <b>4 fewer per 1000 (0.004)</b><br>(106 fewer to 132 more)          |
| <b>PASI 75, 12-24 weeks, network meta-analysis</b>                 |             |             |                      |                      |      |                  |                     |      |                                                              |                       |                                                                     |
| 1023 (5 RCTs)                                                      | Not serious | Not serious | Serious <sup>a</sup> | Not serious          | None | ⊕⊕⊕○<br>MODERATE | IL12/23i            | IFX  | <b>RR 3.34</b><br>(1.1 to 10.2)<br><br><b>Favors IFX</b>     | 569 per 1,000 (0.569) | <b>306 more per 1000 (0.306)</b> (66 more to 397 more) <sup>c</sup> |
| <b>Infection, 12-24 weeks, Bucher adjusted indirect comparison</b> |             |             |                      |                      |      |                  |                     |      |                                                              |                       |                                                                     |
| 1025 (3 RCTs)                                                      | Not serious | Not serious | Serious <sup>a</sup> | Serious <sup>b</sup> | None | ⊕⊕○○<br>LOW      | IL12/23i            | ADA  | <b>RR 0.56</b><br>(0.26 to 1.22)                             | 211 per 1,000         | <b>93 fewer per 1000 (0.093)</b><br>(156 fewer to 46 more)          |
| 1199 (3 RCTs)                                                      | Not serious | Not serious | Serious <sup>a</sup> | Serious <sup>b</sup> | None | ⊕⊕○○<br>LOW      | IL12/23i            | CZP  | <b>RR 1.19</b><br>(0.80 to 1.76)                             | 211 per 1,000         | <b>40 more per 1000 (0.040)</b> (42 fewer to 160 more)              |

CI: Confidence interval; RR: Risk ratio

- Indirect comparison, all studies compared drug to placebo, only 50-75% of patients had prior OSM exposure.
- Wide 95% CI
- Absolute risk differences calculated from odds ratios obtained using the Bucher method.
- HAQ-DI measured as proportion of patients who achieved minimum clinically important improvement (>0.3 or 0.35 in different studies).

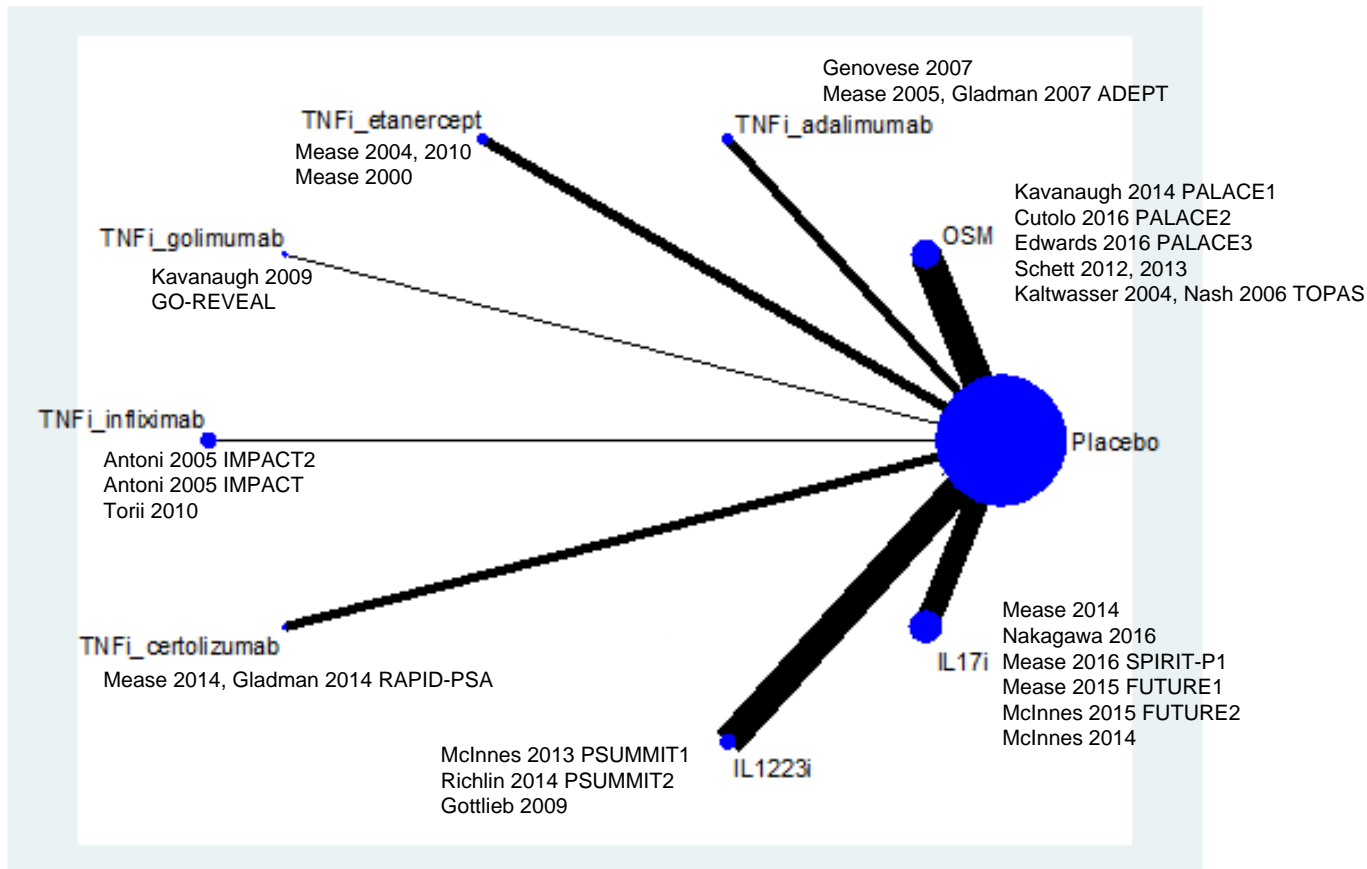

Figure 1. Network meta-analysis for ACR20. Node (blue circle) size and line thickness varies based on number of studies and patients in each comparison. The largest circle represents the placebo node (because all RCTs had a placebo control) and the branching lines connect to smaller nodes representing each of the treatments. Due to substantial heterogeneity within the TNFi class the individual TNFi drugs were analyzed separately and compared to the other drug classes (OSM, IL12/23i, and IL17i). The figure also identifies the specific trials that provided data for each treatment node.

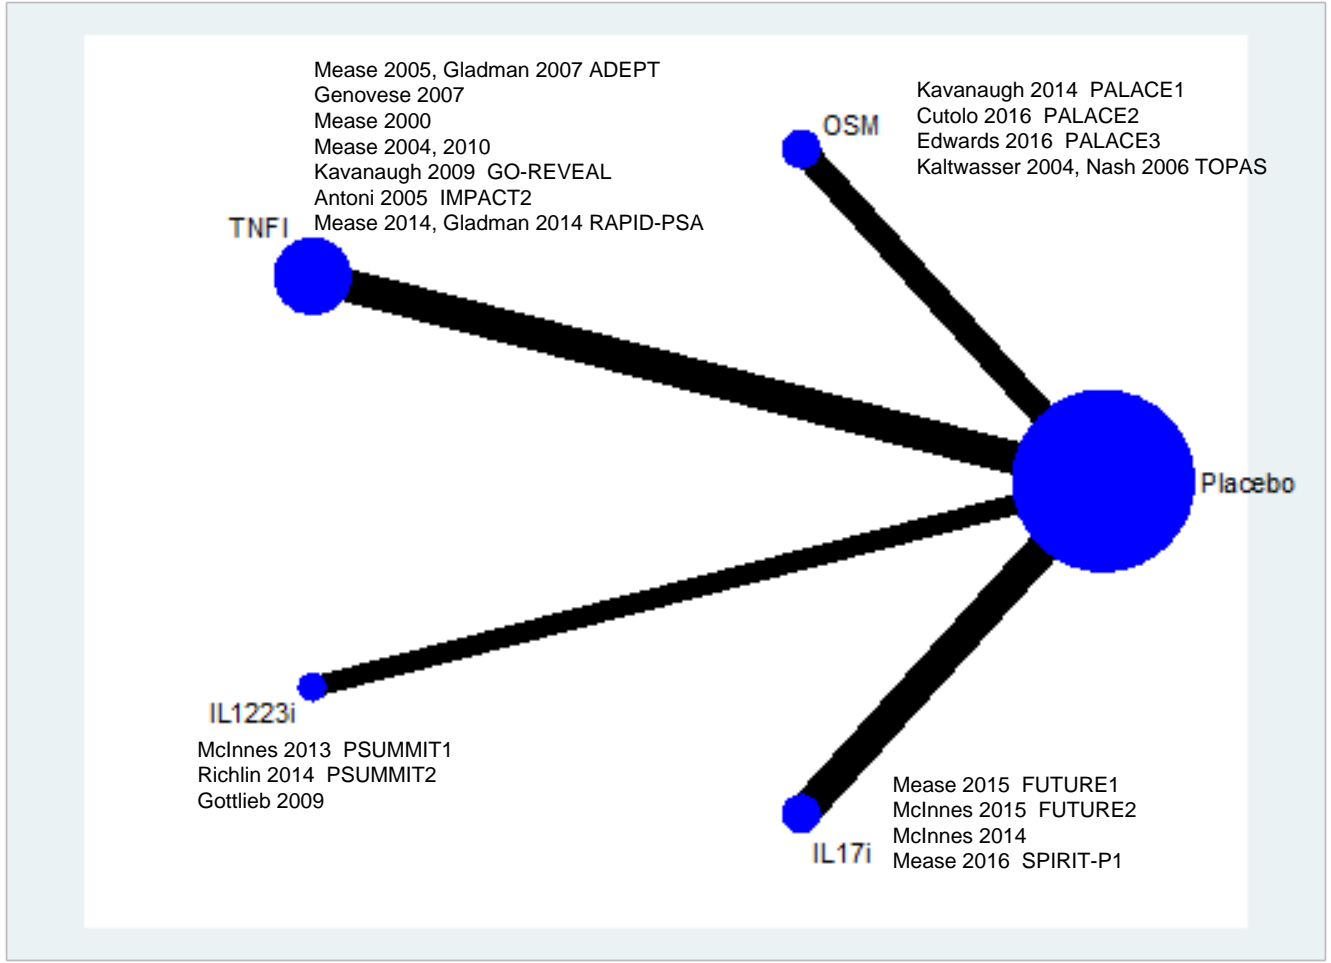

Figure 2. Network meta-analysis for HAQ-DI. Since there was no substantial heterogeneity within each drug class, a straight drug class comparison was performed for this outcome.



**Table 2. TNFi compared to IL12/23i for patients with Psoriasis despite OSM**

Bibliography: PICO 16: TNFi versus IL12/23i for PsA patients who failed OSM.

| Quality assessment                        |              |               |                      |             |                  |                             | Summary of findings   |                 |                                                                |                              |                                                            |
|-------------------------------------------|--------------|---------------|----------------------|-------------|------------------|-----------------------------|-----------------------|-----------------|----------------------------------------------------------------|------------------------------|------------------------------------------------------------|
| No of participants (studies)<br>Follow-up | Risk of bias | Inconsistency | Indirectness         | Imprecision | Publication bias | Overall quality of evidence | Study event rates (%) |                 | Relative effect (95% CI)                                       | Anticipated absolute effects |                                                            |
|                                           |              |               |                      |             |                  |                             | With TNFi (ETN)       | With IL12/23i   |                                                                | Risk with TNFi               | Risk difference with IL12/23i                              |
| <b>PASI-75 at 12 weeks</b>                |              |               |                      |             |                  |                             |                       |                 |                                                                |                              |                                                            |
| 903 (1 RCT)                               | not serious  | not serious   | serious <sup>a</sup> | not serious | none             | ⊕⊕⊕○<br>MODERATE            | 197/347 (56.8%)       | 397/556 (71.4%) | <b>RR 1.26</b><br>(1.13 to 1.40)<br><br><b>Favors IL12/23i</b> | 568 per 1,000 (0.568)        | <b>148 more per 1,000 (0.148)</b><br>(74 more to 227 more) |
| <b>Serious Infection</b>                  |              |               |                      |             |                  |                             |                       |                 |                                                                |                              |                                                            |
| 903 (1 RCT)                               | not serious  | not serious   | serious <sup>a</sup> | not serious | none             | ⊕⊕⊕○<br>MODERATE            | 1/347 (0.3%)          | 4/556 (0.7%)    | <b>RD 0.004</b><br>(-0.002 to 0.010)                           | 3 per 1,000                  | <b>4 more per 1,000 (0.004)</b><br>(2 fewer to 10 more)    |

CI: Confidence interval; RR: Risk ratio

a. Indirect population (psoriasis)

**Table 3. TNFi or IL12/23i compared to placebo for PICO 16: Adverse events**

Bibliography: PICO 16: TNFi versus IL 12/23i for PsA patients who failed OSM.

| Quality assessment | Summary of findings |
|--------------------|---------------------|
|--------------------|---------------------|

**Table 3. TNFi or IL12/23i compared to placebo for PICO 16: Adverse events**

Bibliography: PICO 16: TNFi versus IL 12/23i for PsA patients who failed OSM.

| Quality assessment                                 |              |               |                      |             |                  |                             | Summary of findings   |                 |                                                       |                              |                                                           |
|----------------------------------------------------|--------------|---------------|----------------------|-------------|------------------|-----------------------------|-----------------------|-----------------|-------------------------------------------------------|------------------------------|-----------------------------------------------------------|
| Nº of participants (studies)<br>Follow-up          | Risk of bias | Inconsistency | Indirectness         | Imprecision | Publication bias | Overall quality of evidence | Study event rates (%) |                 | Relative effect (95% CI)                              | Anticipated absolute effects |                                                           |
|                                                    |              |               |                      |             |                  |                             | With placebo          | With drug       |                                                       | Risk with placebo            | Risk difference with TNFi or IL12/23i                     |
| <b>Serious infection – TNFi vs. placebo</b>        |              |               |                      |             |                  |                             |                       |                 |                                                       |                              |                                                           |
| 1151<br>(5 RCTs)                                   | not serious  | not serious   | serious <sup>a</sup> | not serious | none             | ⊕⊕⊕○<br>MODERATE            | 8/564<br>(1.4%)       | 4/587<br>(0.7%) | <b>RR 0.54</b><br>(0.17 to 1.77)<br><br>No difference | 14 per 1,000<br>(0.014)      | <b>6 fewer per 1,000 (0.006)</b><br>(12 fewer to 11 more) |
| <b>Serious infection – Ustekinumab vs. placebo</b> |              |               |                      |             |                  |                             |                       |                 |                                                       |                              |                                                           |
| 925<br>(2 RCTs)                                    | not serious  | serious       | serious <sup>a</sup> | not serious | none             | ⊕⊕⊕○<br>MODERATE            | 2/309<br>(0.6%)       | 4/616<br>(0.6%) | <b>RR 0.84</b><br>(0.20 to 3.50)<br><br>No difference | 6 per 1,000<br>(0.006)       | <b>1 fewer per 1,000 (5 fewer to 15 more)</b>             |

CI: Confidence interval; RR: Risk ratio

a. Comparison to placebo

Working Group quality of evidence categories:

**High quality:** We are very confident that the true effect lies close to that of the estimate of the effect

**Moderate quality:** We are moderately confident in the effect estimate: The true effect is likely to be close to the estimate of the effect, but there is a possibility that it is substantially different

**Low quality:** Our confidence in the effect estimate is limited: The true effect may be substantially different from the estimate of the effect

**Very low quality:** We have very little confidence in the effect estimate: The true effect is likely to be substantially different from the estimate of effect

## References:

1. Mease PJ, Fleischmann R, Deodhar AA, Wollenhaupt J, Khraishi M, Kielar D, et al. Effect of certolizumab pegol on signs and symptoms in patients with psoriatic arthritis: 24-week results of a Phase 3 double-blind randomised placebo-controlled study (RAPID-PsA). *Ann Rheum Dis*. 2014;73(1):48-55.
2. Gladman D, Fleischmann R, Coteur G, Woltering F, Mease PJ. Effect of certolizumab pegol on multiple facets of psoriatic arthritis as reported by patients: 24-week patient-reported outcome results of a phase III, multicenter study. *Arthritis Care Res (Hoboken)*. 2014;66(7):1085-1092.
3. Genovese MC, Mease PJ, Thomson GT, Kivitz AJ, Perdok RJ, Weinberg MA, et al. Safety and efficacy of adalimumab in treatment of patients with psoriatic arthritis who had failed disease modifying antirheumatic drug therapy. *J Rheumatol*. 2007;34(5):1040-1050.
4. Mease PJ, Gladman DD, Ritchlin CT, Ruderman EM, Steinfeld SD, Choy EH, et al. Adalimumab for the treatment of patients with moderately to severely active psoriatic arthritis: results of a double-blind, randomized, placebo-controlled trial. *Arthritis Rheum*. 2005;52(10):3279-3289.
5. Gladman DD, Mease PJ, Cifaldi MA, Perdok RJ, Sasso E, Medich J. Adalimumab improves joint-related and skin-related functional impairment in patients with psoriatic arthritis: patient-reported outcomes of the Adalimumab Effectiveness in Psoriatic Arthritis Trial. *Ann Rheum Dis*. 2007;66(2):163-168.
6. Mease PJ, Kivitz AJ, Burch FX, Siegel EL, Cohen SB, Ory P, et al. Etanercept treatment of psoriatic arthritis: safety, efficacy, and effect on disease progression. *Arthritis Rheum*. 2004;50(7):2264-2272.
7. Mease PJ, Woolley JM, Singh A, Tsuji W, Dunn M, Chiou CF. Patient-reported outcomes in a randomized trial of etanercept in psoriatic arthritis. *J Rheumatol*. 2010;37(6):1221-1227.
8. Antoni C, Krueger GG, de Vlam K, Birbara C, Beutler A, Guzzo C, et al. Infliximab improves signs and symptoms of psoriatic arthritis: results of the IMPACT 2 trial. *Ann Rheum Dis*. 2005;64(8):1150-1157.
9. Mease PJ, Goffe BS, Metz J, VanderStoep A, Finck B, Burge DJ. Etanercept in the treatment of psoriatic arthritis and psoriasis: a randomised trial. *Lancet*. 2000;356(9227):385-390.
10. Kavanaugh A, McInnes I, Mease P, Krueger GG, Gladman D, Gomez-Reino J, et al. Golimumab, a new human tumor necrosis factor alpha antibody, administered every four weeks as a subcutaneous injection in psoriatic arthritis: Twenty-four-week efficacy and safety results of a randomized, placebo-controlled study. *Arthritis Rheum*. 2009;60(4):976-986.
11. Antoni CE, Kavanaugh A, Kirkham B, Tutuncu Z, Burmester GR, Schneider U, et al. Sustained benefits of infliximab therapy for dermatologic and articular manifestations of psoriatic arthritis: results from the infliximab multinational psoriatic arthritis controlled trial (IMPACT). *Arthritis Rheum*. 2005;52(4):1227-1236.
12. Torii H, Nakagawa H, Japanese Infliximab Study i. Infliximab monotherapy in Japanese patients with moderate-to-severe plaque psoriasis and psoriatic arthritis. A randomized, double-blind, placebo-controlled multicenter trial. *J Dermatol Sci*. 2010;59(1):40-49.

13. McInnes IB, Kavanaugh A, Gottlieb AB, Puig L, Rahman P, Ritchlin C, et al. Efficacy and safety of ustekinumab in patients with active psoriatic arthritis: 1 year results of the phase 3, multicentre, double-blind, placebo-controlled PSUMMIT 1 trial. *Lancet*. 2013;382(9894):780-789.
14. Gottlieb A, Menter A, Mendelsohn A, Shen YK, Li S, Guzzo C, et al. Ustekinumab, a human interleukin 12/23 monoclonal antibody, for psoriatic arthritis: randomised, double-blind, placebo-controlled, crossover trial. *Lancet*. 2009;373(9664):633-640.
15. Ritchlin C, Rahman P, Kavanaugh A, McInnes IB, Puig L, Li S, et al. Efficacy and safety of the anti-IL-12/23 p40 monoclonal antibody, ustekinumab, in patients with active psoriatic arthritis despite conventional non-biological and biological anti-tumour necrosis factor therapy: 6-month and 1-year results of the phase 3, multicentre, double-blind, placebo-controlled, randomised PSUMMIT 2 trial. *Ann Rheum Dis*. 2014;73(6):990-999.
16. Griffiths CE, Strober BE, van de Kerkhof P, Ho V, Fidelus-Gort R, Yeilding N, et al. Comparison of ustekinumab and etanercept for moderate-to-severe psoriasis. *N Engl J Med*. 2010;362(2):118-128.
17. Gupta AK, Daigle D, Lyons DC. Network Meta-analysis of Treatments for Chronic Plaque Psoriasis in Canada. *J Cutan Med Surg*. 2014;18(6):371-378.
18. Rungapiromnan W, Yiu ZZN, Warren RB, Griffiths CEM, Ashcroft DM. Impact of biologic therapies on risk of major adverse cardiovascular events in patients with psoriasis: systematic review and meta-analysis of randomized controlled trials. *Br J Dermatol*. 2017;176(4):890-901.
19. Kavanaugh A, Husni ME, Harrison DD, Kim L, Lo KH, Leu JH, Hsia EC. Safety and efficacy of intravenous golimumab in patients with active psoriatic arthritis. *Arth Rheum*. 2017;69(11):2151-2161.

**PICO 17. In adult patients with active PsA despite treatment with OSM, what are the benefits and harms of switching to TNFi compared to switching to IL17i?**

Summary. This question was addressed indirectly by 19 double-blind RCTs (22 publications). Two reports of the same study directly compared IL17i (secukinumab) to TNFi (etanercept) among patients with psoriasis; one study specifically reported data only for a subgroup of patients with PsA[1], and one report of outcomes for the whole population (patients with psoriasis)[2]. Nine studies (12 publications) involving PsA patients compared TNFis to placebo.[3-14] One study compared ixekizumab to placebo,[15] three studies compared secukinumab to placebo,[16-18] and three studies compared brodalumab to placebo[19-21] (note: brodalumab is currently FDA-approved for psoriasis but not PsA). Three studies (2 publications) compared secukinumab 300mg to secukinumab 150mg. All drugs showed statistically significant improvements in ACR20, PASI75, and HAQ-DI over placebo, while no significant difference was found for infections, but with high imprecision in the effect estimate. Subgroup analysis of previous TNFi exposure did not find differences between exposed and unexposed subgroups, but no studies specified whether TNFi experienced patients had TNFi treatment failure. In the study comparing secukinumab to etanercept, PASI75 was superior in the secukinumab group with statistically significant results (Table 1). A study of patients with psoriasis similarly found that ixekizumab was superior to etanercept for increasing PASI-75 (Table 2).[22] In studies comparing ACR20, PASI-75 and HAQ-DI for patients dosed with 300mg vs. 150mg of secukinumab, all outcomes showed no significant difference between the two doses of secukinumab, with direction of effect slightly favoring 300 mg (RR 1.06-1.15) but slight imprecision in the CIs (data not shown).

A network meta-analysis was performed to indirectly compare TNFis vs IL17is using the placebo-controlled RCTs noted above (see Table 1). Due to substantial heterogeneity in findings among different TNFis for ACR20, the individual TNFis were separated in the network meta-analysis. Of individual TNFis, only golimumab and infliximab were associated with a significantly higher proportion of patients who achieved ACR20 when compared to patients who received IL17is. The remaining TNFis did not show a significant difference compared to IL17is for ACR20, although all of these findings were inconclusive due to imprecise CIs that overlapped with the line of no difference (data not shown). For HAQ-DI minimum improvement, there was no substantial heterogeneity among different TNFis so a straight drug class comparison was performed. No significant difference between TNFis and IL17is was identified for this outcome, although the findings were inconclusive due to imprecision in the effect estimate. For PASI-75, although there was some heterogeneity among TNFis, none showed a significant difference with IL17is, so a straight drug class comparison was performed (there was also some heterogeneity among trials of secukinumab). The overall comparison found no significant between-class difference, but the findings were inconclusive due to imprecision in the effect estimate. Bucher adjusted indirect comparisons were performed for the outcome of infections (the only relevant adverse event reported by both sets of drug class trials). The two TNFi trials (one adalimumab, one certolizumab) showed heterogeneity and differences in effect direction, so they were separately compared to two trials of secukinumab that reported this outcome. Both comparisons found no significant difference but were inconclusive due to imprecision in the effect estimates. Six TNFi RCTs and 3 IL17i RCTs reported serious infections and found no significant difference between drug and placebo groups, although the finding was imprecise for IL17i due to a wide 95% CI (Table 3). A published meta-analysis of psoriasis RCTs found no significant difference between TNFi versus placebo and IL17i versus placebo in rates of major adverse cardiovascular events.[23] An updated

literature search in March 2018 identified one additional RCT showing superiority of golimumab over placebo[24]. This trial had not been previously reviewed by the panel, but it was moderate quality (due to indirectness) and the results did not change the overall findings or the overall quality of evidence.

Quality of evidence across all critical outcomes: Low

| <b>Table 1. TNFi compared to IL17i for patients with active PsA despite OSM</b>        |              |               |                      |             |                  |                             |                     |      |                                                       |                              |                                                                        |
|----------------------------------------------------------------------------------------|--------------|---------------|----------------------|-------------|------------------|-----------------------------|---------------------|------|-------------------------------------------------------|------------------------------|------------------------------------------------------------------------|
| Bibliography: PICO 17: TNFi compared to IL17i for patients with active PsA despite OSM |              |               |                      |             |                  |                             |                     |      |                                                       |                              |                                                                        |
| Quality assessment                                                                     |              |               |                      |             |                  |                             | Summary of findings |      |                                                       |                              |                                                                        |
| Nº of participants (studies) Follow-up                                                 | Risk of bias | Inconsistency | Indirectness         | Imprecision | Publication bias | Overall quality of evidence |                     |      | Relative effect (95% CI)                              | Anticipated absolute effects |                                                                        |
|                                                                                        |              |               |                      |             |                  |                             | IL17i               | TNFi |                                                       | Risk with IL17i              | Risk difference with TNFi                                              |
| <b>ACR20, 12-24 weeks, network meta-analysis</b>                                       |              |               |                      |             |                  |                             |                     |      |                                                       |                              |                                                                        |
| 1229 (7 RCTs)                                                                          | Not serious  | Not serious   | Serious <sup>a</sup> | Not serious | None             | ⊕⊕⊕○<br>MODERATE            | IL17i               | GOL  | <b>RR 2.21</b><br>(1.1 to 4.48)<br><b>Favors GOL</b>  | 503 per 1,000 (0.503)        | <b>213 more per 1000 (0.213)</b><br>(33 more to 344 more) <sup>e</sup> |
| 1328 (9 RCTs)                                                                          | Not serious  | Not serious   | Serious <sup>a</sup> | Not serious | None             | ⊕⊕⊕○<br>MODERATE            | IL17i               | IFX  | <b>RR 2.89</b><br>(1.79 to 4.67)<br><b>Favors IFX</b> | 503 per 1,000 (0.503)        | <b>351 more per 1000 (0.351)</b><br>(80 more to 458 more) <sup>e</sup> |
| <b>HAQ-DI<sup>f</sup>, 12-24 weeks, network meta-analysis</b>                          |              |               |                      |             |                  |                             |                     |      |                                                       |                              |                                                                        |

**Table 1. TNFi compared to IL17i for patients with active PsA despite OSM**

Bibliography: PICO 17: TNFi compared to IL17i for patients with active PsA despite OSM

| Quality assessment                                                             |                      |             |                      |                      |      |             | Summary of findings |      |                                                       |                          |                                                                          |
|--------------------------------------------------------------------------------|----------------------|-------------|----------------------|----------------------|------|-------------|---------------------|------|-------------------------------------------------------|--------------------------|--------------------------------------------------------------------------|
| 2258 (11 RCTs)                                                                 | Not serious          | Not serious | Serious <sup>a</sup> | Serious <sup>b</sup> | None | ⊕⊕○○<br>LOW | IL17i               | TNFi | <b>RR 1.28</b><br>(0.97 to 1.68)                      | 556 per 1,000<br>(0.556) | <b>156 more per 1000 (0.156)</b><br>(17 less to 378 more)                |
| <b>PASI 75, 12-24 weeks, network meta-analysis</b>                             |                      |             |                      |                      |      |             |                     |      |                                                       |                          |                                                                          |
| 1837 (14 RCTs)                                                                 | Not serious          | Not serious | Serious <sup>a</sup> | Serious <sup>b</sup> | None | ⊕⊕○○<br>LOW | IL17i               | TNFi | <b>OR 0.82</b><br>(0.29 to 2.34)                      | 643 per 1,000<br>(0.643) | <b>47 fewer per 1000 (0.047)</b><br>(300 fewer to 165 more) <sup>e</sup> |
| <b>PASI 75, 12-24 weeks, direct comparison (secukinumab versus etanercept)</b> |                      |             |                      |                      |      |             |                     |      |                                                       |                          |                                                                          |
| 1 RCT (143 patients)                                                           | Serious <sup>c</sup> | Not serious | Serious <sup>d</sup> | Not serious          | None | ⊕⊕○○<br>LOW | IL17i (SEC)         | ETN  | <b>RR 0.59</b><br>(0.40 to 0.88)<br><b>Favors SEC</b> | 657 per 1,000<br>(0.657) | <b>270 fewer per 1,000 (0.270)</b><br>(79 fewer to 394 fewer)            |
| <b>Infection, 12-24 weeks, Bucher adjusted indirect comparison</b>             |                      |             |                      |                      |      |             |                     |      |                                                       |                          |                                                                          |
| 702 (3 RCTs)                                                                   | Not serious          | Not serious | Serious <sup>a</sup> | Serious <sup>b</sup> | None | ⊕⊕○○<br>LOW | IL17i               | ADA  | <b>RR 0.45</b><br>(0.21 to 1.01)                      | 313 per 1,000<br>(0.313) | <b>172 fewer per 1000 (0.172)</b><br>(247 fewer to 0 more)               |

**Table 1. TNFi compared to IL17i for patients with active PsA despite OSM**

Bibliography: PICO 17: TNFi compared to IL17i for patients with active PsA despite OSM

| Quality assessment |             |             |                      |                      |      |             | Summary of findings |     |                                  |                          |                                                             |
|--------------------|-------------|-------------|----------------------|----------------------|------|-------------|---------------------|-----|----------------------------------|--------------------------|-------------------------------------------------------------|
| 876 (3 RCTs)       | Not serious | Not serious | Serious <sup>a</sup> | Serious <sup>b</sup> | None | ⊕⊕○○<br>LOW | IL17i               | CZP | <b>RR 0.94</b><br>(0.59 to 1.50) | 313 per 1,000<br>(0.313) | <b>19 fewer per 1000 (0.019)</b><br>(128 fewer to 157 more) |

CI: Confidence interval; RR: Risk ratio

- Indirect comparison, all studies compared drug to placebo, only 50-75% of patients had prior OSM exposure.
- Wide CI that is close to or crosses line of no difference
- PsA diagnosis based on patient records; PsA activity not measured within the study.
- Only 63% of patients had prior OSM exposure
- Absolute risk differences calculated from odds ratios obtained using the Bucher method.
- HAQ-DI measured as proportion of patients who achieved minimum clinically important improvement (>0.3 or 0.35 in different studies).

**Table 2. TNFi compared to IL17i for patients with psoriasis despite OSM**

Bibliography: PICO 17 - TNFi compared to IL17i for patients with active PsA despite OSM.

| Quality assessment                        |              |               |              |             |                  |                             | Summary of findings   |                 |                          |                              |                            |
|-------------------------------------------|--------------|---------------|--------------|-------------|------------------|-----------------------------|-----------------------|-----------------|--------------------------|------------------------------|----------------------------|
| Nº of participants (studies)<br>Follow-up | Risk of bias | Inconsistency | Indirectness | Imprecision | Publication bias | Overall quality of evidence | Study event rates (%) |                 | Relative effect (95% CI) | Anticipated absolute effects |                            |
|                                           |              |               |              |             |                  |                             | With TNFi (ETN)       | With IL17 (IXE) |                          | Risk with TNFi               | Risk difference with IL17i |
| <b>PASI-75 at week 12</b>                 |              |               |              |             |                  |                             |                       |                 |                          |                              |                            |



**Table 2. TNFi compared to IL17i for patients with psoriasis despite OSM**

Bibliography: PICO 17 - TNFi compared to IL17i for patients with active PsA despite OSM.

| Quality assessment |             |             |                      |             |      |                  | Summary of findings |                    |                                                                  |                          |                                                             |
|--------------------|-------------|-------------|----------------------|-------------|------|------------------|---------------------|--------------------|------------------------------------------------------------------|--------------------------|-------------------------------------------------------------|
| 1476<br>(1 RCT)    | not serious | not serious | serious <sup>a</sup> | not serious | none | ⊕⊕⊕○<br>MODERATE | 353/740<br>(47.7%)  | 651/736<br>(88.5%) | <b>RR 1.85</b><br>(1.71 to 2.01)<br><br><b>Favors IL17 (IXE)</b> | 477 per 1,000<br>(0.477) | <b>405 more per 1,000 (0.405)</b><br>(339 more to 482 more) |
| <b>Infection</b>   |             |             |                      |             |      |                  |                     |                    |                                                                  |                          |                                                             |
| 1473<br>(1 RCT)    | not serious | not serious | serious <sup>a</sup> | not serious | none | ⊕⊕⊕○<br>MODERATE | 159/739<br>(21.5%)  | 190/734<br>(25.9%) | <b>RR 1.20</b><br>(1.00 to 1.45)                                 | 215 per 1,000<br>(0.215) | <b>43 more per 1,000 (0.043)</b><br>(0 fewer to 97 more)    |

CI: Confidence interval; RR: Risk ratio

a. Indirect population (psoriasis)

**Table 3. TNFi or IL17i compared to placebo for PICO 17: Adverse events**

Bibliography: PICO 17: TNFi versus IL17i for PsA patients who failed OSM.

| Quality assessment                          |              |               |              |             |                  |                             | Summary of findings   |                    |                          |                              |                                    |
|---------------------------------------------|--------------|---------------|--------------|-------------|------------------|-----------------------------|-----------------------|--------------------|--------------------------|------------------------------|------------------------------------|
| N° of participants (studies)<br>Follow-up   | Risk of bias | Inconsistency | Indirectness | Imprecision | Publication bias | Overall quality of evidence | Study event rates (%) |                    | Relative effect (95% CI) | Anticipated absolute effects |                                    |
|                                             |              |               |              |             |                  |                             | With placebo          | With TNFi or IL17i |                          | Risk with placebo            | Risk difference with TNFi or IL17i |
| <b>Serious infection – TNFi vs. placebo</b> |              |               |              |             |                  |                             |                       |                    |                          |                              |                                    |

**Table 3. TNFi or IL17i compared to placebo for PICO 17: Adverse events**

Bibliography: PICO 17: TNFi versus IL17i for PsA patients who failed OSM.

| Quality assessment                           |             |             |                      |                      |      |                  | Summary of findings |                  |                                                              |                         |                                                           |
|----------------------------------------------|-------------|-------------|----------------------|----------------------|------|------------------|---------------------|------------------|--------------------------------------------------------------|-------------------------|-----------------------------------------------------------|
| 1151<br>(5 RCTs)                             | not serious | not serious | serious <sup>a</sup> | not serious          | none | ⊕⊕⊕○<br>MODERATE | 8/564<br>(1.4%)     | 4/587<br>(0.7%)  | <b>RR 0.54</b><br>(0.17 to 1.77)<br><br><b>No difference</b> | 14 per 1,000<br>(0.014) | <b>6 fewer per 1,000 (0.006)</b><br>(12 fewer to 11 more) |
| <b>Serious infection – IL17i vs. placebo</b> |             |             |                      |                      |      |                  |                     |                  |                                                              |                         |                                                           |
| 1189<br>(3 RCTs)                             | not serious | not serious | serious <sup>a</sup> | serious <sup>b</sup> | none | ⊕⊕○○<br>LOW      | 5/406<br>(1.2%)     | 18/685<br>(2.6%) | <b>RR 1.79</b><br>(0.75 to 4.30)                             | 12 per 1,000<br>(0.012) | <b>9 more per 1,000 (0.009)</b><br>(3 fewer to 52 more)   |

CI: Confidence interval; RR: Risk ratio

a. Comparison to placebo

b. Wide 95% CI that crosses line of no effect

Working Group quality of evidence categories:

**High quality:** We are very confident that the true effect lies close to that of the estimate of the effect

**Moderate quality:** We are moderately confident in the effect estimate: The true effect is likely to be close to the estimate of the effect, but there is a possibility that it is substantially different

**Low quality:** Our confidence in the effect estimate is limited: The true effect may be substantially different from the estimate of the effect

**Very low quality:** We have very little confidence in the effect estimate: The true effect is likely to be substantially different from the estimate of effect

#### References:

- Gottlieb AB, Langley RG, Philipp S, Sigurgeirsson B, Blauvelt A, Martin R, et al. Secukinumab Improves Physical Function in Subjects With Plaque Psoriasis and Psoriatic Arthritis: Results from Two Randomized, Phase 3 Trials. *J Drugs Dermatol.* 2015;14(8):821-833.
- Langley RG, Elewski BE, Lebwohl M, Reich K, Griffiths CE, Papp K, et al. Secukinumab in plaque psoriasis--results of two phase 3 trials. *N Engl J Med.* 2014;371(4):326-338.

3. Mease PJ, Fleischmann R, Deodhar AA, Wollenhaupt J, Khraishi M, Kielar D, et al. Effect of certolizumab pegol on signs and symptoms in patients with psoriatic arthritis: 24-week results of a Phase 3 double-blind randomised placebo-controlled study (RAPID-PsA). *Ann Rheum Dis*. 2014;73(1):48-55.
4. Gladman D, Fleischmann R, Coteur G, Woltering F, Mease PJ. Effect of certolizumab pegol on multiple facets of psoriatic arthritis as reported by patients: 24-week patient-reported outcome results of a phase III, multicenter study. *Arthritis Care Res (Hoboken)*. 2014;66(7):1085-1092.
5. Genovese MC, Mease PJ, Thomson GT, Kivitz AJ, Perdok RJ, Weinberg MA, et al. Safety and efficacy of adalimumab in treatment of patients with psoriatic arthritis who had failed disease modifying antirheumatic drug therapy. *J Rheumatol*. 2007;34(5):1040-1050.
6. Mease PJ, Gladman DD, Ritchlin CT, Ruderman EM, Steinfeld SD, Choy EH, et al. Adalimumab for the treatment of patients with moderately to severely active psoriatic arthritis: results of a double-blind, randomized, placebo-controlled trial. *Arthritis Rheum*. 2005;52(10):3279-3289.
7. Gladman DD, Mease PJ, Cifaldi MA, Perdok RJ, Sasso E, Medich J. Adalimumab improves joint-related and skin-related functional impairment in patients with psoriatic arthritis: patient-reported outcomes of the Adalimumab Effectiveness in Psoriatic Arthritis Trial. *Ann Rheum Dis*. 2007;66(2):163-168.
8. Mease PJ, Kivitz AJ, Burch FX, Siegel EL, Cohen SB, Ory P, et al. Etanercept treatment of psoriatic arthritis: safety, efficacy, and effect on disease progression. *Arthritis Rheum*. 2004;50(7):2264-2272.
9. Mease PJ, Woolley JM, Singh A, Tsuji W, Dunn M, Chiou CF. Patient-reported outcomes in a randomized trial of etanercept in psoriatic arthritis. *J Rheumatol*. 2010;37(6):1221-1227.
10. Antoni C, Krueger GG, de Vlam K, Birbara C, Beutler A, Guzzo C, et al. Infliximab improves signs and symptoms of psoriatic arthritis: results of the IMPACT 2 trial. *Ann Rheum Dis*. 2005;64(8):1150-1157.
11. Mease PJ, Goffe BS, Metz J, VanderStoep A, Finck B, Burge DJ. Etanercept in the treatment of psoriatic arthritis and psoriasis: a randomised trial. *Lancet*. 2000;356(9227):385-390.
12. Kavanaugh A, McInnes I, Mease P, Krueger GG, Gladman D, Gomez-Reino J, et al. Golimumab, a new human tumor necrosis factor alpha antibody, administered every four weeks as a subcutaneous injection in psoriatic arthritis: Twenty-four-week efficacy and safety results of a randomized, placebo-controlled study. *Arthritis Rheum*. 2009;60(4):976-986.
13. Antoni CE, Kavanaugh A, Kirkham B, Tutuncu Z, Burmester GR, Schneider U, et al. Sustained benefits of infliximab therapy for dermatologic and articular manifestations of psoriatic arthritis: results from the infliximab multinational psoriatic arthritis controlled trial (IMPACT). *Arthritis Rheum*. 2005;52(4):1227-1236.
14. Torii H, Nakagawa H, Japanese Infliximab Study i. Infliximab monotherapy in Japanese patients with moderate-to-severe plaque psoriasis and psoriatic arthritis. A randomized, double-blind, placebo-controlled multicenter trial. *J Dermatol Sci*. 2010;59(1):40-49.
15. Mease PJ, van der Heijde D, Ritchlin CT, Okada M, Cuchacovich RS, Shuler CL, et al. Ixekizumab, an interleukin-17A specific monoclonal antibody, for the treatment of biologic-naive patients with active psoriatic arthritis: results from the 24-week randomised, double-blind, placebo-controlled and active (adalimumab)-controlled period of the phase III trial SPIRIT-P1. *Ann Rheum Dis*. 2017;76(1):79-87.

16. McInnes IB, Mease PJ, Kirkham B, Kavanaugh A, Ritchlin CT, Rahman P, et al. Secukinumab, a human anti-interleukin-17A monoclonal antibody, in patients with psoriatic arthritis (FUTURE 2): a randomised, double-blind, placebo-controlled, phase 3 trial. *Lancet*. 2015;386(9999):1137-1146.
17. McInnes IB, Sieper J, Braun J, Emery P, van der Heijde D, Isaacs JD, et al. Efficacy and safety of secukinumab, a fully human anti-interleukin-17A monoclonal antibody, in patients with moderate-to-severe psoriatic arthritis: a 24-week, randomised, double-blind, placebo-controlled, phase II proof-of-concept trial. *Ann Rheum Dis*. 2014;73(2):349-356.
18. Mease PJ, McInnes IB, Kirkham B, Kavanaugh A, Rahman P, van der Heijde D, et al. Secukinumab Inhibition of Interleukin-17A in Patients with Psoriatic Arthritis. *N Engl J Med*. 2015;373(14):1329-1339.
19. Mease PJ, Genovese MC, Greenwald MW, Ritchlin CT, Beaulieu AD, Deodhar A, et al. Brodalumab, an anti-IL17RA monoclonal antibody, in psoriatic arthritis. *N Engl J Med*. 2014;370(24):2295-2306.
20. Nakagawa H, Niino H, Ootaki K, Japanese brodalumab study g. Brodalumab, a human anti-interleukin-17-receptor antibody in the treatment of Japanese patients with moderate-to-severe plaque psoriasis: Efficacy and safety results from a phase II randomized controlled study. *J Dermatol Sci*. 2016;81(1):44-52.
21. Papp K, Menter A, Strober B, Kricorian G, Thompson EH, Milmont CE, et al. Efficacy and safety of brodalumab in subpopulations of patients with difficult-to-treat moderate-to-severe plaque psoriasis. *J Am Acad Dermatol*. 2015;72(3):436-439 e431.
22. Griffiths CE, Reich K, Lebwohl M, van de Kerkhof P, Paul C, Menter A, et al. Comparison of ixekizumab with etanercept or placebo in moderate-to-severe psoriasis (UNCOVER-2 and UNCOVER-3): results from two phase 3 randomised trials. *Lancet*. 2015;386(9993):541-551.
23. Rungapiromnan W, Yiu ZZN, Warren RB, Griffiths CEM, Ashcroft DM. Impact of biologic therapies on risk of major adverse cardiovascular events in patients with psoriasis: systematic review and meta-analysis of randomized controlled trials. *Br J Dermatol*. 2017;176(4):890-901.
24. Kavanaugh A, Husni ME, Harrison DD, Kim L, Lo KH, Leu JH, Hsia EC. Safety and efficacy of intravenous golimumab in patients with active psoriatic arthritis. *Arth Rheum*. 2017;69(11):2151-2161.

**PICO 18. In adult patients with active PsA despite treatment with OSM, what are the benefits and harms of switching to IL12/23i compared to switching to IL17i?**

**Summary:** This PICO question was addressed indirectly by 16 double-blind RCTs (13 publications). Three studies (2 publications) involving psoriasis patients compared IL12/23i (ustekinumab) to IL17i.[1,2] Thirteen studies (11 publications) involving PsA patients or psoriasis patients compared either IL12/23i or IL17i to placebo.[3-13] All drugs showed statistically significant improvements in ACR20, PASI-75, and HAQ-DI over placebo (data not shown).

A network meta-analysis was performed to indirectly compare IL12/23i vs IL17is using the placebo-controlled RCTs noted above. The meta-analysis showed no significant between-class differences for the outcomes ACR20, HAQ-DI and PASI-75, but there was imprecision in all effect sizes due to wide CIs (see Table 1). A Bucher adjusted indirect comparison similarly found no significant between-class difference in infection rates, again with imprecision due to a wide CI.

Studies of patients with psoriasis found no significant difference in PASI-75 when comparing ustekinumab to brodalumab. The psoriasis study comparing ustekinumab to secukinumab reported that PASI-75 was superior in the secukinumab group and there was no significant difference in infection rates between the two groups (Table 2).

Serious infections for drug vs. placebo groups appear in Table 3. Neither IL12/23i nor IL17i showed significantly different serious infection rates compared to placebo groups, but the findings were imprecise for IL17i due to a wide 95% confidence interval.

Quality of evidence across all critical outcomes: Moderate

| <b>Table 1. IL12/23i compared to IL17i for patients with active PsA despite OSM</b>        |              |               |              |             |                  |                             |                     |       |                          |                              |                            |
|--------------------------------------------------------------------------------------------|--------------|---------------|--------------|-------------|------------------|-----------------------------|---------------------|-------|--------------------------|------------------------------|----------------------------|
| Bibliography: PICO 18: IL12/23i compared to IL17i for patients with active PsA despite OSM |              |               |              |             |                  |                             |                     |       |                          |                              |                            |
| Quality assessment                                                                         |              |               |              |             |                  |                             | Summary of findings |       |                          |                              |                            |
| Nº of participants (studies)<br>Follow-up                                                  | Risk of bias | Inconsistency | Indirectness | Imprecision | Publication bias | Overall quality of evidence |                     |       | Relative effect (95% CI) | Anticipated absolute effects |                            |
|                                                                                            |              |               |              |             |                  |                             | IL12/23i            | IL17i |                          | Risk with IL12/23i           | Risk difference with IL17i |
| <b>ACR20, 12-24 weeks, network meta-analysis</b>                                           |              |               |              |             |                  |                             |                     |       |                          |                              |                            |

**Table 1. IL12/23i compared to IL17i for patients with active PsA despite OSM**

Bibliography: PICO 18: IL12/23i compared to IL17i for patients with active PsA despite OSM

| Quality assessment                                                 |             |             |                          |                      |      |                  | Summary of findings |              |                                  |                          |                                                                        |
|--------------------------------------------------------------------|-------------|-------------|--------------------------|----------------------|------|------------------|---------------------|--------------|----------------------------------|--------------------------|------------------------------------------------------------------------|
| 2043 (9 RCTs)                                                      | Not serious | Not serious | Not serious <sup>a</sup> | Serious <sup>b</sup> | None | ⊕⊕⊕○<br>MODERATE | <b>IL12/23i</b>     | <b>IL17i</b> | <b>RR 1.1</b><br>(0.69 to 1.77)  | 449 per 1,000<br>(0.449) | <b>45 more per 1000 (0.045)</b><br>(139 fewer to 346 more)             |
| <b>HAQ-DI<sup>c</sup>, 12-24 weeks, network meta-analysis</b>      |             |             |                          |                      |      |                  |                     |              |                                  |                          |                                                                        |
| 1913 (7 RCTs)                                                      | Not serious | Not serious | Not serious <sup>a</sup> | Serious <sup>b</sup> | None | ⊕⊕⊕○<br>MODERATE | <b>IL12/23i</b>     | <b>IL17i</b> | <b>RR 0.81</b><br>(0.58 to 1.13) | 441 per 1,000<br>(0.441) | <b>84 fewer per 1000 (0.084)</b><br>(185 fewer to 57 more)             |
| <b>PASI 75, 12-24 weeks, network meta-analysis</b>                 |             |             |                          |                      |      |                  |                     |              |                                  |                          |                                                                        |
| 1630 (9 RCTs)                                                      | Not serious | Not serious | Not serious <sup>a</sup> | Serious <sup>b</sup> | None | ⊕⊕⊕○<br>MODERATE | <b>IL12/23i</b>     | <b>IL17i</b> | <b>RR 1.20</b><br>(0.46 to 3.12) | 569 per 1,000<br>(0.569) | <b>112 more per 1000 (0.112)</b><br>(92 less to 265 more) <sup>d</sup> |
| <b>Infection, 12-24 weeks, Bucher adjusted indirect comparison</b> |             |             |                          |                      |      |                  |                     |              |                                  |                          |                                                                        |
| 1527 (4 RCTs)                                                      | Not serious | Not serious | Not serious <sup>a</sup> | Serious <sup>b</sup> | None | ⊕⊕⊕○<br>MODERATE | <b>IL12/23i</b>     | <b>IL17i</b> | <b>RR 1.26</b><br>(0.81 to 1.97) | 211 per 1,000<br>(0.211) | <b>55 more per 1000 (0.112)</b><br>(40 less to 205 more)               |

CI: Confidence interval; RR: Risk ratio

- a. Indirect comparison, all studies compared drug to placebo, only 50-75% of patients had prior OSM exposure, but patient characteristics and prior drug exposure are similar between drug classes.
- b. Wide 95% CI that includes possibility of no between-group difference or a substantial between-group difference
- c. HAQ-DI measured as proportion of patients who achieved minimum clinically important improvement (>0.3 or 0.35 in different studies).
- d. Absolute risk differences calculated from odds ratios obtained using the Bucher method.

**Table 2. IL12/23 (Ustekinumab) compared to IL17 (Brodalumab or Secukinumab) in patients with psoriasis**

**Bibliography: PICO 18: IL12/23i versus IL17i for PsA patients who failed OSM.**

| Quality assessment                        |              |               |                      |             |                  |                             | Summary of findings   |                                 |                                                       |                              |                                                            |
|-------------------------------------------|--------------|---------------|----------------------|-------------|------------------|-----------------------------|-----------------------|---------------------------------|-------------------------------------------------------|------------------------------|------------------------------------------------------------|
| Nº of participants (studies)<br>Follow-up | Risk of bias | Inconsistency | Indirectness         | Imprecision | Publication bias | Overall quality of evidence | Study event rates (%) |                                 | Relative effect (95% CI)                              | Anticipated absolute effects |                                                            |
|                                           |              |               |                      |             |                  |                             | With IL12/23i         | With IL17i                      |                                                       | Risk with IL12/23i           | Risk difference with IL17i                                 |
| <b>PASI-75</b>                            |              |               |                      |             |                  |                             |                       |                                 |                                                       |                              |                                                            |
| 1852 (2 RCTs)                             | not serious  | not serious   | serious <sup>a</sup> | not serious | none             | ⊕⊕⊕○<br>MODERATE            | 427/613 (69.7%)       | 841/1239 (67.9%)<br><b>BROD</b> | <b>RR 0.98</b><br>(0.91 to 1.04)                      | 697 per 1,000 (0.697)        | <b>14 fewer per 1,000 (0.014)</b><br>(63 fewer to 28 more) |
| 671 (1 RCT)                               | not serious  | not serious   | serious <sup>a</sup> | not serious | none             | ⊕⊕⊕○<br>MODERATE            | 277/336 (82.4%)       | 311/335 (92.8%)<br><b>SEC</b>   | <b>RR 1.12</b><br>(1.06 to 1.19)<br><b>Favors SEC</b> | 824 per 1,000 (0.824)        | <b>99 more per 1,000 (0.099)</b><br>(49 more to 157 more)  |
| <b>Infection</b>                          |              |               |                      |             |                  |                             |                       |                                 |                                                       |                              |                                                            |
| 671 (1 RCT)                               | not serious  | not serious   | serious <sup>a</sup> | not serious | none             | ⊕⊕⊕○<br>MODERATE            | 85/336 (25.3%)        | 98/335 (29.3%)<br><b>SEC</b>    | <b>RR 1.16</b><br>(0.90 to 1.49)                      | 253 per 1,000 (0.253)        | <b>40 more per 1,000 (0.040)</b><br>(25 fewer to 124 more) |

**CI:** Confidence interval; **RR:** Risk ratio  
a. Entire patient population was Psoriasis

**Table 3. IL12/23i or IL17i compared to placebo for PICO 18: Adverse events**

Bibliography: PICO 18: IL12/23i versus IL17i for PsA patients who failed OSM.

| Quality assessment                                 |              |               |                      |                      |                  |                             | Summary of findings   |                        |                                                              |                              |                                                         |
|----------------------------------------------------|--------------|---------------|----------------------|----------------------|------------------|-----------------------------|-----------------------|------------------------|--------------------------------------------------------------|------------------------------|---------------------------------------------------------|
| No of participants (studies)<br>Follow-up          | Risk of bias | Inconsistency | Indirectness         | Imprecision          | Publication bias | Overall quality of evidence | Study event rates (%) |                        | Relative effect (95% CI)                                     | Anticipated absolute effects |                                                         |
|                                                    |              |               |                      |                      |                  |                             | With placebo          | With IL12/23i or IL17i |                                                              | Risk with placebo            | Risk difference with IL12/23i or IL17i                  |
| <b>Serious infection – Ustekinumab vs. placebo</b> |              |               |                      |                      |                  |                             |                       |                        |                                                              |                              |                                                         |
| 925 (2 RCTs)                                       | not serious  | serious       | serious <sup>a</sup> | not serious          | none             | ⊕⊕⊕○<br>MODERATE            | 2/309 (0.6%)          | 4/616 (0.6%)           | <b>RR 0.84</b><br>(0.20 to 3.50)<br><br><b>No difference</b> | 6 per 1,000 (0.006)          | <b>1 fewer per 1,000</b><br>(5 fewer to 15 more)        |
| <b>Serious infection – IL17i vs. placebo</b>       |              |               |                      |                      |                  |                             |                       |                        |                                                              |                              |                                                         |
| 1189 (3 RCTs)                                      | not serious  | not serious   | serious <sup>a</sup> | serious <sup>b</sup> | none             | ⊕⊕○○<br>LOW                 | 5/406 (1.2%)          | 18/685 (2.6%)          | <b>RR 1.79</b><br>(0.75 to 4.30)                             | 12 per 1,000 (0.012)         | <b>9 more per 1,000 (0.009)</b><br>(3 fewer to 52 more) |

**CI:** Confidence interval; **RR:** Risk ratio  
a. Comparison to placebo  
b. Wide 95% CI that crosses line of no effect

Working Group quality of evidence categories:



**High quality:** We are very confident that the true effect lies close to that of the estimate of the effect

**Moderate quality:** We are moderately confident in the effect estimate: The true effect is likely to be close to the estimate of the effect, but there is a possibility that it is substantially different

**Low quality:** Our confidence in the effect estimate is limited: The true effect may be substantially different from the estimate of the effect

**Very low quality:** We have very little confidence in the effect estimate: The true effect is likely to be substantially different from the estimate of effect

## References:

1. Lebwohl M, Strober B, Menter A, Gordon K, Weglowska J, Puig L, et al. Phase 3 Studies Comparing Brodalumab with Ustekinumab in Psoriasis. *N Engl J Med*. 2015;373(14):1318-1328.
2. Thaci D, Blauvelt A, Reich K, Tsai TF, Vanaclocha F, Kingo K, et al. Secukinumab is superior to ustekinumab in clearing skin of subjects with moderate to severe plaque psoriasis: CLEAR, a randomized controlled trial. *J Am Acad Dermatol*. 2015;73(3):400-409.
3. McInnes IB, Kavanaugh A, Gottlieb AB, Puig L, Rahman P, Ritchlin C, et al. Efficacy and safety of ustekinumab in patients with active psoriatic arthritis: 1 year results of the phase 3, multicentre, double-blind, placebo-controlled PSUMMIT 1 trial. *Lancet*. 2013;382(9894):780-789.
4. McInnes IB, Mease PJ, Kirkham B, Kavanaugh A, Ritchlin CT, Rahman P, et al. Secukinumab, a human anti-interleukin-17A monoclonal antibody, in patients with psoriatic arthritis (FUTURE 2): a randomised, double-blind, placebo-controlled, phase 3 trial. *Lancet*. 2015;386(9999):1137-1146.
5. McInnes IB, Sieper J, Braun J, Emery P, van der Heijde D, Isaacs JD, et al. Efficacy and safety of secukinumab, a fully human anti-interleukin-17A monoclonal antibody, in patients with moderate-to-severe psoriatic arthritis: a 24-week, randomised, double-blind, placebo-controlled, phase II proof-of-concept trial. *Ann Rheum Dis*. 2014;73(2):349-356.
6. Mease PJ, McInnes IB, Kirkham B, Kavanaugh A, Rahman P, van der Heijde D, et al. Secukinumab Inhibition of Interleukin-17A in Patients with Psoriatic Arthritis. *N Engl J Med*. 2015;373(14):1329-1339.
7. Gottlieb A, Menter A, Mendelsohn A, Shen YK, Li S, Guzzo C, et al. Ustekinumab, a human interleukin 12/23 monoclonal antibody, for psoriatic arthritis: randomised, double-blind, placebo-controlled, crossover trial. *Lancet*. 2009;373(9664):633-640.
8. Papp K, Menter A, Strober B, Kricorian G, Thompson EH, Milmont CE, et al. Efficacy and safety of brodalumab in subpopulations of patients with difficult-to-treat moderate-to-severe plaque psoriasis. *J Am Acad Dermatol*. 2015;72(3):436-439 e431.
9. Mease PJ, van der Heijde D, Ritchlin CT, Okada M, Cuchacovich RS, Shuler CL, et al. Ixekizumab, an interleukin-17A specific monoclonal antibody, for the treatment of biologic-naïve patients with active psoriatic arthritis: results from the 24-week randomised, double-blind, placebo-controlled and active (adalimumab)-controlled period of the phase III trial SPIRIT-P1. *Ann Rheum Dis*. 2017;76(1):79-87.
10. Mease PJ, Genovese MC, Greenwald MW, Ritchlin CT, Beaulieu AD, Deodhar A, et al. Brodalumab, an anti-IL17RA monoclonal antibody, in psoriatic arthritis. *N Engl J Med*. 2014;370(24):2295-2306.
11. Ritchlin C, Rahman P, Kavanaugh A, McInnes IB, Puig L, Li S, et al. Efficacy and safety of the anti-IL-12/23 p40 monoclonal antibody, ustekinumab, in patients with active psoriatic arthritis despite conventional non-biological and biological anti-tumour necrosis factor

therapy: 6-month and 1-year results of the phase 3, multicentre, double-blind, placebo-controlled, randomised PSUMMIT 2 trial. *Ann Rheum Dis.* 2014;73(6):990-999.

12. Nakagawa H, Niino H, Ootaki K, Japanese brodalumab study g. Brodalumab, a human anti-interleukin-17-receptor antibody in the treatment of Japanese patients with moderate-to-severe plaque psoriasis: Efficacy and safety results from a phase II randomized controlled study. *J Dermatol Sci.* 2016;81(1):44-52.
13. Gottlieb AB, Langley RG, Philipp S, Sigurgeirsson B, Blauvelt A, Martin R, et al. Secukinumab Improves Physical Function in Subjects With Plaque Psoriasis and Psoriatic Arthritis: Results from Two Randomized, Phase 3 Trials. *J Drugs Dermatol.* 2015;14(8):821-833.

**PICO 19. In adult patients with active PsA despite treatment with an OSM, what are the benefits and harms of switching to MTX and TNFi combination therapy compared to switching to TNFi monotherapy?**

Summary: This PICO was addressed by direct drug comparisons in 4 studies (2 RCTs, 1 post hoc analysis of 2 RCTs,[1,2,3] 1 observational[4]), but two of these studies had an indirect population (patients with psoriasis).[2,3] Three studies comparing MTX and TNFi (etanercept) combination therapy with TNFi (etanercept) monotherapy reported no statistically significant differences for three efficacy outcomes (ACR20, HAQ-DI, Physician Global). However, results for one efficacy outcome (PASI75) indicated a statistically significant difference in psoriasis patients at 24 weeks in one RCT,[2] but no statistically significant difference in PsA patients at 24 weeks in the post hoc analysis of two RCTs.[1] The psoriasis RCTs reported no statistically significant between-group difference for adverse events (serious infection, infection, hepatic events), but except for total infections the findings were imprecise.

Quality of evidence across all critical outcomes: Low

| <b>MTX + TNFi compared to TNFi monotherapy for PsA patients failed OSM (randomized)</b><br>Bibliography: PICO 19: MTX + TNFi combination vs. TNFi monotherapy for PsA patients failed OSM. |                      |               |                      |             |                  |                             |                       |                 |                                                              |                              |                                                           |
|--------------------------------------------------------------------------------------------------------------------------------------------------------------------------------------------|----------------------|---------------|----------------------|-------------|------------------|-----------------------------|-----------------------|-----------------|--------------------------------------------------------------|------------------------------|-----------------------------------------------------------|
| Quality assessment                                                                                                                                                                         |                      |               |                      |             |                  |                             | Summary of findings   |                 |                                                              |                              |                                                           |
| No of participants (studies) Follow-up                                                                                                                                                     | Risk of bias         | Inconsistency | Indirectness         | Imprecision | Publication bias | Overall quality of evidence | Study event rates (%) |                 | Relative effect (95% CI)                                     | Anticipated absolute effects |                                                           |
|                                                                                                                                                                                            |                      |               |                      |             |                  |                             | With TNFi monotherapy | With MTX + TNFi |                                                              | Risk with TNFi monotherapy   | Risk difference with MTX + TNFi                           |
| <b>ACR20, 24 weeks</b>                                                                                                                                                                     |                      |               |                      |             |                  |                             |                       |                 |                                                              |                              |                                                           |
| 431 (post hoc analysis of 2 RCTs)                                                                                                                                                          | serious <sup>a</sup> | not serious   | serious <sup>b</sup> | not serious | none             | ⊕⊕○○<br>LOW                 | 203/288 (70.5%)       | 100/143 (69.9%) | <b>RR 0.99</b><br>(0.87 to 1.13)<br><br><b>No difference</b> | 705 per 1,000 (0.705)        | <b>7 fewer per 1,000 (0.007)</b><br>(92 fewer to 92 more) |
| <b>HAQ-DI<sup>c</sup>, 24 weeks</b>                                                                                                                                                        |                      |               |                      |             |                  |                             |                       |                 |                                                              |                              |                                                           |

## MTX + TNFi compared to TNFi monotherapy for PsA patients failed OSM (randomized)

Bibliography: PICO 19: MTX + TNFi combination vs. TNFi monotherapy for PsA patients failed OSM.

| Quality assessment                            |                      |             |                      |                      |      | Summary of findings |                    |                    |                                                                  |                          |                                                             |
|-----------------------------------------------|----------------------|-------------|----------------------|----------------------|------|---------------------|--------------------|--------------------|------------------------------------------------------------------|--------------------------|-------------------------------------------------------------|
| 436<br>(post hoc analysis of 2 RCTs)          | serious <sup>a</sup> | not serious | serious <sup>b</sup> | not serious          | none | ⊕⊕○○<br>LOW         | 178/295<br>(60.3%) | 92/141<br>(65.2%)  | <b>RR 1.08</b><br>(0.93 to 1.26)<br><br><b>No difference</b>     | 603 per 1,000<br>(0.603) | <b>48 more per 1,000 (0.048)</b><br>(42 fewer to 157 more)  |
| <b>PASI 75, Psoriatic arthritis, 24 weeks</b> |                      |             |                      |                      |      |                     |                    |                    |                                                                  |                          |                                                             |
| 406<br>(post hoc analysis of 2 RCTs)          | serious <sup>a</sup> | not serious | serious <sup>b</sup> | not serious          | none | ⊕⊕○○<br>LOW         | 166/278<br>(59.7%) | 75/128<br>(58.6%)  | <b>RR 0.98</b><br>(0.80 to 1.15)<br><br><b>No difference</b>     | 597 per 1,000<br>(0.597) | <b>12 fewer per 1,000 (0.012)</b><br>(119 fewer to 90 more) |
| <b>PASI 75, Psoriasis, 24 weeks</b>           |                      |             |                      |                      |      |                     |                    |                    |                                                                  |                          |                                                             |
| 537<br>(2 RCTs)                               | serious <sup>d</sup> | not serious | serious <sup>e</sup> | not serious          | none | ⊕⊕○○<br>LOW         | 167/267<br>(62.5%) | 213/270<br>(78.9%) | <b>RR 1.26</b><br>(1.11 to 1.44)<br><br><b>Favors MTX + TNFi</b> | 625 per 1,000<br>(0.625) | <b>163 more per 1,000 (0.163)</b><br>(69 more to 275 more)  |
| <b>Serious Infection, Psoriasis</b>           |                      |             |                      |                      |      |                     |                    |                    |                                                                  |                          |                                                             |
| 59<br>(1 RCT)                                 | not serious          | not serious | serious <sup>e</sup> | serious <sup>f</sup> | none | ⊕⊕○○<br>LOW         | 1/28<br>(3.6%)     | 0/31<br>(0.0%)     | <b>RR 0.30</b><br>(0.01 to 7.13)                                 | 36 per 1,000<br>(0.036)  | <b>25 fewer per 1,000 (0.025)</b><br>(35 fewer to 219 more) |

## MTX + TNFi compared to TNFi monotherapy for PsA patients failed OSM (randomized)

Bibliography: PICO 19: MTX + TNFi combination vs. TNFi monotherapy for PsA patients failed OSM.

| Quality assessment                                                         |             |             |                      |                      |      | Summary of findings |                   |                   |                                                                        |                         |                                                           |
|----------------------------------------------------------------------------|-------------|-------------|----------------------|----------------------|------|---------------------|-------------------|-------------------|------------------------------------------------------------------------|-------------------------|-----------------------------------------------------------|
| <b>Infections, 24 weeks, Psoriasis</b>                                     |             |             |                      |                      |      |                     |                   |                   |                                                                        |                         |                                                           |
| 478<br>(1 RCT)                                                             | not serious | not serious | serious <sup>e</sup> | not serious          | none | ⊕⊕⊕○<br>MODERATE    | 62/239<br>(25.9%) | 83/239<br>(34.7%) | <b>RR 1.34</b><br>(1.02 to 1.76)<br><br><b>Favors TNFi mono</b>        | 259 per 1,000           | <b>88 more per 1,000 (0.088)</b><br>(5 more to 197 more)  |
| <b>Hepatic adverse event (increased transminases), 24 weeks, Psoriasis</b> |             |             |                      |                      |      |                     |                   |                   |                                                                        |                         |                                                           |
| 478<br>(1 RCT)                                                             | not serious | not serious | serious <sup>e</sup> | serious <sup>f</sup> | none | ⊕⊕○○<br>LOW         | 4/239<br>(1.7%)   | 7/239<br>(2.9%)   | <b>RD 0.01 (-0.01 to 0.04)</b><br><br><b>RR 1.75</b><br>(0.52 to 5.90) | 17 per 1,000<br>(0.017) | <b>10 more per 1,000 (0.010)</b><br>(10 fewer to 40 more) |

**CI:** Confidence interval; **RR:** Risk ratio

- a. Both RCTs contributing data to this post hoc analysis did not describe randomization methods or allocation concealment methods, and 1 trial did not report blinding of outcome assessors.
- b. Indirect comparison of treatment arms from 2 placebo-controlled RCTs.
- c. HAQ-DI measured as proportion of patients who achieved minimum clinically important improvement (>0.3 or 0.35 in different studies).
- d. Open label study
- e. Indirect population (Psoriasis patients)
- f. Low number of events

## MTX + TNFi compared to TNFi monotherapy for PsA patients failed OSM (observational)

Bibliography: PICO 19: MTX + TNFi combination vs. TNFi monotherapy for PsA patients failed OSM.

| Quality assessment                        |                      |               |              |             |                  |                             | Summary of findings            |                                 |                                                              |                              |                                                             |
|-------------------------------------------|----------------------|---------------|--------------|-------------|------------------|-----------------------------|--------------------------------|---------------------------------|--------------------------------------------------------------|------------------------------|-------------------------------------------------------------|
| No of participants (studies)<br>Follow-up | Risk of bias         | Inconsistency | Indirectness | Imprecision | Publication bias | Overall quality of evidence | Study event rates (%)          |                                 | Relative effect (95% CI)                                     | Anticipated absolute effects |                                                             |
|                                           |                      |               |              |             |                  |                             | With TNFi monotherapy          | With MTX + TNFi                 |                                                              | Risk with TNFi monotherapy   | Risk difference with MTX + TNFi                             |
| <b>HAQ-DI , 24 weeks</b>                  |                      |               |              |             |                  |                             |                                |                                 |                                                              |                              |                                                             |
| 284 (1 observational study)               | serious <sup>a</sup> | not serious   | not serious  | not serious | none             | ⊕⊕○○<br>LOW                 | 52/98 (53.1%)                  | 98/186 (52.7%)                  | <b>RR 0.99</b><br>(0.79 to 1.25)<br><br><b>No difference</b> | 531 per 1,000 (0.531)        | <b>5 fewer per 1,000 (0.005)</b><br>(111 fewer to 133 more) |
| <b>Physician global, 24 weeks</b>         |                      |               |              |             |                  |                             |                                |                                 |                                                              |                              |                                                             |
| 284 (1 observational study)               | serious <sup>a</sup> | not serious   | not serious  | not serious | none             | ⊕⊕○○<br>LOW                 | 98 patients<br>MD -24.7 (21.4) | 186 patients<br>MD -22.2 (22.3) | -                                                            |                              | <b>MD 2.5 higher</b><br>(2.81 lower to 7.81 higher)         |

CI: Confidence interval; RR: Risk ratio; MD: Mean difference

a. Selection bias and confounding by indication

Working Group quality of evidence categories:

**High quality:** We are very confident that the true effect lies close to that of the estimate of the effect

**Moderate quality:** We are moderately confident in the effect estimate: The true effect is likely to be close to the estimate of the effect, but there is a possibility that it is substantially different

**Low quality:** Our confidence in the effect estimate is limited: The true effect may be substantially different from the estimate of the effect

**Very low quality:** We have very little confidence in the effect estimate: The true effect is likely to be substantially different from the estimate of effect

## References

1. Combe B, Behrens F, McHugh N, Brock F, Kerkmann U, Kola B, et al. Comparison of Etanercept Monotherapy and Combination Therapy with Methotrexate in Psoriatic Arthritis: Results from 2 Clinical Trials. *J Rheumatol*. 2016;43(6):1063-1067.
2. Zachariae C, Mork NJ, Reunala T, Lorentzen H, Falk E, Karvonen SL, et al. The combination of etanercept and methotrexate increases the effectiveness of treatment in active psoriasis despite inadequate effect of methotrexate therapy. *Acta Derm Venereol*. 2008;88(5):495-501.
3. Gottlieb AB, Langley RG, Strober BE, Papp KA, Klekotka P, Creamer K, et al. A randomized, double-blind, placebo-controlled study to evaluate the addition of methotrexate to etanercept in patients with moderate to severe plaque psoriasis. *Br J Dermatol*. 2012;167(3):649-657.
4. Fagerli KM, Lie E, van der Heijde D, Heiberg MS, Lexberg AS, Rodevand E, et al. The role of methotrexate co-medication in TNF-inhibitor treatment in patients with psoriatic arthritis: results from 440 patients included in the NOR-DMARD study. *Ann Rheum Dis*. 2014;73(1):132-137.

**PICO 20. In adult patients with active PsA despite treatment with an OSM, what are the benefits and harms of switching to MTX and IL12/23i combination therapy compared to switching to IL12/23i monotherapy?**

Summary: The literature searches did not identify any studies that addressed this PICO question.

Quality of evidence across all critical outcomes: Very low

**PICO 21. In adult patients with active PsA despite treatment with an OSM, what are the benefits and harms of switching to MTX and IL17i combination therapy compared to switching to IL17i monotherapy?**

Summary: The literature searches did not identify any studies that addressed this PICO question.

Quality of evidence across all critical outcomes: Very low

**PICO 22. In adult patients with active PsA despite treatment with an OSM, what are the benefits and harms of switching to another OSM monotherapy compared to adding another OSM?**

Summary: This PICO question was addressed by indirect comparisons in three RCTs.[1-3] All trials had placebo groups that continued to receive whatever prior OSMs they had been receiving, rather than being switched to a new OSM. One RCT comparing MTX and cyclosporine combination therapy with MTX monotherapy plus placebo reported no statistically significant difference in nausea, but there was imprecision in the effect size estimate.[1] Two RCTs comparing apremilast with placebo included a subgroup analysis of patients receiving other OSMs concomitantly with apremilast or placebo. Together these subgroup analyses found a statistically significant difference favoring apremilast over placebo for one efficacy outcome (ACR20) at 16 weeks.[2,3]

Quality of evidence across all critical outcomes: Low

| <b>MTX compared to MTX + Cyclosporine (CSA) for PsA patients who failed OSM</b><br>Bibliography: PICO 22: OSM monotherapy versus combination OSM for PsA patients failed OSM. |              |               |                      |                      |                  |                             |                       |                    |                                  |                              |                                                             |
|-------------------------------------------------------------------------------------------------------------------------------------------------------------------------------|--------------|---------------|----------------------|----------------------|------------------|-----------------------------|-----------------------|--------------------|----------------------------------|------------------------------|-------------------------------------------------------------|
| Quality assessment                                                                                                                                                            |              |               |                      |                      |                  |                             | Summary of findings   |                    |                                  |                              |                                                             |
| No of participants (studies)<br>Follow-up                                                                                                                                     | Risk of bias | Inconsistency | Indirectness         | Imprecision          | Publication bias | Overall quality of evidence | Study event rates (%) |                    | Relative effect (95% CI)         | Anticipated absolute effects |                                                             |
|                                                                                                                                                                               |              |               |                      |                      |                  |                             | With MTX + CSA        | With MTX + placebo |                                  | Risk with MTX + CSA          | Risk difference with MTX + placebo                          |
| <b>Nausea, 52 weeks</b>                                                                                                                                                       |              |               |                      |                      |                  |                             |                       |                    |                                  |                              |                                                             |
| 72 (1 RCT)                                                                                                                                                                    | not serious  | not serious   | serious <sup>a</sup> | serious <sup>b</sup> | none             | ⊕⊕○○<br>LOW                 | 15/38 (39.5%)         | 6/34 (17.6%)       | <b>RR 0.45</b><br>(0.20 to 1.02) | 395 per 1,000 (0.395)        | <b>217 fewer per 1,000 (0.217)</b><br>(316 fewer to 8 more) |

**CI:** Confidence interval; **RD:** Risk difference

a. All patients had failed to have a partial response to MTX prior to enrollment, so patients in the MTX + placebo group were not “switched” to MTX.

b. Small study that does not meet optimal information size, wide CI



## Apremilast plus other OSMs compared to placebo plus other OSMs for PsA patients who failed OSM

Bibliography: PICO 22: OSM monotherapy versus combination OSM for PsA patients failed OSM.

| Quality assessment                        |                      |               |                      |             |                  |                             | Summary of findings   |                             |                                                                              |                              |                                                            |
|-------------------------------------------|----------------------|---------------|----------------------|-------------|------------------|-----------------------------|-----------------------|-----------------------------|------------------------------------------------------------------------------|------------------------------|------------------------------------------------------------|
| Nº of participants (studies)<br>Follow-up | Risk of bias         | Inconsistency | Indirectness         | Imprecision | Publication bias | Overall quality of evidence | Study event rates (%) |                             | Relative effect (95% CI)                                                     | Anticipated absolute effects |                                                            |
|                                           |                      |               |                      |             |                  |                             | With placebo + OSM    | With apremilast + other OSM |                                                                              | Risk with placebo            | Risk difference with apremilast                            |
| <b>ACR20, 16 weeks</b>                    |                      |               |                      |             |                  |                             |                       |                             |                                                                              |                              |                                                            |
| 428<br>(2 RCTs)                           | serious <sup>a</sup> | not serious   | serious <sup>b</sup> | not serious | none             | ⊕⊕○○<br>LOW                 | 45/214<br>(21.0%)     | 83/214<br>(38.8%)           | <b>RR 1.84</b><br>(1.35 to 2.51)<br><br><b>Favors apremilast + other OSM</b> | 210 per 1,000<br>(0.210)     | <b>177 more per 1,000 (0.177)</b><br>(74 more to 318 more) |

**CI:** Confidence interval; **RR:** Risk ratio

- a. Unclear randomization, allocation concealment, and blinding of patients/providers/assessors in 1 RCT[2]. Both studies not consistent with calculating outcomes for ITT populations.
- b. Patients in the placebo group were not actually switched to a different OSM, they continued treatment with the same OSM(s).

Working Group quality of evidence categories:

**High quality:** We are very confident that the true effect lies close to that of the estimate of the effect

**Moderate quality:** We are moderately confident in the effect estimate: The true effect is likely to be close to the estimate of the effect, but there is a possibility that it is substantially different

**Low quality:** Our confidence in the effect estimate is limited: The true effect may be substantially different from the estimate of the effect

**Very low quality:** We have very little confidence in the effect estimate: The true effect is likely to be substantially different from the estimate of effect

**References:**

1. Fraser AD, van Kuijk AW, Westhovens R, Karim Z, Wakefield R, Gerards AH, et al. A randomised, double blind, placebo controlled, multicentre trial of combination therapy with methotrexate plus ciclosporin in patients with active psoriatic arthritis. *Ann Rheum Dis.* 2005;64(6):859-864.
2. Cutolo M, Myerson GE, Fleischmann RM, Liote F, Diaz-Gonzalez F, Van den Bosch F, et al. A Phase III, Randomized, Controlled Trial of Apremilast in Patients with Psoriatic Arthritis: Results of the PALACE 2 Trial. *J Rheumatol.* 2016;43(9):1724-1734.
3. Edwards CJ, Blanco FJ, Crowley J, Birbara CA, Jaworski J, Aelion J, et al. Apremilast, an oral phosphodiesterase 4 inhibitor, in patients with psoriatic arthritis and current skin involvement: a phase III, randomised, controlled trial (PALACE 3). *Ann Rheum Dis.* 2016;75(6):1065-1073.

**PICO 23. In adult patients with active PsA despite treatment with an OSM, what are the benefits and harms of switching to a different OSM compared to switching to a TNFi?**

**Summary.** Only one study directly compared a TNFi to an OSM in patients with PsA[1]. This study, which compared cyclosporine and adalimumab, was an unblinded observational study with only partial randomization of enrollees (see footnote in Table 2 for further details). We therefore included two RCTs comparing TNFi to an OSM in patients with psoriasis[2,3] as well as a number of RCTs comparing TNFi or OSM to placebo in patients with PsA. Most of the data presented for this PICO is therefore indirect in nature. Nine RCTs (12 publications) comparing TNFi to placebo were included for this PICO.[4-15] Five RCTs compared OSM to placebo: one compared leflunomide to placebo[16,17], and four compared apremilast to placebo[18-23].

A network meta-analysis was performed to indirectly compare OSMs vs TNFis using the placebo-controlled RCTs noted above (Table 1). Due to considerable heterogeneity in findings among different TNFis for ACR20, HAQ-DI and PASI-75, these drugs were separated in the network meta-analysis. Of individual TNFis, golimumab and infliximab were associated with significantly greater numbers of patients who achieved ACR20 and PASI75 compared to the OSM group. Only adalimumab and infliximab were associated with significantly greater numbers of patients who achieved minimum change in HAQ-DI. The remaining individual TNFis did not show superiority over the OSM group for any outcomes, although imprecision in the findings means that a between-group difference could not be ruled out (data not shown). An updated literature search in March 2018 identified one additional RCT showing superiority of golimumab over placebo[24]. This trial had not been previously reviewed by the panel, but it was moderate quality (due to indirectness) and the results did not change the overall findings or the overall quality of evidence.

The single observational study directly comparing an OSM to a TNFi found cyclosporine to be significantly better than adalimumab for improvement in PASI75. No other outcomes showed significant between-group differences, although there was imprecision in the effect estimates. One RCT of psoriasis patients found a significant benefit of etanercept over 5 mg tofacitinib for improving PASI75 (Table 2).

Adverse events could not be compared using adjusted indirect comparison because the trials of different drug classes did not report similar adverse events. Both apremilast and leflunomide showed a slightly greater risk of causing liver toxicity compared to placebo when combined in a meta-analysis. Apremilast also caused increased GI discomfort compared to placebo (Table 3).

No trial stratified outcomes by history of exposure or failure of OSMs, but a few TNFi vs placebo and apremilast vs placebo RCTs reported outcomes by history of exposure to biologic agents. In the limited data available, TNFi blockers and apremilast seem to work as well in biologic-experienced compared to biologic-naïve patients.

Quality of evidence across all critical outcomes: Moderate

**Table 1. Different OSM compared to TNFi for patients with active PsA despite OSM**

Bibliography: PICO 23: Different OSM compared to TNFi for patients with active PsA despite OSM

| Quality assessment                                            |              |               |                      |             |                  |                             | Summary of findings |      |                                                       |                              |                                                                         |
|---------------------------------------------------------------|--------------|---------------|----------------------|-------------|------------------|-----------------------------|---------------------|------|-------------------------------------------------------|------------------------------|-------------------------------------------------------------------------|
| № of participants (studies) Follow-up                         | Risk of bias | Inconsistency | Indirectness         | Imprecision | Publication bias | Overall quality of evidence |                     |      | Relative effect (95% CI)                              | Anticipated absolute effects |                                                                         |
|                                                               |              |               |                      |             |                  |                             | OSM                 | TNFi |                                                       | Risk with OSM                | Risk difference with TNFi                                               |
| <b>ACR20, 12-24 weeks, network meta-analysis</b>              |              |               |                      |             |                  |                             |                     |      |                                                       |                              |                                                                         |
| 1539 (6 RCTs)                                                 | Not serious  | Not serious   | Serious <sup>a</sup> | Not serious | None             | ⊕⊕⊕○<br>MODERATE            | OSM                 | GOL  | <b>RR 2.60</b><br>(1.29 to 5.26)<br><b>Favors GOL</b> | 380 per 1,000 (0.380)        | <b>321 more per 1000 (0.321)</b><br>(139 more to 456 more) <sup>b</sup> |
| 1638 (8 RCTs)                                                 | Not serious  | Not serious   | Serious <sup>a</sup> | Not serious | None             | ⊕⊕⊕○<br>MODERATE            | OSM                 | IFX  | <b>RR 3.40</b><br>(2.10 to 5.51)<br><b>Favors IFX</b> | 380 per 1,000 (0.380)        | <b>464 more per 1000 (0.464)</b><br>(185 more to 578 more) <sup>b</sup> |
| <b>HAQ-DI<sup>c</sup>, 12-24 weeks, network meta-analysis</b> |              |               |                      |             |                  |                             |                     |      |                                                       |                              |                                                                         |
| 1580 (6 RCTs)                                                 | Not serious  | Not serious   | Serious <sup>a</sup> | Not serious | None             | ⊕⊕⊕○<br>MODERATE            | OSM                 | ADA  | <b>RR 1.43</b><br>(1.06 to 1.94)<br><b>Favors ADA</b> | 394 per 1,000 (0.394)        | <b>169 more per 1000 (0.169)</b><br>(24 more to 370 more)               |

**Table 1. Different OSM compared to TNFi for patients with active PsA despite OSM**

Bibliography: PICO 23: Different OSM compared to TNFi for patients with active PsA despite OSM

| Quality assessment                                 |             |             |                      |             |      |                  | Summary of findings |     |                                                            |                       |                                                                         |
|----------------------------------------------------|-------------|-------------|----------------------|-------------|------|------------------|---------------------|-----|------------------------------------------------------------|-----------------------|-------------------------------------------------------------------------|
| 1367 (5 RCTs)                                      | Not serious | Not serious | Serious <sup>a</sup> | Not serious | None | ⊕⊕⊕○<br>MODERATE | OSM                 | IFX | <b>RR 1.79</b><br>(1.21 to 2.64)<br><br><b>Favors IFX</b>  | 394 per 1,000 (0.394) | <b>224 more per 1000 (0.224)</b><br>(58 more to 367 more) <sup>b</sup>  |
| <b>PASI 75, 12-24 weeks, network meta-analysis</b> |             |             |                      |             |      |                  |                     |     |                                                            |                       |                                                                         |
| 1026 (5 RCTs)                                      | Not serious | Not serious | Serious <sup>a</sup> | Not serious | None | ⊕⊕⊕○<br>MODERATE | OSM                 | GOL | <b>RR 4.74</b><br>(1.07 to 21.01)<br><br><b>Favors GOL</b> | 164 per 1,000 (0.164) | <b>405 more per 1000 (0.405)</b><br>(54 more to 698 more) <sup>b</sup>  |
| 1062 (6 RCTs)                                      | Not serious | Not serious | Serious <sup>a</sup> | Not serious | None | ⊕⊕⊕○<br>MODERATE | OSM                 | IFX | <b>RR 8.23</b><br>(2.14 to 31.65)<br><br><b>Favors IFX</b> | 164 per 1,000 (0.164) | <b>631 more per 1000 (0.631)</b><br>(320 more to 777 more) <sup>b</sup> |

CI: Confidence interval; RR: Risk ratio

- Indirect comparison, all studies compared drug to placebo, only 50-75% of patients had prior OSM exposure.
- Absolute risk differences calculated from odds ratios obtained using the Bucher method.
- HAQ-DI measured as proportion of patients who achieved minimum clinically important improvement (>0.3 or 0.35 in different studies).

**Table 2. OSM compared to TNFi for patients with active PsA despite OSM**

Bibliography: PICO 23: In patients with active PsA despite OSM, benefit/harm of switching to different OSM compared to TNFi.

| Quality assessment                                   |                      |               |                      |                      |                  |                             | Summary of findings   |                    |                                                       |                              |                                                                |
|------------------------------------------------------|----------------------|---------------|----------------------|----------------------|------------------|-----------------------------|-----------------------|--------------------|-------------------------------------------------------|------------------------------|----------------------------------------------------------------|
| № of participants (studies)<br>Follow-up             | Risk of bias         | Inconsistency | Indirectness         | Imprecision          | Publication bias | Overall quality of evidence | Study event rates (%) |                    | Relative effect (95% CI)                              | Anticipated absolute effects |                                                                |
|                                                      |                      |               |                      |                      |                  |                             | With TNFi             | With OSM           |                                                       | Risk with TNFi               | Risk difference with OSM                                       |
| <b>ACR20 - Cyclosporine vs TNFi (Adalimumab)</b>     |                      |               |                      |                      |                  |                             |                       |                    |                                                       |                              |                                                                |
| 115<br>(1 study)                                     | serious <sup>a</sup> | not serious   | not serious          | serious <sup>c</sup> | none             | ⊕⊕○○<br>LOW                 | 45/58<br>(77.6%)      | 36/57<br>(63.2%)   | <b>RR 0.81</b><br>(0.64 to 1.04)                      | 776 per 1,000<br>(0.776)     | <b>147 fewer per 1,000 (0.147)</b><br>(279 fewer to 31 more)   |
| <b>PASI 75 – Apremilast versus TNFi (Etanercept)</b> |                      |               |                      |                      |                  |                             |                       |                    |                                                       |                              |                                                                |
| 166<br>(1 RCT)                                       | not serious          | not serious   | serious <sup>a</sup> | serious <sup>b</sup> | none             | ⊕⊕○○<br>LOW                 | 40/83<br>(48.2%)      | 33/83<br>(39.8%)   | <b>RR 0.82</b><br>(0.58 to 1.17)                      | 482 per 1,000                | <b>87 fewer per 1,000 (0.194)</b><br>(202 fewer to 82 more)    |
| <b>PASI-75 - Tofacitinib vs TNFi (Etanercept)</b>    |                      |               |                      |                      |                  |                             |                       |                    |                                                       |                              |                                                                |
| 664<br>(1 RCT)                                       | not serious          | not serious   | serious <sup>b</sup> | not serious          | none             | ⊕⊕⊕○<br>MODERATE            | 197/335<br>(58.8%)    | 130/329<br>(39.5%) | <b>RR 0.67</b><br>(0.57 to 0.79)<br><b>Favors ETN</b> | 588 per 1,000<br>(0.588)     | <b>194 fewer per 1,000 (0.194)</b><br>(253 fewer to 123 fewer) |
| <b>PASI-75 - Cyclosporine vs TNFi (Adalimumab)</b>   |                      |               |                      |                      |                  |                             |                       |                    |                                                       |                              |                                                                |

**Table 2. OSM compared to TNFi for patients with active PsA despite OSM**  
**Bibliography: PICO 23: In patients with active PsA despite OSM, benefit/harm of switching to different OSM compared to TNFi.**

| Quality assessment                                                    |                      |             |                      |                      |      | Summary of findings |                  |                  |                                  |                          |                                                              |
|-----------------------------------------------------------------------|----------------------|-------------|----------------------|----------------------|------|---------------------|------------------|------------------|----------------------------------|--------------------------|--------------------------------------------------------------|
| 84<br>(1 study)                                                       | serious <sup>a</sup> | not serious | not serious          | serious <sup>c</sup> | none | ⊕⊕○○<br>LOW         | 9/43<br>(20.9%)  | 18/41<br>(43.9%) | <b>RR 2.10</b><br>(1.07 to 4.12) | 209 per 1,000<br>(0.209) | <b>230 more per 1,000 (0.230)</b><br>(15 more to 653 more)   |
| <b>HAQ-DI<sup>d</sup> - Cyclosporine vs TNFi (Adalimumab)</b>         |                      |             |                      |                      |      |                     |                  |                  |                                  |                          |                                                              |
| 115<br>(1 RCT)                                                        | serious <sup>a</sup> | not serious | not serious          | serious <sup>c</sup> | none | ⊕⊕○○<br>LOW         | 43/58<br>(74.1%) | 33/57<br>(57.9%) | <b>RR 0.78</b><br>(0.60 to 1.02) | 741 per 1,000<br>(0.741) | <b>163 fewer per 1,000 (0.163)</b><br>(297 fewer to 15 more) |
| <b>Serious adverse events - Tofacitinib vs TNFi (Etanercept)</b>      |                      |             |                      |                      |      |                     |                  |                  |                                  |                          |                                                              |
| 664<br>(1 RCT)                                                        | not serious          | not serious | serious <sup>b</sup> | not serious          | none | ⊕⊕⊕○<br>MODERATE    | 7/335<br>(2.1%)  | 7/329<br>(2.1%)  | <b>RR 1.02</b><br>(0.36 to 2.87) | 21 per 1,000<br>(0.021)  | <b>0 more per 1,000</b><br>(13 fewer to 39 more)             |
| <b>Liver toxicity<sup>e</sup> - Cyclosporine vs TNFi (Adalimumab)</b> |                      |             |                      |                      |      |                     |                  |                  |                                  |                          |                                                              |
| 115<br>(1 study)                                                      | serious <sup>a</sup> | not serious | not serious          | serious <sup>c</sup> | none | ⊕⊕○○<br>LOW         | 5/58<br>(8.6%)   | 3/57<br>(5.3%)   | <b>RR 0.61</b><br>(0.15 to 2.44) | 86 per 1,000<br>(0.086)  | <b>34 fewer per 1,000 (0.034)</b><br>(73 fewer to 124 more)  |

**Table 2. OSM compared to TNFi for patients with active PsA despite OSM**  
**Bibliography: PICO 23: In patients with active PsA despite OSM, benefit/harm of switching to different OSM compared to TNFi.**

| Quality assessment                     |             |             |                      |             |      | Summary of findings |                 |                 |                                  |                        |                                                          |
|----------------------------------------|-------------|-------------|----------------------|-------------|------|---------------------|-----------------|-----------------|----------------------------------|------------------------|----------------------------------------------------------|
| <b>Serious infection - OSM vs TNFi</b> |             |             |                      |             |      |                     |                 |                 |                                  |                        |                                                          |
| 945<br>(3 RCTs)                        | Not serious | not serious | serious <sup>b</sup> | not serious | none | ⊕⊕⊕○<br>MODERATE    | 4/476<br>(0.8%) | 3/469<br>(0.6%) | <b>RR 0.81</b><br>(0.20 to 3.38) | 8 per 1,000<br>(0.008) | <b>2 fewer per 1,000 (0.002)</b><br>(6 fewer to 19 more) |

CI: Confidence interval; RR: Risk ratio

a. The Karanikolas et al 2011 cyclosporine vs adalimumab study[1] is an unblinded clinical trial in which most but not all patients were randomized to treatment groups. Specifically, 76 patients were randomly assigned to cyclosporine, adalimumab, or combination therapy. The remaining 94 patients were not randomly assigned: 32 patients could not receive adalimumab due to insurance restrictions, so they were assigned to cyclosporine. The remaining 62 patients were randomly assigned to adalimumab (32 patients) and combination therapy (30 patients).

b. The Bachelez 2015 tofacitinib vs etanercept RCT[2] and the Reich apremilast vs. etanercept RCT[3] focused on patients with plaque psoriasis, not psoriatic arthritis.

c. Wide CI that crosses line of no effect

d. HAQ-DI measured as proportion of patients who achieved minimum clinically important improvement (>0.3 or 0.35 in different studies).

e. Alanine aminotransferase or aspartate aminotransferase value ≥ 3 times upper limit of normal.

**Table 3. OSM or TNFi compared to placebo for PICO 23: Adverse events**  
**Bibliography: PICO 23: In patients with active PsA despite OSM, benefit/harm of switching to different OSM compared to TNFi.**

| Quality assessment                        |              |               |              |             |                  |                             | Summary of findings   |                  |                          |                              |                                  |
|-------------------------------------------|--------------|---------------|--------------|-------------|------------------|-----------------------------|-----------------------|------------------|--------------------------|------------------------------|----------------------------------|
| Nº of participants (studies)<br>Follow-up | Risk of bias | Inconsistency | Indirectness | Imprecision | Publication bias | Overall quality of evidence | Study event rates (%) |                  | Relative effect (95% CI) | Anticipated absolute effects |                                  |
|                                           |              |               |              |             |                  |                             | With placebo          | With TNFi or OSM |                          | Risk with placebo            | Risk difference with TNFi or OSM |
|                                           |              |               |              |             |                  |                             |                       |                  |                          |                              |                                  |



**Table 3. OSM or TNFi compared to placebo for PICO 23: Adverse events**  
 Bibliography: PICO 23: In patients with active PsA despite OSM, benefit/harm of switching to different OSM compared to TNFi.

| Quality assessment                                                  |             |                      |                      |             |      | Summary of findings |                   |                    |                                                               |                          |                                                            |
|---------------------------------------------------------------------|-------------|----------------------|----------------------|-------------|------|---------------------|-------------------|--------------------|---------------------------------------------------------------|--------------------------|------------------------------------------------------------|
| <b>Serious infections – TNFi vs. placebo</b>                        |             |                      |                      |             |      |                     |                   |                    |                                                               |                          |                                                            |
| 1151<br>(5 RCTs)                                                    | not serious | not serious          | serious <sup>a</sup> | not serious | none | ⊕⊕⊕○<br>MODERATE    | 8/564<br>(1.4%)   | 4/587<br>(0.7%)    | <b>RR 0.54</b><br>(0.17 to 1.77)<br><br><b>No difference</b>  | 14 per 1,000<br>(0.014)  | <b>6 fewer per 1,000 (0.006)</b><br>(12 fewer to 11 more)  |
| <b>Liver toxicity<sup>d</sup> – OSM vs. placebo</b>                 |             |                      |                      |             |      |                     |                   |                    |                                                               |                          |                                                            |
| 1309<br>(5 RCTs)                                                    | not serious | not serious          | serious <sup>a</sup> | not serious | none | ⊕⊕⊕○<br>MODERATE    | 6/652<br>(0.9%)   | 19/657<br>(2.9%)   | <b>RR 2.58</b><br>(1.13 to 5.85)<br><br><b>Favors placebo</b> | 9 per 1,000<br>(0.009)   | <b>15 more per 1,000 (0.015)</b><br>(1 more to 45 more)    |
| <b>GI intolerance (diarrhea and nausea) – OSM vs. placebo</b>       |             |                      |                      |             |      |                     |                   |                    |                                                               |                          |                                                            |
| 1308<br>(5 RCTs)                                                    | not serious | serious <sup>c</sup> | serious <sup>a</sup> | not serious | none | ⊕⊕○○<br>LOW         | 76/646<br>(11.8%) | 220/662<br>(33.2%) | <b>RR 2.71</b><br>(1.62 to 4.52)<br><br><b>Favors placebo</b> | 118 per 1,000<br>(0.118) | <b>202 more per 1,000 (0.169)</b><br>(73 more to 415 more) |
| <b>GI intolerance (diarrhea and nausea) - Apremilast vs placebo</b> |             |                      |                      |             |      |                     |                   |                    |                                                               |                          |                                                            |

**Table 3. OSM or TNFi compared to placebo for PICO 23: Adverse events**  
**Bibliography: PICO 23: In patients with active PsA despite OSM, benefit/harm of switching to different OSM compared to TNFi.**

| Quality assessment |             |         |                      |             |      | Summary of findings |                   |                    |                                                               |                          |                                                            |
|--------------------|-------------|---------|----------------------|-------------|------|---------------------|-------------------|--------------------|---------------------------------------------------------------|--------------------------|------------------------------------------------------------|
| 1120<br>(4 RCTs)   | not serious | serious | serious <sup>a</sup> | not serious | none | ⊕⊕⊕○<br>MODERATE    | 56/554<br>(10.1%) | 188/566<br>(33.2%) | <b>RR 3.15</b><br>(1.79 to 5.54)<br><br><b>Favors placebo</b> | 101 per 1,000<br>(0.101) | <b>217 more per 1,000 (0.217)</b><br>(80 more to 459 more) |

**CI:** Confidence interval; **RR:** Risk ratio

a. Comparison to placebo

b. Wide confidence intervals due to low event rates

c. The study of leflunomide had a RR of 1.53 (0.95-2.48) whereas the studies of apremilast showed a higher risk, with an overall RR of 3.15 (1.79 to 5.54)

d. Studies had slightly different cutoffs for abnormality: ALT ≥1.5 times the upper normal limit (1 study), ALT > 150 u/l (2 studies), ALT >upper normal limit (1 study)

Working Group quality of evidence categories:

**High quality: We are very confident that the true effect lies close to that of the estimate of the effect**

**Moderate quality: We are moderately confident in the effect estimate: The true effect is likely to be close to the estimate of the effect, but there is a possibility that it is substantially different**

**Low quality: Our confidence in the effect estimate is limited: The true effect may be substantially different from the estimate of the effect**

**Very low quality: We have very little confidence in the effect estimate: The true effect is likely to be substantially different from the estimate of effect**

## References:

1. Karanikolas GN, Koukli EM, Katsalira A, Arida A, Petrou D, Komninou E, et al. Adalimumab or cyclosporine as monotherapy and in combination in severe psoriatic arthritis: results from a prospective 12-month nonrandomized unblinded clinical trial. *J Rheumatol.* 2011;38(11):2466-2474.
2. Bachelez H, van de Kerkhof PC, Strohal R, Kubanov A, Valenzuela F, Lee JH, et al. Tofacitinib versus etanercept or placebo in moderate-to-severe chronic plaque psoriasis: a phase 3 randomised non-inferiority trial. *Lancet.* 2015;386(9993):552-561.
3. Reich K, Gooderham M, Green L, Bewley A, Zhang Z, Khanskaya I, et al. The efficacy and safety of apremilast, etanercept and placebo in patients with moderate-to-severe plaque psoriasis: 52-week results from a phase IIIb, randomized, placebo-controlled trial (LIBERATE). *J Eur Acad Dermatol Venereol.* 2017;31(3):507-517.
4. Mease PJ, Fleischmann R, Deodhar AA, Wollenhaupt J, Khraishi M, Kielar D, et al. Effect of certolizumab pegol on signs and symptoms in patients with psoriatic arthritis: 24-week results of a Phase 3 double-blind randomised placebo-controlled study (RAPID-PsA). *Ann Rheum Dis.* 2014;73(1):48-55.

5. Gladman D, Fleischmann R, Coteur G, Woltering F, Mease PJ. Effect of certolizumab pegol on multiple facets of psoriatic arthritis as reported by patients: 24-week patient-reported outcome results of a phase III, multicenter study. *Arthritis Care Res (Hoboken)*. 2014;66(7):1085-1092.
6. Genovese MC, Mease PJ, Thomson GT, Kivitz AJ, Perdok RJ, Weinberg MA, et al. Safety and efficacy of adalimumab in treatment of patients with psoriatic arthritis who had failed disease modifying antirheumatic drug therapy. *J Rheumatol*. 2007;34(5):1040-1050.
7. Mease PJ, Gladman DD, Ritchlin CT, Ruderman EM, Steinfeld SD, Choy EH, et al. Adalimumab for the treatment of patients with moderately to severely active psoriatic arthritis: results of a double-blind, randomized, placebo-controlled trial. *Arthritis Rheum*. 2005;52(10):3279-3289.
8. Gladman DD, Mease PJ, Cifaldi MA, Perdok RJ, Sasso E, Medich J. Adalimumab improves joint-related and skin-related functional impairment in patients with psoriatic arthritis: patient-reported outcomes of the Adalimumab Effectiveness in Psoriatic Arthritis Trial. *Ann Rheum Dis*. 2007;66(2):163-168.
9. Mease PJ, Kivitz AJ, Burch FX, Siegel EL, Cohen SB, Ory P, et al. Etanercept treatment of psoriatic arthritis: safety, efficacy, and effect on disease progression. *Arthritis Rheum*. 2004;50(7):2264-2272.
10. Mease PJ, Woolley JM, Singh A, Tsuji W, Dunn M, Chiou CF. Patient-reported outcomes in a randomized trial of etanercept in psoriatic arthritis. *J Rheumatol*. 2010;37(6):1221-1227.
11. Antoni C, Krueger GG, de Vlam K, Birbara C, Beutler A, Guzzo C, et al. Infliximab improves signs and symptoms of psoriatic arthritis: results of the IMPACT 2 trial. *Ann Rheum Dis*. 2005;64(8):1150-1157.
12. Mease PJ, Goffe BS, Metz J, VanderStoep A, Finck B, Burge DJ. Etanercept in the treatment of psoriatic arthritis and psoriasis: a randomised trial. *Lancet*. 2000;356(9227):385-390.
13. Kavanaugh A, McInnes I, Mease P, Krueger GG, Gladman D, Gomez-Reino J, et al. Golimumab, a new human tumor necrosis factor alpha antibody, administered every four weeks as a subcutaneous injection in psoriatic arthritis: Twenty-four-week efficacy and safety results of a randomized, placebo-controlled study. *Arthritis Rheum*. 2009;60(4):976-986.
14. Antoni CE, Kavanaugh A, Kirkham B, Tutuncu Z, Burmester GR, Schneider U, et al. Sustained benefits of infliximab therapy for dermatologic and articular manifestations of psoriatic arthritis: results from the infliximab multinational psoriatic arthritis controlled trial (IMPACT). *Arthritis Rheum*. 2005;52(4):1227-1236.
15. Torii H, Nakagawa H, Japanese Infliximab Study i. Infliximab monotherapy in Japanese patients with moderate-to-severe plaque psoriasis and psoriatic arthritis. A randomized, double-blind, placebo-controlled multicenter trial. *J Dermatol Sci*. 2010;59(1):40-49.
16. Nash P, Thaci D, Behrens F, Falk F, Kaltwasser JP. Leflunomide improves psoriasis in patients with psoriatic arthritis: an in-depth analysis of data from the TOPAS study. *Dermatology*. 2006;212(3):238-249.
17. Kaltwasser JP, Nash P, Gladman D, Rosen CF, Behrens F, Jones P, et al. Efficacy and safety of leflunomide in the treatment of psoriatic arthritis and psoriasis: a multinational, double-blind, randomized, placebo-controlled clinical trial. *Arthritis Rheum*. 2004;50(6):1939-1950.
18. Strand V, Schett G, Hu C, Stevens RM. Patient-reported Health-related Quality of Life with apremilast for psoriatic arthritis: a phase II, randomized, controlled study. *J Rheumatol*. 2013;40(7):1158-1165.

19. Schett G, Wollenhaupt J, Papp K, Joos R, Rodrigues JF, Vessey AR, et al. Oral apremilast in the treatment of active psoriatic arthritis: results of a multicenter, randomized, double-blind, placebo-controlled study. *Arthritis Rheum.* 2012;64(10):3156-3167.
20. Edwards CJ, Blanco FJ, Crowley J, Birbara CA, Jaworski J, Aelion J, et al. Apremilast, an oral phosphodiesterase 4 inhibitor, in patients with psoriatic arthritis and current skin involvement: a phase III, randomised, controlled trial (PALACE 3). *Ann Rheum Dis.* 2016;75(6):1065-1073.
21. Cutolo M, Myerson GE, Fleischmann RM, Liote F, Diaz-Gonzalez F, Van den Bosch F, et al. A Phase III, Randomized, Controlled Trial of Apremilast in Patients with Psoriatic Arthritis: Results of the PALACE 2 Trial. *J Rheumatol.* 2016;43(9):1724-1734.
22. Kavanaugh A, Mease PJ, Gomez-Reino JJ, Adebajo AO, Wollenhaupt J, Gladman DD, et al. Longterm (52-week) results of a phase III randomized, controlled trial of apremilast in patients with psoriatic arthritis. *J Rheumatol.* 2015;42(3):479-488.
23. Kavanaugh A, Mease PJ, Gomez-Reino JJ, Adebajo AO, Wollenhaupt J, Gladman DD, et al. Treatment of psoriatic arthritis in a phase 3 randomised, placebo-controlled trial with apremilast, an oral phosphodiesterase 4 inhibitor. *Ann Rheum Dis.* 2014;73(6):1020-1026.
24. Kavanaugh A, Husni ME, Harrison DD, Kim L, Lo KH, Leu JH, Hsia EC. Safety and efficacy of intravenous golimumab in patients with active psoriatic arthritis. *Arth Rheum.* 2017;69(11):2151-2161.

**PICO 24. In adult patients with active PsA despite treatment with an OSM, what are the benefits and harms of switching to a different OSM compared to switching to an IL12/23i?**

**Summary.** No studies directly compared IL12/23i with an OSM. Eight placebo-controlled RCTs provided indirect evidence for this question: three RCTs of ustekinumab[1-3], and 5 RCTs of OSMs (apremilast, 4 RCTs[4-9], and leflunomide, 1 RCT[10,11]). A majority of patients in most studies had a history of OSM use. None of the studies stratified outcomes by history of OSM use, which also contributes to indirectness of the data relative to the PICO question. For all studies we used data for drug dosages that were closest to standard clinical practice.

A network meta-analysis was performed to indirectly compare OSMs vs IL12/23i using the placebo-controlled RCTs noted above. The meta-analysis found a significant difference favoring IL12/23i for HAQ-DI, but no significant between-class differences in ACR20 or PASI 75 outcomes (these findings were inconclusive due to imprecision in the wide CIs that cross the line of no effect) (Table 1).

Adverse events could not be compared using adjusted indirect comparison because the trials of different drug classes did not report similar adverse events. Ustekinumab trials reported rates of infection while OSM trials reported liver toxicity and gastrointestinal (GI) discomfort. Comparing adverse events in drug versus placebo groups, ustekinumab did not demonstrate any increase in severe infection rates compared to placebo. Both apremilast and leflunomide showed a slightly greater risk of causing liver toxicity compared to placebo when combined in a meta-analysis. Apremilast also caused increased GI discomfort compared to placebo (Table 2).

Quality of evidence across all critical outcomes: Low

| <b>Table 1. Different OSM compared to IL12/23i for patients with active PsA despite OSM</b>        |              |               |              |             |                  |                             |                     |          |                          |                              |                               |
|----------------------------------------------------------------------------------------------------|--------------|---------------|--------------|-------------|------------------|-----------------------------|---------------------|----------|--------------------------|------------------------------|-------------------------------|
| Bibliography: PICO 24: Different OSM compared to IL12/23i for patients with active PsA despite OSM |              |               |              |             |                  |                             |                     |          |                          |                              |                               |
| Quality assessment                                                                                 |              |               |              |             |                  |                             | Summary of findings |          |                          |                              |                               |
| No of participants (studies)<br>Follow-up                                                          | Risk of bias | Inconsistency | Indirectness | Imprecision | Publication bias | Overall quality of evidence |                     |          | Relative effect (95% CI) | Anticipated absolute effects |                               |
|                                                                                                    |              |               |              |             |                  |                             | OSM                 | IL12/23i |                          | Risk with OSM                | Risk difference with IL12/23i |
| <b>ACR20, 12-24 weeks, network meta-analysis</b>                                                   |              |               |              |             |                  |                             |                     |          |                          |                              |                               |

**Table 1. Different OSM compared to IL12/23i for patients with active PsA despite OSM**

Bibliography: PICO 24: Different OSM compared to IL12/23i for patients with active PsA despite OSM

| Quality assessment                                            |             |             |                      |                      |      |                  | Summary of findings |          |                                                     |                          |                                                            |
|---------------------------------------------------------------|-------------|-------------|----------------------|----------------------|------|------------------|---------------------|----------|-----------------------------------------------------|--------------------------|------------------------------------------------------------|
| 2353 (8 RCTs)                                                 | Not serious | Not serious | Serious <sup>a</sup> | Serious <sup>b</sup> | None | ⊕⊕○○<br>LOW      | OSM                 | IL12/23i | RR 1.06<br>(0.67 to 1.70)                           | 380 per 1,000<br>(0.380) | <b>23 more per 1000 (0.023)</b><br>(125 fewer to 266 more) |
| <b>HAQ-DI<sup>c</sup>, 12-24 weeks, network meta-analysis</b> |             |             |                      |                      |      |                  |                     |          |                                                     |                          |                                                            |
| 2233 (7 RCTs)                                                 | Not serious | Not serious | Serious <sup>a</sup> | Not serious          | None | ⊕⊕⊕○<br>MODERATE | OSM                 | IL12/23i | RR 1.37<br>(1.00 to 1.88)<br><b>Favors IL12/23i</b> | 394 per 1,000<br>(0.394) | <b>146 more per 1,000 (0.146)</b> (0 more to 347 more)     |
| <b>PASI 75, 12-24 weeks, network meta-analysis</b>            |             |             |                      |                      |      |                  |                     |          |                                                     |                          |                                                            |
| 1637 (7 RCTs)                                                 | Not serious | Not serious | Serious <sup>a</sup> | Serious <sup>b</sup> | None | ⊕⊕○○<br>LOW      | OSM                 | IL12/23i | RR 2.01<br>(0.70 to 5.76)                           | 164 per 1,000<br>(0.164) | <b>166 more per 1000 (0.166)</b><br>(49 fewer to 781 more) |

CI: Confidence interval; RR: Risk ratio

- Indirect comparison, all studies compared drug to placebo, in most studies only 50-75% of patients had prior OSM exposure.
- Wide CI that overlaps line of no difference
- HAQ-DI measured as proportion of patients who achieved minimum clinically important improvement (>0.3 or 0.35 in different studies).

**Table 2. OSM (apremilast or leflunomide) or IL12/23i compared to placebo for PICO 24:  
Adverse events**

Bibliography: PICO 24: In patients with active PsA despite OSM, benefit/harm of switching to different OSM compared to IL-12/23i.

| Quality assessment                                            |              |               |                      |             |                  |                             | Summary of findings   |               |                                                               |                              |                                                         |
|---------------------------------------------------------------|--------------|---------------|----------------------|-------------|------------------|-----------------------------|-----------------------|---------------|---------------------------------------------------------------|------------------------------|---------------------------------------------------------|
| № of participants (studies) Follow-up                         | Risk of bias | Inconsistency | Indirectness         | Imprecision | Publication bias | Overall quality of evidence | Study event rates (%) |               | Relative effect (95% CI)                                      | Anticipated absolute effects |                                                         |
|                                                               |              |               |                      |             |                  |                             | With placebo          | With drug     |                                                               | Risk with placebo            | Risk difference with OSM                                |
| <b>Serious infections – Ustekinumab vs. placebo</b>           |              |               |                      |             |                  |                             |                       |               |                                                               |                              |                                                         |
| 925 (2 RCTs)                                                  | not serious  | serious       | serious <sup>a</sup> | not serious | none             | ⊕⊕⊕○<br>MODERATE            | 2/309 (0.6%)          | 4/616 (0.6%)  | <b>RR 0.84</b><br>(0.20 to 3.50)<br><br><b>No difference</b>  | 6 per 1,000 (0.006)          | <b>1 fewer per 1,000</b><br>(5 fewer to 15 more)        |
| <b>Liver toxicity<sup>d</sup> – OSM vs. placebo</b>           |              |               |                      |             |                  |                             |                       |               |                                                               |                              |                                                         |
| 1309 (5 RCTs)                                                 | not serious  | not serious   | serious <sup>a</sup> | not serious | none             | ⊕⊕⊕○<br>MODERATE            | 6/652 (0.9%)          | 19/657 (2.9%) | <b>RR 2.58</b><br>(1.13 to 5.85)<br><br><b>Favors placebo</b> | 9 per 1,000 (0.009)          | <b>15 more per 1,000 (0.015)</b><br>(1 more to 45 more) |
| <b>GI intolerance (diarrhea and nausea) – OSM vs. placebo</b> |              |               |                      |             |                  |                             |                       |               |                                                               |                              |                                                         |

**Table 2. OSM (apremilast or leflunomide) or IL12/23i compared to placebo for PICO 24:  
Adverse events**

**Bibliography: PICO 24: In patients with active PsA despite OSM, benefit/harm of switching to different OSM compared to IL-12/23i.**

| Quality assessment                                                  |             |                      |                      |             |      |                  | Summary of findings |                    |                                                               |                          |                                                            |
|---------------------------------------------------------------------|-------------|----------------------|----------------------|-------------|------|------------------|---------------------|--------------------|---------------------------------------------------------------|--------------------------|------------------------------------------------------------|
| 1308<br>(5 RCTs)                                                    | not serious | serious <sup>c</sup> | serious <sup>a</sup> | not serious | none | ⊕⊕○○<br>LOW      | 76/646<br>(11.8%)   | 220/662<br>(33.2%) | <b>RR 2.71</b><br>(1.62 to 4.52)<br><br><b>Favors placebo</b> | 118 per 1,000<br>(0.118) | <b>202 more per 1,000 (0.169)</b><br>(73 more to 415 more) |
| <b>GI intolerance (diarrhea and nausea) - Apremilast vs placebo</b> |             |                      |                      |             |      |                  |                     |                    |                                                               |                          |                                                            |
| 1120<br>(4 RCTs)                                                    | not serious | not serious          | serious <sup>a</sup> | not serious | none | ⊕⊕⊕○<br>MODERATE | 56/554<br>(10.1%)   | 188/566<br>(33.2%) | <b>RR 3.15</b><br>(1.79 to 5.54)<br><br><b>Favors placebo</b> | 101 per 1,000<br>(0.101) | <b>217 more per 1,000 (0.217)</b><br>(80 more to 459 more) |

**CI:** Confidence interval; **RR:** Risk ratio

a. Comparison to placebo

b. Wide confidence intervals due to low event rate in both groups

c. The study of leflunomide had a RR of 1.53 (0.95-2.48) whereas the studies on apremilast showed a higher risk, with an overall of 3.15 (1.79-5.54)

d. Studies had slightly different cutoffs for abnormality: ALT ≥1.5 times the upper normal limit (1 study), ALT > 150 u/l (2 studies), ALT >upper normal limit (1 study)

Working Group quality of evidence categories:

**High quality: We are very confident that the true effect lies close to that of the estimate of the effect**

**Moderate quality: We are moderately confident in the effect estimate: The true effect is likely to be close to the estimate of the effect, but there is a possibility that it is substantially different**

**Low quality: Our confidence in the effect estimate is limited: The true effect may be substantially different from the estimate of the effect**

**Very low quality: We have very little confidence in the effect estimate: The true effect is likely to be substantially different from the estimate of effect**

**References:**



1. McInnes IB, Kavanaugh A, Gottlieb AB, Puig L, Rahman P, Ritchlin C, et al. Efficacy and safety of ustekinumab in patients with active psoriatic arthritis: 1 year results of the phase 3, multicentre, double-blind, placebo-controlled PSUMMIT 1 trial. *Lancet*. 2013;382(9894):780-789.
2. Ritchlin C, Rahman P, Kavanaugh A, McInnes IB, Puig L, Li S, et al. Efficacy and safety of the anti-IL-12/23 p40 monoclonal antibody, ustekinumab, in patients with active psoriatic arthritis despite conventional non-biological and biological anti-tumour necrosis factor therapy: 6-month and 1-year results of the phase 3, multicentre, double-blind, placebo-controlled, randomised PSUMMIT 2 trial. *Ann Rheum Dis*. 2014;73(6):990-999.
3. Gottlieb A, Menter A, Mendelsohn A, Shen YK, Li S, Guzzo C, et al. Ustekinumab, a human interleukin 12/23 monoclonal antibody, for psoriatic arthritis: randomised, double-blind, placebo-controlled, crossover trial. *Lancet*. 2009;373(9664):633-640.
4. Cutolo M, Myerson GE, Fleischmann RM, Liote F, Diaz-Gonzalez F, Van den Bosch F, et al. A Phase III, Randomized, Controlled Trial of Apremilast in Patients with Psoriatic Arthritis: Results of the PALACE 2 Trial. *J Rheumatol*. 2016;43(9):1724-1734.
5. Strand V, Schett G, Hu C, Stevens RM. Patient-reported Health-related Quality of Life with apremilast for psoriatic arthritis: a phase II, randomized, controlled study. *J Rheumatol*. 2013;40(7):1158-1165.
6. Schett G, Wollenhaupt J, Papp K, Joos R, Rodrigues JF, Vessey AR, et al. Oral apremilast in the treatment of active psoriatic arthritis: results of a multicenter, randomized, double-blind, placebo-controlled study. *Arthritis Rheum*. 2012;64(10):3156-3167.
7. Kavanaugh A, Mease PJ, Gomez-Reino JJ, Adebajo AO, Wollenhaupt J, Gladman DD, et al. Longterm (52-week) results of a phase III randomized, controlled trial of apremilast in patients with psoriatic arthritis. *J Rheumatol*. 2015;42(3):479-488.
8. Kavanaugh A, Mease PJ, Gomez-Reino JJ, Adebajo AO, Wollenhaupt J, Gladman DD, et al. Treatment of psoriatic arthritis in a phase 3 randomised, placebo-controlled trial with apremilast, an oral phosphodiesterase 4 inhibitor. *Ann Rheum Dis*. 2014;73(6):1020-1026.
9. Edwards CJ, Blanco FJ, Crowley J, Birbara CA, Jaworski J, Aelion J, et al. Apremilast, an oral phosphodiesterase 4 inhibitor, in patients with psoriatic arthritis and current skin involvement: a phase III, randomised, controlled trial (PALACE 3). *Ann Rheum Dis*. 2016;75(6):1065-1073.
10. Nash P, Thaci D, Behrens F, Falk F, Kaltwasser JP. Leflunomide improves psoriasis in patients with psoriatic arthritis: an in-depth analysis of data from the TOPAS study. *Dermatology*. 2006;212(3):238-249.
11. Kaltwasser JP, Nash P, Gladman D, Rosen CF, Behrens F, Jones P, et al. Efficacy and safety of leflunomide in the treatment of psoriatic arthritis and psoriasis: a multinational, double-blind, randomized, placebo-controlled clinical trial. *Arthritis Rheum*. 2004;50(6):1939-1950.

**PICO 25. In adult patients with active PsA despite treatment with an OSM, what are the benefits and harms of switching to a different OSM monotherapy compared to switching to an IL17i?**

**Summary:** This PICO was addressed indirectly by 16 double-blind RCTs. Eight studies involving PsA patients or psoriasis patients compared IL17i to placebo.[1-8] One study compared IL17i to TNFi.[8] The outcomes measured when available were ACR20, PASI-75, HAQ-DI, and adverse events. All drugs showed statistically significant improvements in ACR20, PASI-75, and HAQ-DI over placebo (data not shown), with no significant between-group difference in adverse events. Eight studies involving PsA patients compared OSMs (apremilast and leflunomide) to placebo.[9-16] Both OSMs showed statistically significant improvements in ACR20, PASI-75, and HAQ-DI over placebo (data not shown). Liver toxicity was significantly greater in patients receiving OSM compared to placebo. GI intolerance did not differ significantly between leflunomide and placebo patients, but a significantly increased risk appeared among patients receiving apremilast compared to patients receiving placebo (Table 2).

A network meta-analysis was performed to indirectly compare OSMs vs IL17is using the placebo-controlled RCTs noted above (Table 1). Although the meta-analysis found no significant difference between drug classes for ACR20 and HAQ DI, the findings are inconclusive due to imprecision in the effect estimates. For PASI75, although heterogeneity was detected among studies of secukinumab, the findings showed a significant benefit of IL17is over OSMs for improvement in this outcome. Although there was no substantial heterogeneity among IL17i studies for ACR20, the effect sizes were larger in trials of secukinumab compared to trials of ixekizumab and brodalumab. Therefore, we used the Bucher adjusted indirect comparison method to compare OSMs to secukinumab alone. This analysis found a significant benefit of secukinumab over OSMs for improvement in ACR20.

Quality of evidence across all critical outcomes: Low

| <b>Table 1. Different OSM compared to IL17i for patients with active PsA despite OSM</b>        |              |               |              |             |                  |                             |                     |       |                          |                              |                            |
|-------------------------------------------------------------------------------------------------|--------------|---------------|--------------|-------------|------------------|-----------------------------|---------------------|-------|--------------------------|------------------------------|----------------------------|
| Bibliography: PICO 25: Different OSM compared to IL17i for patients with active PsA despite OSM |              |               |              |             |                  |                             |                     |       |                          |                              |                            |
| Quality assessment                                                                              |              |               |              |             |                  |                             | Summary of findings |       |                          |                              |                            |
| No of participants (studies)<br>Follow-up                                                       | Risk of bias | Inconsistency | Indirectness | Imprecision | Publication bias | Overall quality of evidence |                     |       | Relative effect (95% CI) | Anticipated absolute effects |                            |
|                                                                                                 |              |               |              |             |                  |                             | OSM                 | IL17i |                          | Risk with OSM                | Risk difference with IL17i |
| <b>ACR20, 12-24 weeks, network meta-analysis</b>                                                |              |               |              |             |                  |                             |                     |       |                          |                              |                            |

**Table 1. Different OSM compared to IL17i for patients with active PsA despite OSM**

Bibliography: PICO 25: Different OSM compared to IL17i for patients with active PsA despite OSM

| Quality assessment                                                                      |             |             |                      |                      |      |                  | Summary of findings |       |                                                  |                          |                                                        |
|-----------------------------------------------------------------------------------------|-------------|-------------|----------------------|----------------------|------|------------------|---------------------|-------|--------------------------------------------------|--------------------------|--------------------------------------------------------|
| 2162 (11 RCTs)                                                                          | Not serious | Not serious | Serious <sup>a</sup> | Serious <sup>b</sup> | None | ⊕⊕○○<br>LOW      | OSM                 | IL17i | RR 1.19<br>(0.71 to 2.00)                        | 386 per 1,000<br>(0.386) | 73 more per 1000<br>(0.073)<br>(112 fewer to 386 more) |
| <b>ACR20, 12-24 weeks, Bucher adjusted indirect comparison – OSM versus Secukinumab</b> |             |             |                      |                      |      |                  |                     |       |                                                  |                          |                                                        |
| 1828 (8 RCTs)                                                                           | Not serious | Not serious | Serious <sup>a</sup> | Not serious          | None | ⊕⊕⊕○<br>MODERATE | OSM                 | SEC   | RR 1.49<br>(1.07 to 2.09)<br><b>Favors SEC</b>   | 386 per 1,000<br>(0.386) | 189 more per 1000<br>(0.189) (27 more to 421 more)     |
| <b>HAQ-DI<sup>c</sup>, 12-24 weeks, network meta-analysis</b>                           |             |             |                      |                      |      |                  |                     |       |                                                  |                          |                                                        |
| 2014 (8 RCTs)                                                                           | Not serious | Not serious | Serious <sup>a</sup> | Serious <sup>b</sup> | None | ⊕⊕○○<br>LOW      | OSM                 | IL17i | RR 1.11<br>(0.82 to 1.52)                        | 394 per 1,000<br>(0.394) | 43 more per 1000<br>(0.043)<br>(71 fewer to 205 more)  |
| <b>PASI 75, 12-24 weeks, network meta-analysis</b>                                      |             |             |                      |                      |      |                  |                     |       |                                                  |                          |                                                        |
| 1576 (8 RCTs)                                                                           | Not serious | Not serious | Serious <sup>a</sup> | Not serious          | None | ⊕⊕⊕○<br>MODERATE | OSM                 | IL17i | RR 2.41<br>(1.02 to 5.74)<br><b>Favors IL17i</b> | 164 per 1,000<br>(0.164) | 231 more per 1000<br>(0.231) (3 more to 777 more)      |

**CI:** Confidence interval; **RR:** Risk ratio

- a. Indirect comparison, all studies compared drug to placebo, only 50-75% of patients had prior OSM exposure.
- b. Wide CI that overlaps line of no difference
- c. HAQ-DI measured as proportion of patients who achieved minimum clinically important improvement (>0.3 or 0.35 in different studies).

| <b>Table 2. OSM (apremilast or leflunomide) or IL17i compared to placebo for PICO 25: Adverse events</b><br>Bibliography: PICO 25: In patients with active PsA despite OSM, benefit/harm of switching to different OSM compared to IL-17i. |              |               |                      |                      |                  |                             |                       |                   |                                                           |                              |                                                         |
|--------------------------------------------------------------------------------------------------------------------------------------------------------------------------------------------------------------------------------------------|--------------|---------------|----------------------|----------------------|------------------|-----------------------------|-----------------------|-------------------|-----------------------------------------------------------|------------------------------|---------------------------------------------------------|
| Quality assessment                                                                                                                                                                                                                         |              |               |                      |                      |                  |                             | Summary of findings   |                   |                                                           |                              |                                                         |
| Nº of participants (studies)<br>Follow-up                                                                                                                                                                                                  | Risk of bias | Inconsistency | Indirectness         | Imprecision          | Publication bias | Overall quality of evidence | Study event rates (%) |                   | Relative effect (95% CI)                                  | Anticipated absolute effects |                                                         |
|                                                                                                                                                                                                                                            |              |               |                      |                      |                  |                             | With placebo          | With IL17i or OSM |                                                           | Risk with placebo            | Risk difference with IL17i or OSM                       |
| <b>Serious infection – IL17i vs. placebo</b>                                                                                                                                                                                               |              |               |                      |                      |                  |                             |                       |                   |                                                           |                              |                                                         |
| 1189 (3 RCTs)                                                                                                                                                                                                                              | not serious  | not serious   | serious <sup>b</sup> | serious <sup>d</sup> | none             | ⊕⊕○○<br>LOW                 | 5/406 (1.2%)          | 18/685 (2.6%)     | <b>RR 1.79</b><br>(0.75 to 4.30)                          | 12 per 1,000 (0.012)         | <b>9 more per 1,000 (0.009)</b><br>(3 fewer to 52 more) |
| <b>Liver toxicity<sup>d</sup> – OSM vs. placebo</b>                                                                                                                                                                                        |              |               |                      |                      |                  |                             |                       |                   |                                                           |                              |                                                         |
| 1309 (5 RCTs)                                                                                                                                                                                                                              | not serious  | not serious   | serious <sup>a</sup> | not serious          | none             | ⊕⊕⊕○<br>MODERATE            | 6/652 (0.9%)          | 19/657 (2.9%)     | <b>RR 2.58</b><br>(1.13 to 5.85)<br><b>Favors placebo</b> | 9 per 1,000 (0.009)          | <b>15 more per 1,000 (0.015)</b><br>(1 more to 45 more) |

| Table 2. OSM (apremilast or leflunomide) or IL17i compared to placebo for PICO 25: Adverse events                              |             |                      |                      |             |      |                     |                   |                    |                                                           |                          |                                                            |
|--------------------------------------------------------------------------------------------------------------------------------|-------------|----------------------|----------------------|-------------|------|---------------------|-------------------|--------------------|-----------------------------------------------------------|--------------------------|------------------------------------------------------------|
| Bibliography: PICO 25: In patients with active PsA despite OSM, benefit/harm of switching to different OSM compared to IL-17i. |             |                      |                      |             |      |                     |                   |                    |                                                           |                          |                                                            |
| Quality assessment                                                                                                             |             |                      |                      |             |      | Summary of findings |                   |                    |                                                           |                          |                                                            |
| GI intolerance (diarrhea and nausea) – OSM vs. placebo                                                                         |             |                      |                      |             |      |                     |                   |                    |                                                           |                          |                                                            |
| 1308<br>(5 RCTs)                                                                                                               | not serious | serious <sup>c</sup> | serious <sup>a</sup> | not serious | none | ⊕⊕○○<br>LOW         | 76/646<br>(11.8%) | 220/662<br>(33.2%) | <b>RR 2.71</b><br>(1.62 to 4.52)<br><b>Favors placebo</b> | 118 per 1,000<br>(0.118) | <b>202 more per 1,000 (0.169)</b><br>(73 more to 415 more) |
| GI intolerance (diarrhea and nausea) - Apremilast vs placebo                                                                   |             |                      |                      |             |      |                     |                   |                    |                                                           |                          |                                                            |
| 1120<br>(4 RCTs)                                                                                                               | not serious | serious              | serious <sup>a</sup> | not serious | none | ⊕⊕⊕○<br>MODERATE    | 56/554<br>(10.1%) | 188/566<br>(33.2%) | <b>RR 3.15</b><br>(1.79 to 5.54)<br><b>Favors placebo</b> | 101 per 1,000<br>(0.101) | <b>217 more per 1,000 (0.217)</b><br>(80 more to 459 more) |

CI: Confidence interval; RR: Risk ratio

a. Comparison to placebo

b. Wide CI that overlaps the line of no effect

c. The study of leflunomide had a RR of 1.53 (0.95-2.48) whereas the studies on apremilast showed a higher risk, with an overall of 3.15 (1.79-5.54)

d. Studies had slightly different cutoffs for abnormality: ALT ≥1.5 times the upper normal limit (1 study), ALT > 150 u/l (2 studies), ALT >upper normal limit (1 study)

Working Group quality of evidence categories:

**High quality: We are very confident that the true effect lies close to that of the estimate of the effect**

**Moderate quality: We are moderately confident in the effect estimate: The true effect is likely to be close to the estimate of the effect, but there is a possibility that it is substantially different**

**Low quality: Our confidence in the effect estimate is limited: The true effect may be substantially different from the estimate of the effect**

**Very low quality: We have very little confidence in the effect estimate: The true effect is likely to be substantially different from the estimate of effect**

References:

1. McInnes IB, Mease PJ, Kirkham B, Kavanaugh A, Ritchlin CT, Rahman P, et al. Secukinumab, a human anti-interleukin-17A monoclonal antibody, in patients with psoriatic arthritis (FUTURE 2): a randomised, double-blind, placebo-controlled, phase 3 trial. *Lancet*. 2015;386(9999):1137-1146.
2. McInnes IB, Sieper J, Braun J, Emery P, van der Heijde D, Isaacs JD, et al. Efficacy and safety of secukinumab, a fully human anti-interleukin-17A monoclonal antibody, in patients with moderate-to-severe psoriatic arthritis: a 24-week, randomised, double-blind, placebo-controlled, phase II proof-of-concept trial. *Ann Rheum Dis*. 2014;73(2):349-356.
3. Mease PJ, McInnes IB, Kirkham B, Kavanaugh A, Rahman P, van der Heijde D, et al. Secukinumab Inhibition of Interleukin-17A in Patients with Psoriatic Arthritis. *N Engl J Med*. 2015;373(14):1329-1339.
4. Papp K, Menter A, Strober B, Kricorian G, Thompson EH, Milmont CE, et al. Efficacy and safety of brodalumab in subpopulations of patients with difficult-to-treat moderate-to-severe plaque psoriasis. *J Am Acad Dermatol*. 2015;72(3):436-439 e431.
5. Mease PJ, van der Heijde D, Ritchlin CT, Okada M, Cuchacovich RS, Shuler CL, et al. Ixekizumab, an interleukin-17A specific monoclonal antibody, for the treatment of biologic-naive patients with active psoriatic arthritis: results from the 24-week randomised, double-blind, placebo-controlled and active (adalimumab)-controlled period of the phase III trial SPIRIT-P1. *Ann Rheum Dis*. 2017;76(1):79-87.
6. Mease PJ, Genovese MC, Greenwald MW, Ritchlin CT, Beaulieu AD, Deodhar A, et al. Brodalumab, an anti-IL17RA monoclonal antibody, in psoriatic arthritis. *N Engl J Med*. 2014;370(24):2295-2306.
7. Nakagawa H, Niino H, Ootaki K, Japanese brodalumab study g. Brodalumab, a human anti-interleukin-17-receptor antibody in the treatment of Japanese patients with moderate-to-severe plaque psoriasis: Efficacy and safety results from a phase II randomized controlled study. *J Dermatol Sci*. 2016;81(1):44-52.
8. Gottlieb AB, Langley RG, Philipp S, Sigurgeirsson B, Blauvelt A, Martin R, et al. Secukinumab Improves Physical Function in Subjects With Plaque Psoriasis and Psoriatic Arthritis: Results from Two Randomized, Phase 3 Trials. *J Drugs Dermatol*. 2015;14(8):821-833.
9. Nash P, Thaci D, Behrens F, Falk F, Kaltwasser JP. Leflunomide improves psoriasis in patients with psoriatic arthritis: an in-depth analysis of data from the TOPAS study. *Dermatology*. 2006;212(3):238-249.
10. Kaltwasser JP, Nash P, Gladman D, Rosen CF, Behrens F, Jones P, et al. Efficacy and safety of leflunomide in the treatment of psoriatic arthritis and psoriasis: a multinational, double-blind, randomized, placebo-controlled clinical trial. *Arthritis Rheum*. 2004;50(6):1939-1950.
11. Kavanaugh A, Mease PJ, Gomez-Reino JJ, Adebajo AO, Wollenhaupt J, Gladman DD, et al. Longterm (52-week) results of a phase III randomized, controlled trial of apremilast in patients with psoriatic arthritis. *J Rheumatol*. 2015;42(3):479-488.
12. Kavanaugh A, Mease PJ, Gomez-Reino JJ, Adebajo AO, Wollenhaupt J, Gladman DD, et al. Treatment of psoriatic arthritis in a phase 3 randomised, placebo-controlled trial with apremilast, an oral phosphodiesterase 4 inhibitor. *Ann Rheum Dis*. 2014;73(6):1020-1026.
13. Cutolo M, Myerson GE, Fleischmann RM, Liote F, Diaz-Gonzalez F, Van den Bosch F, et al. A Phase III, Randomized, Controlled Trial of Apremilast in Patients with Psoriatic Arthritis: Results of the PALACE 2 Trial. *J Rheumatol*. 2016;43(9):1724-1734.
14. Edwards CJ, Blanco FJ, Crowley J, Birbara CA, Jaworski J, Aelion J, et al. Apremilast, an oral phosphodiesterase 4 inhibitor, in patients with psoriatic arthritis and current skin involvement: a phase III, randomised, controlled trial (PALACE 3). *Ann Rheum Dis*. 2016;75(6):1065-1073.

15. Strand V, Schett G, Hu C, Stevens RM. Patient-reported Health-related Quality of Life with apremilast for psoriatic arthritis: a phase II, randomized, controlled study. *J Rheumatol.* 2013;40(7):1158-1165.
16. Schett G, Wollenhaupt J, Papp K, Joos R, Rodrigues JF, Vessey AR, et al. Oral apremilast in the treatment of active psoriatic arthritis: results of a multicenter, randomized, double-blind, placebo-controlled study. *Arthritis Rheum.* 2012;64(10):3156-3167.

**PICO 26. In adult patients with active PsA despite treatment with a TNFi monotherapy, what are the benefits and harms of switching to a second TNFi + MTX compared to adding MTX to the same TNFi monotherapy?**

Summary: The literature searches did not identify any studies that addressed this PICO question.

Quality of evidence across all critical outcomes: Very low

**PICO 26 (alternate). In adult patients with active PsA despite treatment with a TNFi monotherapy, what are the benefits and harms of switching to a second TNFi monotherapy compared to adding MTX to the same TNFi monotherapy?**

Summary: The literature searches did not identify any studies that addressed this PICO question.

Quality of evidence across all critical outcomes: Very low



**PICO 27. In adult patients with active PsA despite treatment with a TNFi monotherapy, what are the benefits and harms of switching to a second TNFi compared to switching to IL12/23i?**

Summary: This PICO question was addressed indirectly by three double-blind RCTs (4 publications). In addition to lack of direct drug comparisons, only 19% to 50% of patients in each study had prior TNFi exposure. One study (2 publications) involving PsA patients compared TNFi (certolizumab pegol [CZP]) to placebo.[1,2] Two studies involving PsA patients compared IL12/23i to placebo.[3,4] The outcomes measured when available were ACR20, PASI-75, HAQ-DI, serious infections and infections. All drugs showed statistically significant improvements in ACR20, PASI-75, and HAQ-DI over placebo; for serious infections there were no significant between-group differences, but with very high imprecision due to the low number of events (data not shown).

The adjusted indirect comparison method was used to calculate RRs for CZP vs. ustekinumab. For ACR20 we also performed this calculation using data only from patients with prior TNFi exposure (a few studies reported separate data for these patients). Ustekinumab showed a significant benefit over CZP for HAQ-DI and PASI-75, but not for ACR20 or rate of infection (see table below).

Quality of evidence across all critical outcomes: Low

| <b>TNFi compared to IL12/23i for patients with active PsA despite prior TNFi</b>                        |                     |                      |                      |                      |                         |                                    |                              |                  |                                  |                                     |                                                   |
|---------------------------------------------------------------------------------------------------------|---------------------|----------------------|----------------------|----------------------|-------------------------|------------------------------------|------------------------------|------------------|----------------------------------|-------------------------------------|---------------------------------------------------|
| <b>Bibliography: PICO 27: TNFi compared to IL12/23i for patients with active PsA despite prior TNFi</b> |                     |                      |                      |                      |                         |                                    |                              |                  |                                  |                                     |                                                   |
| <b>Quality assessment</b>                                                                               |                     |                      |                      |                      |                         |                                    | <b>Summary of findings</b>   |                  |                                  |                                     |                                                   |
| <b>Nº of participants (studies)<br/>Follow-up</b>                                                       | <b>Risk of bias</b> | <b>Inconsistency</b> | <b>Indirectness</b>  | <b>Imprecision</b>   | <b>Publication bias</b> | <b>Overall quality of evidence</b> | <b>Study event rates (%)</b> |                  | <b>Relative effect (95% CI)</b>  | <b>Anticipated absolute effects</b> |                                                   |
|                                                                                                         |                     |                      |                      |                      |                         |                                    | <b>With IL12/23i</b>         | <b>With TNFi</b> |                                  | <b>Risk with IL12/23i</b>           | <b>Risk difference with TNFi</b>                  |
| <b>ACR20, 12-24 weeks, Bucher adjusted indirect comparison</b>                                          |                     |                      |                      |                      |                         |                                    |                              |                  |                                  |                                     |                                                   |
| 732 (3 RCTs)                                                                                            | Not serious         | Not serious          | Serious <sup>a</sup> | Serious <sup>b</sup> | None                    | ⊕⊕○○<br>LOW                        | IL12/23i                     | CZP              | <b>RR 1.00</b><br>(0.62 to 1.60) | 433 per 1,000<br>(0.433)            | <b>0 more per 1000</b><br>(165 fewer to 260 more) |
| <b>ACR20, 12-24 weeks, Bucher adjusted indirect comparison, TNFi-exposed patients</b>                   |                     |                      |                      |                      |                         |                                    |                              |                  |                                  |                                     |                                                   |

## TNFi compared to IL12/23i for patients with active PsA despite prior TNFi

Bibliography: PICO 27: TNFi compared to IL12/23i for patients with active PsA despite prior TNFi

| Quality assessment                                                          |             |             |                      |                      |      |                  | Summary of findings |          |                                                                |                          |                                                              |
|-----------------------------------------------------------------------------|-------------|-------------|----------------------|----------------------|------|------------------|---------------------|----------|----------------------------------------------------------------|--------------------------|--------------------------------------------------------------|
| 260 (2 RCTs)                                                                | Not serious | Not serious | Serious <sup>a</sup> | Serious <sup>b</sup> | None | ⊕⊕○○<br>LOW      | CZP                 | IL12/23i | <b>RR 0.32</b><br>(0.01 to 2.52)                               | 296 per 1,000<br>(0.296) | <b>201 fewer per 1000</b><br>(293 fewer to 450 more)         |
| <b>HAQ-DI<sup>c</sup>, 12-24 weeks, Bucher adjusted indirect comparison</b> |             |             |                      |                      |      |                  |                     |          |                                                                |                          |                                                              |
| 725 (3 RCTs)                                                                | Not serious | Not serious | Serious <sup>a</sup> | Not serious          | None | ⊕⊕⊕○<br>MODERATE | IL12/23i            | CZP      | <b>RR 0.63</b><br>(0.41 to 0.97)<br><br><b>Favors IL12/23i</b> | 389 per 1,000<br>(0.389) | <b>144 fewer per 1000 (0.144)</b><br>(230 fewer to 12 fewer) |
| <b>PASI 75, 12-24 weeks, Bucher adjusted indirect comparison</b>            |             |             |                      |                      |      |                  |                     |          |                                                                |                          |                                                              |
| 535 (3 RCTs)                                                                | Not serious | Not serious | Serious <sup>a</sup> | Not serious          | None | ⊕⊕⊕○<br>MODERATE | IL12/23i            | CZP      | <b>RR 0.32</b><br>(0.13 to 0.83)<br><br><b>Favors IL12/23i</b> | 531 per 1,000<br>(0.531) | <b>361 fewer per 1000 (0.361)</b><br>(462 fewer to 90 fewer) |
| <b>Infection, 12-24 weeks, Bucher adjusted indirect comparison</b>          |             |             |                      |                      |      |                  |                     |          |                                                                |                          |                                                              |
| (3 RCTs)                                                                    | Not serious | Not serious | Serious <sup>a</sup> | Serious <sup>b</sup> | None | ⊕⊕○○<br>LOW      | IL12/23i            | CZP      | <b>RR 1.01</b><br>(0.61 to 1.67)                               | 271 per 1,000<br>(0.271) | <b>3 more per 1000 (0.003)</b><br>(106 fewer to 182 more)    |

**CI:** Confidence interval; **RR:** Risk ratio

- a. Indirect comparison, all studies compared drug to placebo, only 50-75% of patients had prior OSM exposure.
- b. Wide 95% CI
- c. HAQ-DI measured as proportion of patients who achieved minimum clinically important improvement (>0.3 or 0.35 in different studies).

Working Group quality of evidence categories:

**High quality: We are very confident that the true effect lies close to that of the estimate of the effect**

**Moderate quality: We are moderately confident in the effect estimate: The true effect is likely to be close to the estimate of the effect, but there is a possibility that it is substantially different**

**Low quality: Our confidence in the effect estimate is limited: The true effect may be substantially different from the estimate of the effect**

**Very low quality: We have very little confidence in the effect estimate: The true effect is likely to be substantially different from the estimate of effect**

## References:

1. Mease PJ, Fleischmann R, Deodhar AA, Wollenhaupt J, Khraishi M, Kielar D, et al. Effect of certolizumab pegol on signs and symptoms in patients with psoriatic arthritis: 24-week results of a Phase 3 double-blind randomised placebo-controlled study (RAPID-PsA). *Ann Rheum Dis.* 2014;73(1):48-55.
2. Gladman D, Fleischmann R, Coteur G, Woltering F, Mease PJ. Effect of certolizumab pegol on multiple facets of psoriatic arthritis as reported by patients: 24-week patient-reported outcome results of a phase III, multicenter study. *Arthritis Care Res (Hoboken).* 2014;66(7):1085-1092.
3. Ritchlin C, Rahman P, Kavanaugh A, McInnes IB, Puig L, Li S, et al. Efficacy and safety of the anti-IL-12/23 p40 monoclonal antibody, ustekinumab, in patients with active psoriatic arthritis despite conventional non-biological and biological anti-tumour necrosis factor therapy: 6-month and 1-year results of the phase 3, multicentre, double-blind, placebo-controlled, randomised PSUMMIT 2 trial. *Ann Rheum Dis.* 2014;73(6):990-999.
4. Gottlieb A, Menter A, Mendelsohn A, Shen YK, Li S, Guzzo C, et al. Ustekinumab, a human interleukin 12/23 monoclonal antibody, for psoriatic arthritis: randomised, double-blind, placebo-controlled, crossover trial. *Lancet.* 2009;373(9664):633-640.

**PICO 28. In adult patients with active PsA despite treatment with a TNFi monotherapy, what are the benefits and harms of switching to a second TNFi compared to switching to IL17i?**

**Summary:** This PICO was addressed indirectly by six double-blind RCTs (in 7 publications). In addition to lack of direct drug comparisons, only 28% to 50% of patients in each study had prior TNFi exposure. One study (in 2 publications) involving PsA patients compared TNFi (CZP) to placebo.[1,2] Two studies involving PsA patients compared Brodalumab to placebo.[3,4] Three studies compared Secukinumab to Placebo.[5-7] All drugs showed statistically significant improvements in ACR20, PASI-75, and HAQ-DI over placebo (data not shown).

The adjusted indirect comparison method was used to calculate RRs for CZP vs. IL17i (see table below). For ACR20 we also performed this calculation using data only from patients with prior TNFi exposure (a few studies reported separate data for these patients). The analyses found no significant differences in ACR20, HAQ-DI, PASI-75, or total infections, but almost all effect sizes were imprecise due to wide confidence intervals.

Quality of evidence across all critical outcomes: Low

| <b>TNFi compared to IL17i for patients with active PsA despite prior TNFi</b><br>Bibliography: PICO 28: TNFi compared to IL17i for patients with active PsA despite prior TNFi |              |               |                      |                      |                  |                             |                     |      |                                  |                              |                                                             |
|--------------------------------------------------------------------------------------------------------------------------------------------------------------------------------|--------------|---------------|----------------------|----------------------|------------------|-----------------------------|---------------------|------|----------------------------------|------------------------------|-------------------------------------------------------------|
| Quality assessment                                                                                                                                                             |              |               |                      |                      |                  |                             | Summary of findings |      |                                  |                              |                                                             |
| No of participants (studies)<br>Follow-up                                                                                                                                      | Risk of bias | Inconsistency | Indirectness         | Imprecision          | Publication bias | Overall quality of evidence |                     |      | Relative effect (95% CI)         | Anticipated absolute effects |                                                             |
|                                                                                                                                                                                |              |               |                      |                      |                  |                             | IL17i               | TNFi |                                  | Risk with IL17i              | Risk difference with TNFi                                   |
| <b>ACR20, 12-24 weeks, Bucher adjusted indirect comparison</b>                                                                                                                 |              |               |                      |                      |                  |                             |                     |      |                                  |                              |                                                             |
| 1022 (5 RCTs)                                                                                                                                                                  | Not serious  | Not serious   | Serious <sup>a</sup> | Serious <sup>b</sup> | None             | ⊕⊕○○<br>LOW                 | <b>IL17i</b>        | CZP  | <b>RR 0.85</b><br>(0.56 to 1.28) | 479 per 1,000<br>(0.479)     | <b>72 fewer per 1000 (0.072)</b><br>(211 fewer to 134 more) |

## TNFi compared to IL17i for patients with active PsA despite prior TNFi

Bibliography: PICO 28: TNFi compared to IL17i for patients with active PsA despite prior TNFi

| Quality assessment                                                                    |             |             |                      |                      |      | Summary of findings |              |       |                                  |                          |                                                                           |
|---------------------------------------------------------------------------------------|-------------|-------------|----------------------|----------------------|------|---------------------|--------------|-------|----------------------------------|--------------------------|---------------------------------------------------------------------------|
| <b>ACR20, 12-24 weeks, Bucher adjusted indirect comparison, TNFi-exposed patients</b> |             |             |                      |                      |      |                     |              |       |                                  |                          |                                                                           |
| 270 (3 RCTs)                                                                          | Not serious | Not serious | Serious <sup>a</sup> | Serious <sup>b</sup> | None | ⊕⊕○○<br>LOW         | <b>CZP</b>   | IL17i | <b>RR 0.33</b><br>(0.04 to 2.55) | 296 per 1,000<br>(0.296) | <b>198 fewer per 1000</b><br>(284 fewer to 459 more)                      |
| <b>HAQ-DI<sup>c</sup>, 12-24 weeks, Bucher adjusted indirect comparison</b>           |             |             |                      |                      |      |                     |              |       |                                  |                          |                                                                           |
| 910 (4 RCTs)                                                                          | Not serious | Not serious | Serious <sup>a</sup> | Not serious          | None | ⊕⊕⊕○<br>MODERATE    | <b>IL17i</b> | CZP   | <b>RR 1.05</b><br>(0.78 to 1.40) | 545 per 1,000<br>(0.545) | <b>27 more per 1000 (0.027)</b><br>(120 fewer to 218 more)                |
| <b>PASI 75, 12-24 weeks, Bucher adjusted indirect comparison</b>                      |             |             |                      |                      |      |                     |              |       |                                  |                          |                                                                           |
| 494 (3 RCTs)                                                                          | Not serious | Not serious | Serious <sup>a</sup> | Serious <sup>b</sup> | None | ⊕⊕○○<br>LOW         | <b>IL17i</b> | CZP   | <b>RR 0.70</b><br>(0.24 to 2.05) | 566 per 1,000<br>(0.566) | <b>140 fewer per 1000 (0.140)</b><br>(421 fewer to 197 more) <sup>d</sup> |
| <b>Infection, 12-24 weeks, Bucher adjusted indirect comparison</b>                    |             |             |                      |                      |      |                     |              |       |                                  |                          |                                                                           |

## TNFi compared to IL17i for patients with active PsA despite prior TNFi

Bibliography: PICO 28: TNFi compared to IL17i for patients with active PsA despite prior TNFi

| Quality assessment |             |             |                      |                      |      |             | Summary of findings |     |                                  |                          |                                                             |
|--------------------|-------------|-------------|----------------------|----------------------|------|-------------|---------------------|-----|----------------------------------|--------------------------|-------------------------------------------------------------|
| 876 (3 RCTs)       | Not serious | Not serious | Serious <sup>a</sup> | Serious <sup>b</sup> | None | ⊕⊕○○<br>LOW | <b>IL17i</b>        | CZP | <b>RR 0.94</b><br>(0.59 to 1.50) | 321 per 1,000<br>(0.321) | <b>19 fewer per 1000 (0.019)</b><br>(132 fewer to 161 more) |

**CI:** Confidence interval; **RR:** Risk ratio

- a. Indirect comparison, all studies compared drug to placebo, only 50-75% of patients had prior OSM exposure.
- b. Wide 95% CI
- c. HAQ-DI measured as proportion of patients who achieved minimum clinically important improvement (>0.3 or 0.35 in different studies).
- d. Absolute risk difference and confidence interval calculated based on the odds ratio.

Working Group quality of evidence categories:

**High quality:** We are very confident that the true effect lies close to that of the estimate of the effect

**Moderate quality:** We are moderately confident in the effect estimate: The true effect is likely to be close to the estimate of the effect, but there is a possibility that it is substantially different

**Low quality:** Our confidence in the effect estimate is limited: The true effect may be substantially different from the estimate of the effect

**Very low quality:** We have very little confidence in the effect estimate: The true effect is likely to be substantially different from the estimate of effect

### References:

1. Gladman D, Fleischmann R, Coteur G, Woltering F, Mease PJ. Effect of certolizumab pegol on multiple facets of psoriatic arthritis as reported by patients: 24-week patient-reported outcome results of a phase III, multicenter study. *Arthritis Care Res (Hoboken)*. 2014;66(7):1085-1092.
2. Mease PJ, Fleischmann R, Deodhar AA, Wollenhaupt J, Khraishi M, Kielar D, et al. Effect of certolizumab pegol on signs and symptoms in patients with psoriatic arthritis: 24-week results of a Phase 3 double-blind randomised placebo-controlled study (RAPID-PsA). *Ann Rheum Dis*. 2014;73(1):48-55.
3. Papp K, Menter A, Strober B, Kricorian G, Thompson EH, Milmont CE, et al. Efficacy and safety of brodalumab in subpopulations of patients with difficult-to-treat moderate-to-severe plaque psoriasis. *J Am Acad Dermatol*. 2015;72(3):436-439 e431.
4. Mease PJ, Genovese MC, Greenwald MW, Ritchlin CT, Beaulieu AD, Deodhar A, et al. Brodalumab, an anti-IL17RA monoclonal antibody, in psoriatic arthritis. *N Engl J Med*. 2014;370(24):2295-2306.

5. McInnes IB, Mease PJ, Kirkham B, Kavanaugh A, Ritchlin CT, Rahman P, et al. Secukinumab, a human anti-interleukin-17A monoclonal antibody, in patients with psoriatic arthritis (FUTURE 2): a randomised, double-blind, placebo-controlled, phase 3 trial. *Lancet*. 2015;386(9999):1137-1146.
6. McInnes IB, Sieper J, Braun J, Emery P, van der Heijde D, Isaacs JD, et al. Efficacy and safety of secukinumab, a fully human anti-interleukin-17A monoclonal antibody, in patients with moderate-to-severe psoriatic arthritis: a 24-week, randomised, double-blind, placebo-controlled, phase II proof-of-concept trial. *Ann Rheum Dis*. 2014;73(2):349-356.
7. Mease PJ, McInnes IB, Kirkham B, Kavanaugh A, Rahman P, van der Heijde D, et al. Secukinumab Inhibition of Interleukin-17A in Patients with Psoriatic Arthritis. *N Engl J Med*. 2015;373(14):1329-1339.

**PICO 29. In adult patients with active PsA despite treatment with a TNFi monotherapy, what are the benefits and harms of switching to an IL12/23i compared to switching to IL17i?**

Summary: This PICO was addressed indirectly by 8 double-blind RCTs involving PsA patients or psoriasis patients compared either IL12/23i or IL17i to placebo.[1-8] In addition to lack of direct drug comparisons, only one study[8] included 100% of patients with prior TNFi exposure; the remaining studies included only 28% to 50% of patients with prior TNFi exposure. All drugs showed statistically significant improvements in ACR20, PASI-75, and HAQ-DI over placebo, while adverse event rates did not differ significantly between the two groups (data not shown).

The adjusted indirect comparison method was used to calculate RRs for IL12/23i vs. IL17i (see table below). For ACR20 we also performed this calculation using data only from patients with prior TNFi exposure (a few studies reported separate data for these patients). No significant between-class difference was observed for the outcomes ACR20, HAQ-DI, PASI75, and total infections, but all of these findings were inconclusive due to imprecision in the effect estimates.

Quality of evidence across all critical outcomes: Low

| <b>IL12/23i compared to IL17i for patients with active PsA despite prior TNFi</b>                 |              |               |                      |                      |                  |                             |                     |       |                           |                              |                                                        |
|---------------------------------------------------------------------------------------------------|--------------|---------------|----------------------|----------------------|------------------|-----------------------------|---------------------|-------|---------------------------|------------------------------|--------------------------------------------------------|
| Bibliography: PICO 29: IL12/23i compared to IL17i for patients with active PsA despite prior TNFi |              |               |                      |                      |                  |                             |                     |       |                           |                              |                                                        |
| Quality assessment                                                                                |              |               |                      |                      |                  |                             | Summary of findings |       |                           |                              |                                                        |
| № of participants (studies)<br>Follow-up                                                          | Risk of bias | Inconsistency | Indirectness         | Imprecision          | Publication bias | Overall quality of evidence |                     |       | Relative effect (95% CI)  | Anticipated absolute effects |                                                        |
|                                                                                                   |              |               |                      |                      |                  |                             | IL12/23i            | IL17i |                           | Risk with IL12/23i           | Risk difference with IL17i                             |
| <b>ACR20, 12-24 weeks, Bucher adjusted indirect comparison</b>                                    |              |               |                      |                      |                  |                             |                     |       |                           |                              |                                                        |
| 662 (5 RCTs)                                                                                      | Not serious  | Not serious   | Serious <sup>a</sup> | Serious <sup>b</sup> | None             | ⊕⊕○○<br>LOW                 | IL12/23i            | IL17i | RR 1.19<br>(0.79 to 1.80) | 381 per 1,000<br>(0.381)     | <b>72 more per 1000 (0.072)</b> (80 fewer to 305 more) |
| <b>ACR20, 12-24 weeks, Bucher adjusted indirect comparison, TNFi-exposed patients</b>             |              |               |                      |                      |                  |                             |                     |       |                           |                              |                                                        |



## IL12/23i compared to IL17i for patients with active PsA despite prior TNFi

Bibliography: PICO 29: IL12/23i compared to IL17i for patients with active PsA despite prior TNFi

| Quality assessment                                                          |             |             |                      |                      |      |             | Summary of findings |       |                                  |                          |                                                              |
|-----------------------------------------------------------------------------|-------------|-------------|----------------------|----------------------|------|-------------|---------------------|-------|----------------------------------|--------------------------|--------------------------------------------------------------|
| 611 (4 RCTs)                                                                | Not serious | Not serious | Serious <sup>a</sup> | Serious <sup>b</sup> | None | ⊕⊕○○<br>LOW | IL12/23i            | IL17i | <b>RR 0.97</b><br>(0.47 to 2.00) | 356 per 1,000<br>(0.356) | <b>11 fewer per 1000 (0.011)</b><br>(189 fewer to 356 more)  |
| <b>HAQ-DI<sup>c</sup>, 12-24 weeks, Bucher adjusted indirect comparison</b> |             |             |                      |                      |      |             |                     |       |                                  |                          |                                                              |
| 1089 (5 RCTs)                                                               | Not serious | Not serious | Serious <sup>a</sup> | Serious <sup>b</sup> | None | ⊕⊕○○<br>LOW | IL12/23i            | IL17i | <b>RR 0.68</b><br>(0.44 to 1.07) | 389 per 1,000<br>(0.389) | <b>124 fewer per 1000 (0.124)</b><br>(218 fewer to 27 more)  |
| <b>PASI 75, 12-24 weeks, Bucher adjusted indirect comparison</b>            |             |             |                      |                      |      |             |                     |       |                                  |                          |                                                              |
| 639 (5 RCTs)                                                                | Not serious | Not serious | Serious <sup>a</sup> | Serious <sup>b</sup> | None | ⊕⊕○○<br>LOW | IL12/23i            | IL17i | <b>RR 0.52</b><br>(0.22 to 1.22) | 493 per 1,000<br>(0.493) | <b>237 fewer per 1000 (0.237)</b><br>(385 fewer to 108 more) |
| <b>Infection, 12-24 weeks, Bucher adjusted indirect comparison</b>          |             |             |                      |                      |      |             |                     |       |                                  |                          |                                                              |
| 913 (3 RCTs)                                                                | Not serious | Not serious | Serious <sup>a</sup> | Serious <sup>b</sup> | None | ⊕⊕○○<br>LOW | IL12/23i            | IL17i | <b>RR 1.07</b><br>(0.62 to 1.85) | 271 per 1,000<br>(0.271) | <b>19 more per 1000 (0.019)</b><br>(103 fewer to 230 more)   |

CI: Confidence interval; RR: Risk ratio

- a. Indirect comparison, all studies compared drug to placebo, in some studies the majority of patients did not have prior TNFi exposure and data was not reported separately for those with TNFi exposure.
- b. Wide 95% CI
- c. HAQ-DI measured as proportion of patients who achieved minimum clinically important improvement (>0.3 or 0.35 in different studies).

Working Group quality of evidence categories:

**High quality: We are very confident that the true effect lies close to that of the estimate of the effect**

**Moderate quality: We are moderately confident in the effect estimate: The true effect is likely to be close to the estimate of the effect, but there is a possibility that it is substantially different**

**Low quality: Our confidence in the effect estimate is limited: The true effect may be substantially different from the estimate of the effect**

**Very low quality: We have very little confidence in the effect estimate: The true effect is likely to be substantially different from the estimate of effect**

## References:

1. Gottlieb A, Menter A, Mendelsohn A, Shen YK, Li S, Guzzo C, et al. Ustekinumab, a human interleukin 12/23 monoclonal antibody, for psoriatic arthritis: randomised, double-blind, placebo-controlled, crossover trial. *Lancet*. 2009;373(9664):633-640.
2. McInnes IB, Mease PJ, Kirkham B, Kavanaugh A, Ritchlin CT, Rahman P, et al. Secukinumab, a human anti-interleukin-17A monoclonal antibody, in patients with psoriatic arthritis (FUTURE 2): a randomised, double-blind, placebo-controlled, phase 3 trial. *Lancet*. 2015;386(9999):1137-1146.
3. Mease PJ, McInnes IB, Kirkham B, Kavanaugh A, Rahman P, van der Heijde D, et al. Secukinumab Inhibition of Interleukin-17A in Patients with Psoriatic Arthritis. *N Engl J Med*. 2015;373(14):1329-1339.
4. Mease PJ, Genovese MC, Greenwald MW, Ritchlin CT, Beaulieu AD, Deodhar A, et al. Brodalumab, an anti-IL17RA monoclonal antibody, in psoriatic arthritis. *N Engl J Med*. 2014;370(24):2295-2306.
5. Papp K, Menter A, Strober B, Kricorian G, Thompson EH, Milmont CE, et al. Efficacy and safety of brodalumab in subpopulations of patients with difficult-to-treat moderate-to-severe plaque psoriasis. *J Am Acad Dermatol*. 2015;72(3):436-439 e431.
6. Ritchlin C, Rahman P, Kavanaugh A, McInnes IB, Puig L, Li S, et al. Efficacy and safety of the anti-IL-12/23 p40 monoclonal antibody, ustekinumab, in patients with active psoriatic arthritis despite conventional non-biological and biological anti-tumour necrosis factor therapy: 6-month and 1-year results of the phase 3, multicentre, double-blind, placebo-controlled, randomised PSUMMIT 2 trial. *Ann Rheum Dis*. 2014;73(6):990-999.
7. McInnes IB, Sieper J, Braun J, Emery P, van der Heijde D, Isaacs JD, et al. Efficacy and safety of secukinumab, a fully human anti-interleukin-17A monoclonal antibody, in patients with moderate-to-severe psoriatic arthritis: a 24-week, randomised, double-blind, placebo-controlled, phase II proof-of-concept trial. *Ann Rheum Dis*. 2014;73(2):349-356.
8. Nash P, Kirkham B, Okada M, Rahman P, Combe B, Burmester G, Adams DH, Kerr L, Lee C, Shuler CL, Genovese M on behalf of the SPIRIT-P2 Study Group. Ixekizumab for the treatment of patients with active psoriatic arthritis and an inadequate response to tumour necrosis factor inhibitors: results from the 24-week randomised, double-blind, placebo-controlled period of the SPIRIT-P2 phase 3 trial. *Lancet* 2017; 389:2317-2327.



**PICO 30. In adult patients with active PsA despite treatment with a TNFi monotherapy, what are the benefits and harms of switching to a second TNFi and MTX combination therapy compared to a second TNFi monotherapy?**

Summary: The literature searches did not identify any studies that addressed this PICO question.

Quality of evidence across all critical outcomes: Very low

**PICO 31. In adult patients with active PsA despite treatment with a TNFi monotherapy, what are the benefits and harms of switching to MTX and IL12/23i combination therapy compared to switching to IL12/23i monotherapy?**

Summary: The literature searches did not identify any studies that addressed this PICO question.

Quality of evidence across all critical outcomes: Very low

**PICO 32. In adult patients with active PsA despite treatment with a TNFi monotherapy, what are the benefits and harms of switching to MTX and IL17i combination therapy compared to switching to IL17i monotherapy?**

Summary: The literature searches did not identify any studies that addressed this PICO question.

Quality of evidence across all critical outcomes: Very low

**PICO 33. In adult patients with active PsA despite treatment with a TNFi and MTX combination therapy,, what are the benefits and harms of switching to a second TNFi and MTX combination therapy compared to switching to a second TNFi monotherapy?**

Summary: The literature searches did not identify any studies that addressed this PICO question.

Quality of evidence across all critical outcomes: Very low

**PICO 34. In adult patients with active PsA despite treatment with a TNFi and MTX combination therapy,, what are the benefits and harms of switching to MTX and IL12/23i combination therapy compared to switching to IL12/23i monotherapy?**

Summary: The literature searches did not identify any studies that addressed this PICO question.

Quality of evidence across all critical outcomes: Very low

**PICO 35. In adult patients with active PsA despite treatment with a TNFi and MTX combination therapy, what are the benefits and harms of switching to MTX and IL17i combination therapy compared to switching to IL17i monotherapy?**

Summary: The literature searches did not identify any studies that addressed this PICO question.

Quality of evidence across all critical outcomes: Very low

**PICO 36. In adult patients with active PsA despite treatment with an IL23/23i, what are the benefits and harms of adding MTX to the IL12/23i compared to switching to TNFi?**

Summary: The literature searches did not identify any studies that addressed this PICO question.

Quality of evidence across all critical outcomes: Very low

**PICO 37. In adult patients with active PsA despite treatment with an IL23/23i, what are the benefits and harms of adding MTX to the IL12/23i compared to switching to IL17i?**

Summary: The literature searches did not identify any studies that addressed this PICO question.

Quality of evidence across all critical outcomes: Very low

**PICO 38. In adult patients with active PsA despite treatment with an IL23/23i, what are the benefits and harms of switching to a TNFi compared to switching to IL17i?**

Summary: The literature searches did not identify any studies that addressed this PICO question.

Quality of evidence across all critical outcomes: Very low

**PICO 39. In adult patients with active PsA despite treatment with an IL17i, what are the benefits and harms of switching to a TNFi compared to switching to IL12/23i?**

Summary: The literature searches did not identify any studies that addressed this PICO question.

Quality of evidence across all critical outcomes: Very low

**PICO 40. In adult patients with active PsA despite treatment with an IL17i, what are the benefits and harms of adding MTX to the IL17i compared to switching to IL12/23i?**

Summary: The literature searches did not identify any studies that addressed this PICO question.

Quality of evidence across all critical outcomes: Very low

**PICO 41. In adult patients with active PsA despite treatment with an IL17i, what are the benefits and harms of adding MTX to the IL17i compared to switching to TNFi?**

Summary: The literature searches did not identify any studies that addressed this PICO question.

Quality of evidence across all critical outcomes: Very low

**PICO 42. In adult patients with active PsA despite treatment with an IL17i, what are the benefits and harms of switching to a different IL17i compared to switching to TNFi?**

Summary: The literature searches did not identify any studies that addressed this PICO question.

Quality of evidence across all critical outcomes: Very low

**PICO 43. In adult patients with active PsA despite treatment with an IL17i, what are the benefits and harms of switching to a different IL17i compared to switching to IL12/23i?**

Summary: The literature searches did not identify any studies that addressed this PICO question.

Quality of evidence across all critical outcomes: Very low

**PICO 44. Among adults with active PsA, what are the benefits and harms of treat to target (or intensive therapy) compared to a not treat to target strategy (include liver toxicity, zoster, malignancy, infection, cardiovascular, IBD, uveitis)?**

**Summary:** This PICO was directly addressed by one open label, multicenter RCT that compared tight control to standard therapy.[1] Methotrexate was the initial therapy for the tight control arm and followed by a specific treatment algorithm. Patients who did not achieve minimal disease activity (MDA) following 12 weeks of MTX (starting at 15 mg/week and ending at 25 mg/week) received combination therapy (MTX + sulfasalazine) for 8 weeks. Patients who still did not achieve MDA then received either combination treatment (MTX + cyclosporine or MTX + leflunomide) for 12 weeks if they had <3 swollen joints or first-line anti-TNFi therapy (usually etanercept unless contraindicated) for 12 weeks if they had ≥3 swollen joints. Patients who still did not achieve MDA and had ≥3 swollen joints then received second-line anti TNFi therapy for 12 weeks. Patients were seen every 4 weeks. At 48 weeks follow-up, statistically significant differences favoring tight control over standard therapy were reported for disease activity (measured by ACR 20 response) and skin (measured by PASI-75) in the evaluable patient population. Abdominal/GI discomfort occurred significantly more often in the MTX tight control group. Nausea was also more frequent in this group but the difference did not reach statistical significance. Liver enzyme abnormalities did not differ significantly between groups, but the effect size was imprecise due to a wide CI.

Quality of evidence across all critical outcomes: Low

| <b>Tight control compared to standard care for Adults with Active PsA</b><br>Bibliography: PICO 44: Tight Control versus Standard Care for Adults with Active PsA. |              |               |              |             |                  |                             |                       |                        |                          |                              |                                        |
|--------------------------------------------------------------------------------------------------------------------------------------------------------------------|--------------|---------------|--------------|-------------|------------------|-----------------------------|-----------------------|------------------------|--------------------------|------------------------------|----------------------------------------|
| Quality assessment                                                                                                                                                 |              |               |              |             |                  |                             | Summary of findings   |                        |                          |                              |                                        |
| No of participants (studies)<br>Follow-up                                                                                                                          | Risk of bias | Inconsistency | Indirectness | Imprecision | Publication bias | Overall quality of evidence | Study event rates (%) |                        | Relative effect (95% CI) | Anticipated absolute effects |                                        |
|                                                                                                                                                                    |              |               |              |             |                  |                             | With standard care    | With MTX tight control |                          | Risk with standard care      | Risk difference with MTX tight control |
| <b>ACR20, 48 weeks</b>                                                                                                                                             |              |               |              |             |                  |                             |                       |                        |                          |                              |                                        |



## Tight control compared to standard care for Adults with Active PSA

Bibliography: PICO 44: Tight Control versus Standard Care for Adults with Active PSA.

| Quality assessment                            |                      |             |             |                      |      |                  | Summary of findings |                   |                                                                     |                          |                                                              |
|-----------------------------------------------|----------------------|-------------|-------------|----------------------|------|------------------|---------------------|-------------------|---------------------------------------------------------------------|--------------------------|--------------------------------------------------------------|
| 173<br>(1 RCT)                                | serious <sup>a</sup> | not serious | not serious | not serious          | none | ⊕⊕⊕○<br>MODERATE | 37/84<br>(44.0%)    | 55/89<br>(61.8%)  | <b>RR 1.40</b><br>(1.05 to 1.88)<br><br><b>Favors tight control</b> | 440 per 1,000<br>(0.440) | <b>176 more per 1,000 (0.176)</b><br>(22 more to 388 more)   |
| <b>PASI 75, 48 weeks</b>                      |                      |             |             |                      |      |                  |                     |                   |                                                                     |                          |                                                              |
| 156<br>(1 RCT)                                | serious <sup>a</sup> | not serious | not serious | not serious          | none | ⊕⊕⊕○<br>MODERATE | 27/81<br>(33.3%)    | 44/75<br>(58.7%)  | <b>RR 1.76</b><br>(1.23 to 2.53)<br><br><b>Favors tight control</b> | 333 per 1,000<br>(0.333) | <b>253 more per 1,000 (0.253)</b><br>(77 more to 510 more)   |
| <b>Liver enzyme abnormalities<sup>c</sup></b> |                      |             |             |                      |      |                  |                     |                   |                                                                     |                          |                                                              |
| 206<br>(1 RCT)                                | serious <sup>a</sup> | not serious | not serious | serious <sup>b</sup> | none | ⊕⊕○○<br>LOW      | 28/105<br>(26.7%)   | 23/101<br>(22.8%) | <b>RR 0.85</b><br>(0.53 to 1.38)                                    | 267 per 1,000<br>(0.267) | <b>40 fewer per 1,000 (0.040)</b><br>(125 fewer to 101 more) |
| <b>Abdominal/GI upset<sup>d</sup></b>         |                      |             |             |                      |      |                  |                     |                   |                                                                     |                          |                                                              |

## Tight control compared to standard care for Adults with Active PSA

Bibliography: PICO 44: Tight Control versus Standard Care for Adults with Active PSA.

| Quality assessment |                      |             |             |                      |      |                  | Summary of findings |                   |                                                                     |                          |                                                             |
|--------------------|----------------------|-------------|-------------|----------------------|------|------------------|---------------------|-------------------|---------------------------------------------------------------------|--------------------------|-------------------------------------------------------------|
| 206<br>(1 study)   | serious <sup>a</sup> | not serious | not serious | not serious          | none | ⊕⊕⊕○<br>MODERATE | 12/105<br>(11.4%)   | 31/101<br>(30.7%) | <b>RR 2.69</b><br>(1.46 to 4.93)<br><br><b>Favors standard care</b> | 114 per 1,000<br>(0.114) | <b>193 more per 1,000 (0.193)</b><br>(53 more to 449 more)  |
| <b>Nausea</b>      |                      |             |             |                      |      |                  |                     |                   |                                                                     |                          |                                                             |
| 206<br>(1 RCT)     | serious <sup>a</sup> | not serious | not serious | serious <sup>b</sup> | none | ⊕⊕○○<br>LOW      | 27/105<br>(25.7%)   | 36/101<br>(35.6%) | <b>RR 1.39</b><br>(0.91 to 2.10)                                    | 257 per 1,000<br>(0.257) | <b>100 more per 1,000 (0.100)</b><br>(23 fewer to 283 more) |

**CI:** Confidence interval; **RR:** Risk ratio

- a. No blinding of patients/physicians. No patient data provided for primary outcome (ITT population); only OR presented in narrative. Recall bias for AEs described by authors as a limitation.
- b. Wide CI that overlaps with line of no effect.
- c. Cutoff for abnormal enzyme level was not defined in the study
- d. Not defined in the study

Note: TICOPA trial. Additional limitations noted by authors included inability to test the efficacy of masked assessors; "blunting of the efficacy of tight control" since standard arm being treated by consultant rheumatologists at teaching hospitals and may already be following a more aggressive approach to treatment; possible dilution of intended treatment effect due to "deviations from the treatment escalation protocol."

Working Group quality of evidence categories:

**High quality: We are very confident that the true effect lies close to that of the estimate of the effect**

**Moderate quality: We are moderately confident in the effect estimate: The true effect is likely to be close to the estimate of the effect, but there is a possibility that it is substantially different**

**Low quality: Our confidence in the effect estimate is limited: The true effect may be substantially different from the estimate of the effect**

**Very low quality: We have very little confidence in the effect estimate: The true effect is likely to be substantially different from the estimate of effect**

**References:**

1. Coates LC, Moverley AR, McParland L, Brown S, Navarro-Coy N, O'Dwyer JL, et al. Effect of tight control of inflammation in early psoriatic arthritis (TICOPA): a UK multicentre, open-label, randomised controlled trial. *Lancet*. 2015;386(10012):2489-2498.

**PICO 45. In adult patients with active axial PsA despite treatment with NSAIDs, what are the benefits and harms of switching to IL12/23i compared to switching to TNFi?**

Summary: The literature searches did not identify any studies that addressed this PICO question.

Quality of evidence across all critical outcomes: Very low

**PICO 46. In adult patients with active axial PsA despite treatment with NSAIDs, what are the benefits and harms of switching to IL17i compared to switching to TNFi?**

Summary: The literature searches did not identify any studies that addressed this PICO question.

Quality of evidence across all critical outcomes: Very low

**PICO 47. In adult patients with active axial PsA despite treatment with NSAIDs, what are the benefits and harms of switching to IL17i compared to switching to IL12/23i?**

Summary: The literature searches did not identify any studies that addressed this PICO question.

Quality of evidence across all critical outcomes: Very low

**PICO 48. In adult patients with active PsA and predominant enthesitis who are both OSM and biologic treatment-naïve, what are the benefits and harms of starting OSM compared to starting NSAIDs?**

**Summary:** This PICO was addressed indirectly by three double-blind RCTs comparing OSM to Placebo, all using apremilast.[1-3] No studies included a treatment arm of patients starting NSAIDs. The relevant outcomes measured included enthesitis, serious infection, liver toxicity, nausea and diarrhea. Because all trials had a placebo comparison and all (or almost all) patients had prior treatment with OSM and/or biologics, the indirectness of the evidence is very serious.

Only one of the apremilast studies [3] provided sufficient information to import into Table 1. The other [2] reported a non-significant trend toward greater improvement in MASES score in patients receiving apremilast compared with placebo; the magnitude of difference was smaller in this study. The apremilast groups had higher liver toxicity (non-significant difference with imprecision in the CI), but a statistically significant increase in GI intolerance compared to placebo.

Quality of evidence across all critical outcomes: Very low

| <b>Table 1. OSM or NSAIDs compared to placebo in patients with enthesitis who are treatment-naïve</b>                                        |                     |                      |                           |                    |                         |                                    |                              |                 |                                 |                                                          |                                                                     |
|----------------------------------------------------------------------------------------------------------------------------------------------|---------------------|----------------------|---------------------------|--------------------|-------------------------|------------------------------------|------------------------------|-----------------|---------------------------------|----------------------------------------------------------|---------------------------------------------------------------------|
| <b>Bibliography: PICO 48: In patients with PsA and enthesitis who are treatment-naïve, benefit/harm of starting OSM vs. starting NSAIDs.</b> |                     |                      |                           |                    |                         |                                    |                              |                 |                                 |                                                          |                                                                     |
| <b>Quality assessment</b>                                                                                                                    |                     |                      |                           |                    |                         |                                    | <b>Summary of findings</b>   |                 |                                 |                                                          |                                                                     |
| <b>№ of participants (studies) Follow-up</b>                                                                                                 | <b>Risk of bias</b> | <b>Inconsistency</b> | <b>Indirectness</b>       | <b>Imprecision</b> | <b>Publication bias</b> | <b>Overall quality of evidence</b> | <b>Study event rates (%)</b> |                 | <b>Relative effect (95% CI)</b> | <b>Anticipated absolute effects</b>                      |                                                                     |
|                                                                                                                                              |                     |                      |                           |                    |                         |                                    | <b>With placebo</b>          | <b>With OSM</b> |                                 | <b>Risk with placebo</b>                                 | <b>Risk difference with OSM</b>                                     |
| <b>Enthesitis score (MASES) (LS mean change) – Apremilast vs. placebo</b>                                                                    |                     |                      |                           |                    |                         |                                    |                              |                 |                                 |                                                          |                                                                     |
| 326 (1 RCT)                                                                                                                                  | not serious         | serious <sup>a</sup> | very serious <sup>b</sup> | not serious        | none                    | ⊕○○○<br>VERY LOW                   | 165                          | 161             | -                               | The mean enthesitis score (MASES) (LS mean change) was 0 | MD 0.9 lower (1.73 lower to 0.07 lower)<br><b>Favors apremilast</b> |

**Table 1. OSM or NSAIDs compared to placebo in patients with enthesitis who are treatment-naive**

**Bibliography: PICO 48: In patients with PsA and enthesitis who are treatment-naive, benefit/harm of starting OSM vs. starting NSAIDs.**

| Quality assessment                                                   |             |             |                           |                      |      | Summary of findings |                  |                    |                                                             |                         |                                                             |
|----------------------------------------------------------------------|-------------|-------------|---------------------------|----------------------|------|---------------------|------------------|--------------------|-------------------------------------------------------------|-------------------------|-------------------------------------------------------------|
| <b>Nausea – TNFi vs. placebo</b>                                     |             |             |                           |                      |      |                     |                  |                    |                                                             |                         |                                                             |
| 259<br>(1 RCT)                                                       | not serious | not serious | very serious <sup>b</sup> | serious <sup>c</sup> | none | ⊕○○○<br>VERY LOW    | 5/113<br>(4.4%)  | 4/146<br>(2.7%)    | <b>RR 0.62</b><br>(0.17 to 2.25)                            | 44 per 1,000<br>(0.044) | <b>17 fewer per 1,000 (0.017)</b><br>(37 fewer to 55 more)  |
| <b>GI intolerance (diarrhea and nausea) – Apremilast vs. placebo</b> |             |             |                           |                      |      |                     |                  |                    |                                                             |                         |                                                             |
| 983<br>(3 RCTs)                                                      | not serious | not serious | very serious <sup>b</sup> | not serious          | none | ⊕⊕○○<br>LOW         | 38/486<br>(7.8%) | 162/497<br>(32.6%) | <b>RR 4.17</b><br>(3.00 to 5.80)<br><b>Favors placebo</b>   | 78 per 1,000<br>(0.078) | <b>248 more per 1,000 (0.248)</b><br>(156 more to 375 more) |
| <b>Liver toxicity<sup>d</sup> – Apremilast vs. placebo</b>           |             |             |                           |                      |      |                     |                  |                    |                                                             |                         |                                                             |
| 984<br>(3 RCTs)                                                      | not serious | not serious | very serious <sup>b</sup> | not serious          | none | ⊕⊕○○<br>LOW         | 1/492<br>(0.2%)  | 6/492<br>(1.2%)    | <b>RD 0.01</b><br>(-0.001 to 0.02)<br><b>Favors placebo</b> | 2 per 1,000<br>(0.002)  | <b>10 more per 1,000 (0.005)</b><br>(1 fewer to 20 more)    |

**CI:** Confidence interval; **RD:** Risk difference **RR:** Risk ratio

a. A second study, by Edwards et al 2016, reported a smaller improvement in enthesitis score but could not be added to RevMan. See discussion in summary paragraph.

b. Indirect comparison to placebo and all or almost all patients had prior exposure to OSMs or biologics.

c. Wide CI crossing significant effect and no-effect lines

d. Studies had slightly different cutoffs for abnormality: ALT > 150 u/l (2 studies), ALT > upper normal limit (1 study)

Working Group quality of evidence categories:

**High quality: We are very confident that the true effect lies close to that of the estimate of the effect**

**Moderate quality: We are moderately confident in the effect estimate: The true effect is likely to be close to the estimate of the effect, but there is a possibility that it is substantially different**

**Low quality: Our confidence in the effect estimate is limited: The true effect may be substantially different from the estimate of the effect**

**Very low quality: We have very little confidence in the effect estimate: The true effect is likely to be substantially different from the estimate of effect**

### References:

1. Cutolo M, Myerson GE, Fleischmann RM, Liote F, Diaz-Gonzalez F, Van den Bosch F, et al. A Phase III, Randomized, Controlled Trial of Apremilast in Patients with Psoriatic Arthritis: Results of the PALACE 2 Trial. *J Rheumatol.* 2016;43(9):1724-1734.
2. Edwards CJ, Blanco FJ, Crowley J, Birbara CA, Jaworski J, Aelion J, et al. Apremilast, an oral phosphodiesterase 4 inhibitor, in patients with psoriatic arthritis and current skin involvement: a phase III, randomised, controlled trial (PALACE 3). *Ann Rheum Dis.* 2016;75(6):1065-1073.
3. Kavanaugh A, Mease PJ, Gomez-Reino JJ, Adebajo AO, Wollenhaupt J, Gladman DD, et al. Longterm (52-week) results of a phase III randomized, controlled trial of apremilast in patients with psoriatic arthritis. *J Rheumatol.* 2015;42(3):479-488.

**PICO 49. In adult patients with active PsA and predominant enthesitis despite treatment with OSM, what are the benefits and harms of switching to TNFi compared to switching to OSM?**

**Summary:** This PICO was addressed indirectly by five double-blind RCTs (6 publications). Two studies (in three publications) involving PsA patients compared TNFi (golimumab and certolizumab pegol) to placebo.[1-3] Three studies compared OSM to Placebo, all using apremilast.[4-6] The relevant outcomes measured included enthesitis, serious infection, liver toxicity, nausea and diarrhea.

Enthesitis and adverse events could not be compared using adjusted indirect comparisons, so these findings are presented for drug versus placebo in Table 1. Only one of the apremilast studies [6] provided sufficient information to import into the comparison tables. The other [5] reported a non-significant trend toward greater improvement in MASES score in patients receiving apremilast compared with placebo; the magnitude of difference was smaller in this study. TNFis were superior to placebo in improving enthesitis. There was no significant difference between TNFi and placebo in serious infections, nausea and diarrhea, but all findings were imprecise. The apremilast groups had higher liver toxicity (non-significant difference with imprecision in the CI), but a statistically significant increase in GI intolerance.

Quality of evidence across all critical outcomes: Low

| <b>Table 1. TNFi or OSM compared to placebo in patients with enthesitis despite OSM</b><br>Bibliography: PICO 49: In patients with PsA and enthesitis despite OSM, benefit/harm of switching to TNFi compared to OSM. |              |               |              |             |                  |                             |                       |                  |                          |                              |                                  |
|-----------------------------------------------------------------------------------------------------------------------------------------------------------------------------------------------------------------------|--------------|---------------|--------------|-------------|------------------|-----------------------------|-----------------------|------------------|--------------------------|------------------------------|----------------------------------|
| Quality assessment                                                                                                                                                                                                    |              |               |              |             |                  |                             | Summary of findings   |                  |                          |                              |                                  |
| No of participants (studies)<br>Follow-up                                                                                                                                                                             | Risk of bias | Inconsistency | Indirectness | Imprecision | Publication bias | Overall quality of evidence | Study event rates (%) |                  | Relative effect (95% CI) | Anticipated absolute effects |                                  |
|                                                                                                                                                                                                                       |              |               |              |             |                  |                             | With placebo          | With TNFi or OSM |                          | Risk with placebo            | Risk difference with TNFi or OSM |
| <b>Enthesitis score (MASES) (LS mean change) – Apremilast vs. placebo</b>                                                                                                                                             |              |               |              |             |                  |                             |                       |                  |                          |                              |                                  |

**Table 1. TNFi or OSM compared to placebo in patients with enthesitis despite OSM**  
**Bibliography: PICO 49: In patients with PsA and enthesitis despite OSM, benefit/harm of switching to TNFi compared to OSM.**

| Quality assessment                                  |             |                      |                      |             |      |                  | Summary of findings |                   |                                                       |                                                                 |                                                                               |
|-----------------------------------------------------|-------------|----------------------|----------------------|-------------|------|------------------|---------------------|-------------------|-------------------------------------------------------|-----------------------------------------------------------------|-------------------------------------------------------------------------------|
| 326<br>(1 RCT)                                      | not serious | serious <sup>a</sup> | serious <sup>b</sup> | Not serious | none | ⊕⊕○○<br>LOW      | 165                 | 161               | -                                                     | The mean enthesitis score (MASES) (LS mean change) was <b>0</b> | <b>MD 0.9 lower</b><br>(1.73 lower to 0.07 lower)<br><b>Favors apremilast</b> |
| <b>Enthesitis, 14 weeks – Golimumab vs. placebo</b> |             |                      |                      |             |      |                  |                     |                   |                                                       |                                                                 |                                                                               |
| 247<br>(1 RCT)                                      | not serious | not serious          | serious <sup>b</sup> | not serious | none | ⊕⊕⊕○<br>MODERATE | 75/105<br>(71.4%)   | 78/142<br>(54.9%) | <b>RR 0.77</b><br>(0.63 to 0.93)<br><b>Favors GOL</b> | 714 per 1,000<br>(0.714)                                        | <b>164 fewer per 1,000 (0.164)</b><br>(264 fewer to 50 fewer)                 |
| <b>Serious infection – TNFi vs. placebo</b>         |             |                      |                      |             |      |                  |                     |                   |                                                       |                                                                 |                                                                               |
| 533<br>(2 RCTs)                                     | not serious | not serious          | serious <sup>b</sup> | not serious | none | ⊕⊕⊕○<br>MODERATE | 5/249<br>(2.0%)     | 3/284<br>(1.1%)   | <b>RD -0.009</b><br>(-0.02 to 0.02)                   | 20 per 1,000<br>(0.020)                                         | <b>9 fewer per 1,000 (0.009)</b><br>(20 fewer to 20 more)                     |
| <b>Diarrhea – TNFi vs. placebo</b>                  |             |                      |                      |             |      |                  |                     |                   |                                                       |                                                                 |                                                                               |



**Table 1. TNFi or OSM compared to placebo in patients with enthesitis despite OSM**  
 Bibliography: PICO 49: In patients with PsA and enthesitis despite OSM, benefit/harm of switching to TNFi compared to OSM.

| Quality assessment                                                   |             |             |                      |                      |      |                  | Summary of findings |                    |                                                                 |                         |                                                             |
|----------------------------------------------------------------------|-------------|-------------|----------------------|----------------------|------|------------------|---------------------|--------------------|-----------------------------------------------------------------|-------------------------|-------------------------------------------------------------|
| 259<br>(1 RCT)                                                       | not serious | not serious | serious <sup>b</sup> | serious <sup>c</sup> | none | ⊕⊕○○<br>LOW      | 4/113<br>(3.5%)     | 5/146<br>(3.4%)    | <b>RR 0.97</b><br>(0.27 to 3.52)                                | 35 per 1,000<br>(0.035) | <b>1 fewer per 1,000 (0.001)</b><br>(26 fewer to 89 more)   |
| <b>Nausea – TNFi vs. placebo</b>                                     |             |             |                      |                      |      |                  |                     |                    |                                                                 |                         |                                                             |
| 259<br>(1 RCT)                                                       | not serious | not serious | serious <sup>b</sup> | serious <sup>c</sup> | none | ⊕⊕○○<br>LOW      | 5/113<br>(4.4%)     | 4/146<br>(2.7%)    | <b>RR 0.62</b><br>(0.17 to 2.25)                                | 44 per 1,000<br>(0.044) | <b>17 fewer per 1,000 (0.017)</b><br>(37 fewer to 55 more)  |
| <b>GI intolerance (diarrhea and nausea) – Apremilast vs. placebo</b> |             |             |                      |                      |      |                  |                     |                    |                                                                 |                         |                                                             |
| 983<br>(3 RCTs)                                                      | not serious | not serious | serious <sup>b</sup> | not serious          | none | ⊕⊕⊕○<br>MODERATE | 38/486<br>(7.8%)    | 162/497<br>(32.6%) | <b>RR 4.17</b><br>(3.00 to 5.80)<br><br><b>Favors placebo</b>   | 78 per 1,000<br>(0.078) | <b>248 more per 1,000 (0.248)</b><br>(156 more to 375 more) |
| <b>Liver toxicity<sup>d</sup> – Apremilast vs. placebo</b>           |             |             |                      |                      |      |                  |                     |                    |                                                                 |                         |                                                             |
| 984<br>(3 RCTs)                                                      | not serious | not serious | serious <sup>b</sup> | not serious          | none | ⊕⊕⊕○<br>MODERATE | 1/492<br>(0.2%)     | 6/492<br>(1.2%)    | <b>RD 0.01</b><br>(-0.001 to 0.02)<br><br><b>Favors placebo</b> | 2 per 1,000<br>(0.002)  | <b>10 more per 1,000 (0.005)</b><br>(1 fewer to 20 more)    |

CI: Confidence interval; RD: Risk difference RR: Risk ratio

- a. A second study, by Edwards et al 2016, reported a smaller improvement in enthesitis score but could not be added to RevMan. See discussion in summary paragraph.
- b. Indirect comparison to placebo
- c. Wide CI crossing significant effect and no-effect lines
- d. Studies had slightly different cutoffs for abnormality: ALT > 150 u/l (2 studies), ALT > upper normal limit (1 study)

Working Group quality of evidence categories:

**High quality: We are very confident that the true effect lies close to that of the estimate of the effect**

**Moderate quality: We are moderately confident in the effect estimate: The true effect is likely to be close to the estimate of the effect, but there is a possibility that it is substantially different**

**Low quality: Our confidence in the effect estimate is limited: The true effect may be substantially different from the estimate of the effect**

**Very low quality: We have very little confidence in the effect estimate: The true effect is likely to be substantially different from the estimate of effect**

## References:

1. Kavanaugh A, McInnes I, Mease P, Krueger GG, Gladman D, Gomez-Reino J, et al. Golimumab, a new human tumor necrosis factor alpha antibody, administered every four weeks as a subcutaneous injection in psoriatic arthritis: Twenty-four-week efficacy and safety results of a randomized, placebo-controlled study. *Arthritis Rheum.* 2009;60(4):976-986.
2. Mease PJ, Fleischmann R, Deodhar AA, Wollenhaupt J, Khraishi M, Kielar D, et al. Effect of certolizumab pegol on signs and symptoms in patients with psoriatic arthritis: 24-week results of a Phase 3 double-blind randomised placebo-controlled study (RAPID-PsA). *Ann Rheum Dis.* 2014;73(1):48-55.
3. Gladman D, Fleischmann R, Coteur G, Woltering F, Mease PJ. Effect of certolizumab pegol on multiple facets of psoriatic arthritis as reported by patients: 24-week patient-reported outcome results of a phase III, multicenter study. *Arthritis Care Res (Hoboken).* 2014;66(7):1085-1092.
4. Cutolo M, Myerson GE, Fleischmann RM, Liote F, Diaz-Gonzalez F, Van den Bosch F, et al. A Phase III, Randomized, Controlled Trial of Apremilast in Patients with Psoriatic Arthritis: Results of the PALACE 2 Trial. *J Rheumatol.* 2016;43(9):1724-1734.
5. Edwards CJ, Blanco FJ, Crowley J, Birbara CA, Jaworski J, Aelion J, et al. Apremilast, an oral phosphodiesterase 4 inhibitor, in patients with psoriatic arthritis and current skin involvement: a phase III, randomised, controlled trial (PALACE 3). *Ann Rheum Dis.* 2016;75(6):1065-1073.
6. Kavanaugh A, Mease PJ, Gomez-Reino JJ, Adebajo AO, Wollenhaupt J, Gladman DD, et al. Longterm (52-week) results of a phase III randomized, controlled trial of apremilast in patients with psoriatic arthritis. *J Rheumatol.* 2015;42(3):479-488.

**PICO 50. In adult patients with active PsA and predominant enthesitis despite treatment with OSM, what are the benefits and harms of switching to OSM compared to switching to IL12/23i?**

**Summary:** This question was indirectly addressed using 5 placebo-controlled RCTs (6 publications).[1-6] Apremilast was the only OSM with data suitable for this question. Two RCTs comparing ustekinumab versus placebo[1,2] and three studies comparing apremilast versus placebo[3-6] were included. None of the studies stratified outcomes by history of OSM use, which adds another layer of indirectness. However, the majority of patients in these studies had a history of OSM use, usually methotrexate.

Enthesitis and adverse events could not be compared using adjusted indirect comparisons, so these findings are presented for drug versus placebo in Table 1. Enthesitis scores (MASES) were provided by both ustekinumab studies and two of the three apremilast studies. Only one of the apremilast studies[4] provided sufficient information to import into the comparison tables. The other[6] reported a non-significant trend toward greater improvement in MASES score in patients receiving apremilast compared with placebo; the magnitude of difference was smaller than was reported by Kavanaugh et al.[4] Ustekinumab was superior to placebo for reducing the number of patients with MASES score >1. The apremilast groups had higher liver toxicity (non-significant difference with imprecision in the CI), but a statistically significant increase in GI intolerance. Serious infection rates did not differ significantly between ustekinumab and placebo groups.

Quality of evidence across all critical outcomes: Low

| <b>Table 1. OSM or IL12/23i compared to placebo in patients with enthesitis despite OSM</b>                                    |              |               |              |             |                  |                             |                       |                      |                          |                              |                                      |
|--------------------------------------------------------------------------------------------------------------------------------|--------------|---------------|--------------|-------------|------------------|-----------------------------|-----------------------|----------------------|--------------------------|------------------------------|--------------------------------------|
| Bibliography: PICO 50: In patients with PsA and enthesitis despite OSM, benefit/harm of switching to OSM compared to IL12/23i. |              |               |              |             |                  |                             |                       |                      |                          |                              |                                      |
| Quality assessment                                                                                                             |              |               |              |             |                  |                             | Summary of findings   |                      |                          |                              |                                      |
| Nº of participants (studies)<br>Follow-up                                                                                      | Risk of bias | Inconsistency | Indirectness | Imprecision | Publication bias | Overall quality of evidence | Study event rates (%) |                      | Relative effect (95% CI) | Anticipated absolute effects |                                      |
|                                                                                                                                |              |               |              |             |                  |                             | With placebo          | With OSM or IL12/23i |                          | Risk with placebo            | Risk difference with OSM or IL12/23i |
| <b>Enthesitis score (MASES) (LS mean change) – Apremilast vs. placebo</b>                                                      |              |               |              |             |                  |                             |                       |                      |                          |                              |                                      |

**Table 1. OSM or IL12/23i compared to placebo in patients with enthesitis despite OSM**

Bibliography: PICO 50: In patients with PsA and enthesitis despite OSM, benefit/harm of switching to OSM compared to IL12/23i.

| Quality assessment                                                   |             |                      |                      |             |      |                  | Summary of findings |                    |                                                                |                                                                 |                                                                |
|----------------------------------------------------------------------|-------------|----------------------|----------------------|-------------|------|------------------|---------------------|--------------------|----------------------------------------------------------------|-----------------------------------------------------------------|----------------------------------------------------------------|
| 326<br>(1 RCT)                                                       | not serious | serious <sup>a</sup> | serious <sup>b</sup> | Not serious | none | ⊕⊕○○<br>LOW      | 165                 | 161                | -                                                              | The mean enthesitis score (MASES) (LS mean change) was <b>0</b> | MD <b>0.9 lower</b><br>(1.73 lower to 0.07 lower)              |
| <b>Enthesitis (MASES score &gt;1) – Ustekinumab vs. placebo</b>      |             |                      |                      |             |      |                  |                     |                    |                                                                |                                                                 |                                                                |
| 633<br>(2 RCTs)                                                      | not serious | not serious          | serious <sup>b</sup> | not serious | none | ⊕⊕⊕○<br>MODERATE | 171/205<br>(83.4%)  | 288/428<br>(67.3%) | <b>RR 0.81</b><br>(0.74 to 0.88)<br><br><b>Favors IL12/23i</b> | 834 per 1,000<br>(0.834)                                        | <b>158 fewer per 1,000 (0.158)</b><br>(217 fewer to 100 fewer) |
| <b>Serious infection – Ustekinumab vs. placebo</b>                   |             |                      |                      |             |      |                  |                     |                    |                                                                |                                                                 |                                                                |
| 925<br>(2 RCTs)                                                      | not serious | serious              | serious <sup>a</sup> | not serious | none | ⊕⊕⊕○<br>MODERATE | 2/309<br>(0.6%)     | 4/616<br>(0.6%)    | <b>RR 0.84</b><br>(0.20 to 3.50)<br><br><b>No difference</b>   | 6 per 1,000<br>(0.006)                                          | <b>1 fewer per 1,000</b><br>(5 fewer to 15 more)               |
| <b>GI intolerance (diarrhea and nausea) – Apremilast vs. placebo</b> |             |                      |                      |             |      |                  |                     |                    |                                                                |                                                                 |                                                                |

**Table 1. OSM or IL12/23i compared to placebo in patients with enthesitis despite OSM**

Bibliography: PICO 50: In patients with PsA and enthesitis despite OSM, benefit/harm of switching to OSM compared to IL12/23i.

| Quality assessment                                         |             |             |                      |                      |      |                  | Summary of findings |                    |                                                               |                         |                                                             |
|------------------------------------------------------------|-------------|-------------|----------------------|----------------------|------|------------------|---------------------|--------------------|---------------------------------------------------------------|-------------------------|-------------------------------------------------------------|
| 983<br>(3 RCTs)                                            | not serious | not serious | serious <sup>b</sup> | not serious          | none | ⊕⊕⊕○<br>MODERATE | 38/486<br>(7.8%)    | 162/497<br>(32.6%) | <b>RR 4.17</b><br>(3.00 to 5.80)<br><br><b>Favors placebo</b> | 78 per 1,000<br>(0.078) | <b>248 more per 1,000 (0.248)</b><br>(156 more to 375 more) |
| <b>Liver toxicity<sup>d</sup> – Apremilast vs. placebo</b> |             |             |                      |                      |      |                  |                     |                    |                                                               |                         |                                                             |
| 984<br>(3 RCTs)                                            | not serious | not serious | serious <sup>b</sup> | serious <sup>c</sup> | none | ⊕⊕○○<br>LOW      | 1/492<br>(0.2%)     | 6/492<br>(1.2%)    | <b>RR 3.32</b><br>(0.67 to 16.35)                             | 2 per 1,000<br>(0.002)  | <b>5 more per 1,000 (0.005)</b><br>(1 fewer to 31 more)     |

CI: Confidence interval; RR: Risk ratio

a. A second study, by Edwards et al 2016, reported a smaller improvement in enthesitis score but could not be imported to RevMan. See discussion in summary paragraph.

b. Indirect comparison to placebo

c. Wide CI crossing significant effect and no-effect lines

d. Studies had slightly different cutoffs for abnormality: ALT > 150 u/l (2 studies), ALT > upper normal limit (1 study)

Working Group quality of evidence categories:

**High quality: We are very confident that the true effect lies close to that of the estimate of the effect**

**Moderate quality: We are moderately confident in the effect estimate: The true effect is likely to be close to the estimate of the effect, but there is a possibility that it is substantially different**

**Low quality: Our confidence in the effect estimate is limited: The true effect may be substantially different from the estimate of the effect**

**Very low quality: We have very little confidence in the effect estimate: The true effect is likely to be substantially different from the estimate of effect**

References:

1. McInnes IB, Kavanaugh A, Gottlieb AB, Puig L, Rahman P, Ritchlin C, et al. Efficacy and safety of ustekinumab in patients with active psoriatic arthritis: 1 year results of the phase 3, multicentre, double-blind, placebo-controlled PSUMMIT 1 trial. *Lancet*. 2013;382(9894):780-789.
2. Ritchlin C, Rahman P, Kavanaugh A, McInnes IB, Puig L, Li S, et al. Efficacy and safety of the anti-IL-12/23 p40 monoclonal antibody, ustekinumab, in patients with active psoriatic arthritis despite conventional non-biological and biological anti-tumour necrosis factor therapy: 6-month and 1-year results of the phase 3, multicentre, double-blind, placebo-controlled, randomised PSUMMIT 2 trial. *Ann Rheum Dis*. 2014;73(6):990-999.
3. Kavanaugh A, Mease PJ, Gomez-Reino JJ, Adebajo AO, Wollenhaupt J, Gladman DD, et al. Longterm (52-week) results of a phase III randomized, controlled trial of apremilast in patients with psoriatic arthritis. *J Rheumatol*. 2015;42(3):479-488.
4. Kavanaugh A, Mease PJ, Gomez-Reino JJ, Adebajo AO, Wollenhaupt J, Gladman DD, et al. Treatment of psoriatic arthritis in a phase 3 randomised, placebo-controlled trial with apremilast, an oral phosphodiesterase 4 inhibitor. *Ann Rheum Dis*. 2014;73(6):1020-1026.
5. Cutolo M, Myerson GE, Fleischmann RM, Liote F, Diaz-Gonzalez F, Van den Bosch F, et al. A Phase III, Randomized, Controlled Trial of Apremilast in Patients with Psoriatic Arthritis: Results of the PALACE 2 Trial. *J Rheumatol*. 2016;43(9):1724-1734.
6. Edwards CJ, Blanco FJ, Crowley J, Birbara CA, Jaworski J, Aelion J, et al. Apremilast, an oral phosphodiesterase 4 inhibitor, in patients with psoriatic arthritis and current skin involvement: a phase III, randomised, controlled trial (PALACE 3). *Ann Rheum Dis*. 2016;75(6):1065-1073.

**PICO 51. In adult patients with active PsA and predominant enthesitis despite treatment with OSM, what are the benefits and harms of switching to OSM compared to switching to IL-17i?**

Summary: This question was indirectly addressed using 7 placebo-controlled RCTs (in 8 publications).[1-8] Apremilast was the only OSM with data suitable for this question. In all, four RCTs comparing IL17i (ixekizumab, secukinumab and brodalumab)[1-4] versus placebo and three studies comparing apremilast versus placebo[5-8] were included. None of the studies stratified outcomes by history of OSM use, which adds another layer of indirectness. However, the majority of patients in these studies had a history of OSM use, usually methotrexate.

Enthesitis and adverse events could not be compared using adjusted indirect comparisons, so these findings are presented for drug versus placebo in Table 1. Enthesitis scores (MASSES) were provided by two of the three apremilast studies. Only one of the apremilast studies[6] provided sufficient information to import into the comparison tables. The other[8] reported a non-significant trend toward greater improvement in MASSES score in patients receiving apremilast compared with placebo; the magnitude of difference was smaller than was reported by Kavanaugh et al.[6] IL17i was superior to placebo for increasing the number of patients with enthesitis resolution. Two IL17i studies compared mean change in Leeds Enthesitis Index score in drug vs. placebo. One trial found a significant benefit of ixekizumab over placebo, while the other trial found no significant difference in change score between brodalumab and placebo (the estimate was imprecise). The apremilast groups had higher liver toxicity (non-significant difference with imprecision in the CI), but a statistically significant increase in GI intolerance. Rates of serious infection did not differ significantly between IL17i and placebo groups, but the effect size was imprecise.

Quality of evidence across all critical outcomes: Low

| <b>Table 1. OSM or IL17i compared to placebo in patients with enthesitis despite OSM</b><br>Bibliography: In patients with PsA and enthesitis despite OSM, benefit/harm of switching to IL17i compared to OSM. |              |               |              |             |                  |                             |                       |                   |                          |                              |                                   |
|----------------------------------------------------------------------------------------------------------------------------------------------------------------------------------------------------------------|--------------|---------------|--------------|-------------|------------------|-----------------------------|-----------------------|-------------------|--------------------------|------------------------------|-----------------------------------|
| Quality assessment                                                                                                                                                                                             |              |               |              |             |                  |                             | Summary of findings   |                   |                          |                              |                                   |
| Nº of participants (studies)<br>Follow-up                                                                                                                                                                      | Risk of bias | Inconsistency | Indirectness | Imprecision | Publication bias | Overall quality of evidence | Study event rates (%) |                   | Relative effect (95% CI) | Anticipated absolute effects |                                   |
|                                                                                                                                                                                                                |              |               |              |             |                  |                             | With placebo          | With OSM or IL17i |                          | Risk with placebo            | Risk difference with OSM or IL17i |
| <b>Enthesitis score (MASSES) (LS mean change) – Apremilast vs. placebo</b>                                                                                                                                     |              |               |              |             |                  |                             |                       |                   |                          |                              |                                   |

**Table 1. OSM or IL17i compared to placebo in patients with enthesitis despite OSM**

Bibliography: In patients with PsA and enthesitis despite OSM, benefit/harm of switching to IL17i compared to OSM.

| Quality assessment                                                        |             |                      |                      |                      |      |                  | Summary of findings |                    |                                                             |                          |                                                             |
|---------------------------------------------------------------------------|-------------|----------------------|----------------------|----------------------|------|------------------|---------------------|--------------------|-------------------------------------------------------------|--------------------------|-------------------------------------------------------------|
| 326<br>(1 RCT)                                                            | not serious | serious <sup>a</sup> | serious <sup>b</sup> | not serious          | none | ⊕⊕○○<br>LOW      | 165                 | 161                | -                                                           | -                        | MD <b>0.9 lower</b><br>(1.73 lower to 0.07 lower)           |
| <b>Enthesitis Resolution – IL17i vs. placebo</b>                          |             |                      |                      |                      |      |                  |                     |                    |                                                             |                          |                                                             |
| 822<br>(3 RCTs)                                                           | not serious | not serious          | serious <sup>b</sup> | not serious          | none | ⊕⊕⊕○<br>MODERATE | 58/284<br>(20.4%)   | 242/538<br>(45.0%) | <b>RR 2.33</b><br>(1.80 to 3.02)<br><br><b>Favors IL17i</b> | 204 per 1,000<br>(0.204) | <b>272 more per 1,000 (0.272)</b><br>(163 more to 413 more) |
| <b>Enthesitis score (Leeds Enthesitis Index) – Ixekizumab vs. placebo</b> |             |                      |                      |                      |      |                  |                     |                    |                                                             |                          |                                                             |
| 197 (1 RCT)                                                               | not serious | not serious          | serious <sup>b</sup> | not serious          | none | ⊕⊕⊕○<br>MODERATE | 102                 | 95                 | -                                                           | -                        | MD <b>0.7 lower</b><br>(1.37 lower to 0.03 lower)           |
| <b>Enthesitis score (Leeds Enthesitis Index) – Brodalumab vs. placebo</b> |             |                      |                      |                      |      |                  |                     |                    |                                                             |                          |                                                             |
| 112 (1 RCT)                                                               | not serious | not serious          | serious <sup>b</sup> | serious <sup>d</sup> | none | ⊕⊕○○<br>LOW      | 55                  | 57                 | -                                                           | -                        | MD <b>0.1 lower</b><br>(1.06 lower to 0.86 higher)          |



**Table 1. OSM or IL17i compared to placebo in patients with enthesitis despite OSM**

Bibliography: In patients with PsA and enthesitis despite OSM, benefit/harm of switching to IL17i compared to OSM.

| Quality assessment                                                   |             |             |                      |                      |      | Summary of findings |                  |                    |                                                           |                         |                                                             |
|----------------------------------------------------------------------|-------------|-------------|----------------------|----------------------|------|---------------------|------------------|--------------------|-----------------------------------------------------------|-------------------------|-------------------------------------------------------------|
| <b>Serious infection – IL17i vs. placebo</b>                         |             |             |                      |                      |      |                     |                  |                    |                                                           |                         |                                                             |
| 1189<br>(3 RCTs)                                                     | not serious | not serious | serious <sup>b</sup> | serious <sup>d</sup> | none | ⊕⊕○○<br>LOW         | 5/406<br>(1.2%)  | 18/685<br>(2.6%)   | <b>RR 1.79</b><br>(0.75 to 4.30)                          | 12 per 1,000<br>(0.012) | <b>9 more per 1,000 (0.009)</b><br>(3 fewer to 52 more)     |
| <b>GI intolerance (diarrhea and nausea) – Apremilast vs. placebo</b> |             |             |                      |                      |      |                     |                  |                    |                                                           |                         |                                                             |
| 983<br>(3 RCTs)                                                      | not serious | not serious | serious <sup>b</sup> | not serious          | none | ⊕⊕⊕○<br>MODERATE    | 38/486<br>(7.8%) | 162/497<br>(32.6%) | <b>RR 4.17</b><br>(3.00 to 5.80)<br><b>Favors placebo</b> | 78 per 1,000<br>(0.078) | <b>248 more per 1,000 (0.248)</b><br>(156 more to 375 more) |
| <b>Liver toxicity<sup>e</sup> – Apremilast vs. placebo</b>           |             |             |                      |                      |      |                     |                  |                    |                                                           |                         |                                                             |
| 984<br>(3 RCTs)                                                      | not serious | not serious | serious <sup>b</sup> | serious <sup>d</sup> | none | ⊕⊕○○<br>LOW         | 1/492<br>(0.2%)  | 6/492<br>(1.2%)    | <b>RR 3.32</b><br>(0.67 to 16.35)                         | 2 per 1,000<br>(0.002)  | <b>5 more per 1,000 (0.005)</b><br>(1 fewer to 31 more)     |

CI: Confidence interval; RR: Risk ratio

a. A second study, by Edwards et al 2016, reported a smaller improvement in enthesitis score but could not be imported to RevMan. See discussion in summary paragraph.

b. Indirect comparison to placebo

c. Substantial heterogeneity between secukinumab studies.

d. Wide CI crossing significant effect and no-effect lines

e. Studies had slightly different cutoffs for abnormality: ALT > 150 u/l (2 studies), ALT > upper normal limit (1 study)

Working Group quality of evidence categories:

**High quality: We are very confident that the true effect lies close to that of the estimate of the effect**

**Moderate quality: We are moderately confident in the effect estimate: The true effect is likely to be close to the estimate of the effect, but there is a possibility that it is substantially different**

**Low quality: Our confidence in the effect estimate is limited: The true effect may be substantially different from the estimate of the effect**

**Very low quality: We have very little confidence in the effect estimate: The true effect is likely to be substantially different from the estimate of effect**

## References:

1. McInnes IB, Mease PJ, Kirkham B, Kavanaugh A, Ritchlin CT, Rahman P, et al. Secukinumab, a human anti-interleukin-17A monoclonal antibody, in patients with psoriatic arthritis (FUTURE 2): a randomised, double-blind, placebo-controlled, phase 3 trial. *Lancet*. 2015;386(9999):1137-1146.
2. Mease PJ, Genovese MC, Greenwald MW, Ritchlin CT, Beaulieu AD, Deodhar A, et al. Brodalumab, an anti-IL17RA monoclonal antibody, in psoriatic arthritis. *N Engl J Med*. 2014;370(24):2295-2306.
3. Mease PJ, van der Heijde D, Ritchlin CT, Okada M, Cuchacovich RS, Shuler CL, et al. Ixekizumab, an interleukin-17A specific monoclonal antibody, for the treatment of biologic-naive patients with active psoriatic arthritis: results from the 24-week randomised, double-blind, placebo-controlled and active (adalimumab)-controlled period of the phase III trial SPIRIT-P1. *Ann Rheum Dis*. 2017;76(1):79-87.
4. Mease PJ, McInnes IB, Kirkham B, Kavanaugh A, Rahman P, van der Heijde D, et al. Secukinumab Inhibition of Interleukin-17A in Patients with Psoriatic Arthritis. *N Engl J Med*. 2015;373(14):1329-1339.
5. Kavanaugh A, Mease PJ, Gomez-Reino JJ, Adebajo AO, Wollenhaupt J, Gladman DD, et al. Longterm (52-week) results of a phase III randomized, controlled trial of apremilast in patients with psoriatic arthritis. *J Rheumatol*. 2015;42(3):479-488.
6. Kavanaugh A, Mease PJ, Gomez-Reino JJ, Adebajo AO, Wollenhaupt J, Gladman DD, et al. Treatment of psoriatic arthritis in a phase 3 randomised, placebo-controlled trial with apremilast, an oral phosphodiesterase 4 inhibitor. *Ann Rheum Dis*. 2014;73(6):1020-1026.
7. Cutolo M, Myerson GE, Fleischmann RM, Liote F, Diaz-Gonzalez F, Van den Bosch F, et al. A Phase III, Randomized, Controlled Trial of Apremilast in Patients with Psoriatic Arthritis: Results of the PALACE 2 Trial. *J Rheumatol*. 2016;43(9):1724-1734.
8. Edwards CJ, Blanco FJ, Crowley J, Birbara CA, Jaworski J, Aelion J, et al. Apremilast, an oral phosphodiesterase 4 inhibitor, in patients with psoriatic arthritis and current skin involvement: a phase III, randomised, controlled trial (PALACE 3). *Ann Rheum Dis*. 2016;75(6):1065-1073.

**PICO 52. In adult patients with active PsA and predominant enthesitis despite treatment with OSM, what are the benefits and harms of switching to TNFi compared to switching to IL12/23i?**

**Summary:** This PICO was indirectly addressed by 4 studies (5 publications).[1-5] Two RCTs (3 publications) compared TNFis with placebo,[1-3] while two RCTs compared ustekinumab with placebo.[4,5]

Enthesitis and adverse events could not be compared using adjusted indirect comparisons, so these findings are presented for drug versus placebo in Table 1. Both ustekinumab and golimumab were superior to placebo in reducing the number of patients with enthesitis or the number of patients with severe enthesitis. There was no significant difference between TNFi and placebo in serious infections, nausea and diarrhea, but all findings were imprecise. Ustekinumab showed no significant difference with placebo in rate of serious infections.

Quality of evidence across all critical outcomes: Low

| <b>Table 1. TNFi or IL12/23i compared to placebo in patients with enthesitis despite OSM</b>             |              |               |                      |             |                  |                             |                       |                       |                                                            |                              |                                                                |
|----------------------------------------------------------------------------------------------------------|--------------|---------------|----------------------|-------------|------------------|-----------------------------|-----------------------|-----------------------|------------------------------------------------------------|------------------------------|----------------------------------------------------------------|
| Bibliography: PICO 52: TNFi compared to IL12/23i for patients with active PsA and enthesitis despite OSM |              |               |                      |             |                  |                             |                       |                       |                                                            |                              |                                                                |
| Quality assessment                                                                                       |              |               |                      |             |                  |                             | Summary of findings   |                       |                                                            |                              |                                                                |
| Nº of participants (studies)<br>Follow-up                                                                | Risk of bias | Inconsistency | Indirectness         | Imprecision | Publication bias | Overall quality of evidence | Study event rates (%) |                       | Relative effect (95% CI)                                   | Anticipated absolute effects |                                                                |
|                                                                                                          |              |               |                      |             |                  |                             | With placebo          | With TNFi or IL12/23i |                                                            | Risk with placebo            | Risk difference with TNFi or IL12/23i                          |
| <b>Enthesitis (MASES) score &gt;1 – Ustekinumab vs. placebo</b>                                          |              |               |                      |             |                  |                             |                       |                       |                                                            |                              |                                                                |
| 633 (2 RCTs)                                                                                             | not serious  | not serious   | serious <sup>a</sup> | not serious | none             | ⊕⊕⊕○<br>MODERATE            | 171/205 (83.4%)       | 288/428 (67.3%)       | <b>RR 0.81</b><br>(0.74 to 0.88)<br><b>Favors IL12/23i</b> | 834 per 1,000 (0.834)        | <b>158 fewer per 1,000 (0.158)</b><br>(217 fewer to 100 fewer) |
| <b>Enthesitis, 14 weeks – Golimumab vs. placebo</b>                                                      |              |               |                      |             |                  |                             |                       |                       |                                                            |                              |                                                                |

**Table 1. TNFi or IL12/23i compared to placebo in patients with enthesitis despite OSM**

Bibliography: PICO 52: TNFi compared to IL12/23i for patients with active PsA and enthesitis despite OSM

| Quality assessment                                 |             |             |                      |                      |      | Summary of findings |                   |                   |                                                              |                          |                                                               |
|----------------------------------------------------|-------------|-------------|----------------------|----------------------|------|---------------------|-------------------|-------------------|--------------------------------------------------------------|--------------------------|---------------------------------------------------------------|
| 247<br>(1 RCT)                                     | not serious | not serious | serious <sup>a</sup> | not serious          | none | ⊕⊕⊕○<br>MODERATE    | 75/105<br>(71.4%) | 78/142<br>(54.9%) | <b>RR 0.77</b><br>(0.63 to 0.93)<br><br><b>Favors GOL</b>    | 714 per 1,000<br>(0.714) | <b>164 fewer per 1,000 (0.164)</b><br>(264 fewer to 50 fewer) |
| <b>Serious infection – Ustekinumab vs. placebo</b> |             |             |                      |                      |      |                     |                   |                   |                                                              |                          |                                                               |
| 925<br>(2 RCTs)                                    | not serious | serious     | serious <sup>a</sup> | not serious          | none | ⊕⊕⊕○<br>MODERATE    | 2/309<br>(0.6%)   | 4/616<br>(0.6%)   | <b>RR 0.84</b><br>(0.20 to 3.50)<br><br><b>No difference</b> | 6 per 1,000<br>(0.006)   | <b>1 fewer per 1,000 (5 fewer to 15 more)</b>                 |
| <b>Serious infection – TNFi vs. placebo</b>        |             |             |                      |                      |      |                     |                   |                   |                                                              |                          |                                                               |
| 533<br>(2 RCTs)                                    | not serious | not serious | serious <sup>a</sup> | serious <sup>b</sup> | none | ⊕⊕○○<br>LOW         | 5/249<br>(2.0%)   | 3/284<br>(1.1%)   | <b>RR 0.55</b><br>(0.11 to 2.77)                             | 20 per 1,000<br>(0.020)  | <b>9 fewer per 1,000 (0.009)</b><br>(18 fewer to 36 more)     |
| <b>Diarrhea – TNFi vs. placebo</b>                 |             |             |                      |                      |      |                     |                   |                   |                                                              |                          |                                                               |

**Table 1. TNFi or IL12/23i compared to placebo in patients with enthesitis despite OSM**

Bibliography: PICO 52: TNFi compared to IL12/23i for patients with active PsA and enthesitis despite OSM

| Quality assessment               |             |             |                      |                      |      |             | Summary of findings |                 |                                  |                         |                                                            |
|----------------------------------|-------------|-------------|----------------------|----------------------|------|-------------|---------------------|-----------------|----------------------------------|-------------------------|------------------------------------------------------------|
| 259<br>(1 RCT)                   | not serious | not serious | serious <sup>a</sup> | serious <sup>b</sup> | none | ⊕⊕○○<br>LOW | 4/113<br>(3.5%)     | 5/146<br>(3.4%) | <b>RR 0.97</b><br>(0.27 to 3.52) | 35 per 1,000<br>(0.035) | <b>1 fewer per 1,000 (0.001)</b><br>(26 fewer to 89 more)  |
| <b>Nausea – TNFi vs. placebo</b> |             |             |                      |                      |      |             |                     |                 |                                  |                         |                                                            |
| 259<br>(1 RCT)                   | not serious | not serious | serious <sup>a</sup> | serious <sup>b</sup> | none | ⊕⊕○○<br>LOW | 5/113<br>(4.4%)     | 4/146<br>(2.7%) | <b>RR 0.62</b><br>(0.17 to 2.25) | 44 per 1,000<br>(0.044) | <b>17 fewer per 1,000 (0.017)</b><br>(37 fewer to 55 more) |

CI: Confidence interval; RR: Risk ratio

a. Indirect comparison to placebo

b. Wide CI crossing significant effect and no-effect lines

Working Group quality of evidence categories:

**High quality:** We are very confident that the true effect lies close to that of the estimate of the effect

**Moderate quality:** We are moderately confident in the effect estimate: The true effect is likely to be close to the estimate of the effect, but there is a possibility that it is substantially different

**Low quality:** Our confidence in the effect estimate is limited: The true effect may be substantially different from the estimate of the effect

**Very low quality:** We have very little confidence in the effect estimate: The true effect is likely to be substantially different from the estimate of effect

**References:**

1. Kavanaugh A, McInnes I, Mease P, Krueger GG, Gladman D, Gomez-Reino J, et al. Golimumab, a new human tumor necrosis factor alpha antibody, administered every four weeks as a subcutaneous injection in psoriatic arthritis: Twenty-four-week efficacy and safety results of a randomized, placebo-controlled study. *Arthritis Rheum.* 2009;60(4):976-986.

2. Mease PJ, Fleischmann R, Deodhar AA, Wollenhaupt J, Khraishi M, Kielar D, et al. Effect of certolizumab pegol on signs and symptoms in patients with psoriatic arthritis: 24-week results of a Phase 3 double-blind randomised placebo-controlled study (RAPID-PsA). *Ann Rheum Dis*. 2014;73(1):48-55.
3. Gladman D, Fleischmann R, Coteur G, Woltering F, Mease PJ. Effect of certolizumab pegol on multiple facets of psoriatic arthritis as reported by patients: 24-week patient-reported outcome results of a phase III, multicenter study. *Arthritis Care Res (Hoboken)*. 2014;66(7):1085-1092.
4. McInnes IB, Kavanaugh A, Gottlieb AB, Puig L, Rahman P, Ritchlin C, et al. Efficacy and safety of ustekinumab in patients with active psoriatic arthritis: 1 year results of the phase 3, multicentre, double-blind, placebo-controlled PSUMMIT 1 trial. *Lancet*. 2013;382(9894):780-789.
5. Ritchlin C, Rahman P, Kavanaugh A, McInnes IB, Puig L, Li S, et al. Efficacy and safety of the anti-IL-12/23 p40 monoclonal antibody, ustekinumab, in patients with active psoriatic arthritis despite conventional non-biological and biological anti-tumour necrosis factor therapy: 6-month and 1-year results of the phase 3, multicentre, double-blind, placebo-controlled, randomised PSUMMIT 2 trial. *Ann Rheum Dis*. 2014;73(6):990-999.

**PICO 53. In adult patients with active PsA and predominant enthesitis despite treatment with OSM, what are the benefits and harms of switching to TNFi compared to switching to IL17i?**

Summary: This PICO was addressed indirectly by 5 double-blind RCTs (6 publications) involving PsA patients or psoriasis patients comparing either TNFi or IL17i to placebo.[1-6] The relevant outcomes included enthesitis resolution, Leeds enthesitis index change from baseline, and adverse events. All drugs showed statistically significant improvements in enthesitis resolution over placebo.

Since both TNFi and IL17i studies reported enthesitis resolution, we compared the findings for this outcome between drug classes using adjusted indirect comparisons (Table 1). Golimumab was the only TNFi with a study that reported this outcome. The comparison found no significant difference between golimumab and IL17i (secukinumab and ixekizumab) but was imprecise due to a wide CI that overlapped the line of no effect.

Adverse events are presented for drug versus placebo in Table 2. Both IL17i and golimumab were superior to placebo in reducing the number of patients with enthesitis. Two IL17i studies compared mean change in Leeds Enthesitis Index score in drug vs. placebo. One trial found a significant benefit of ixekizumab over placebo, while the other trial found no significant difference in change score between brodalumab and placebo (the estimate was imprecise). There was no significant difference between TNFi and placebo in serious infections, nausea and diarrhea, but all findings were imprecise. IL17i showed no significant difference with placebo in rate of serious infections.

Quality of evidence across all critical outcomes: Low

| <p align="center"><b>Table 1. TNFi compared to IL17i for patients with active PsA and predominant enthesitis despite OSM</b></p> <p align="center">Bibliography: PICO 53: TNFi compared to IL17i for patients with active PsA and enthesitis despite OSM</p> |              |               |              |             |                  |                             |                     |      |                          |                              |                           |
|--------------------------------------------------------------------------------------------------------------------------------------------------------------------------------------------------------------------------------------------------------------|--------------|---------------|--------------|-------------|------------------|-----------------------------|---------------------|------|--------------------------|------------------------------|---------------------------|
| Quality assessment                                                                                                                                                                                                                                           |              |               |              |             |                  |                             | Summary of findings |      |                          |                              |                           |
| Nº of participants (studies)<br>Follow-up                                                                                                                                                                                                                    | Risk of bias | Inconsistency | Indirectness | Imprecision | Publication bias | Overall quality of evidence |                     |      | Relative effect (95% CI) | Anticipated absolute effects |                           |
|                                                                                                                                                                                                                                                              |              |               |              |             |                  |                             | IL17i               | TNFi |                          | Risk with IL17i              | Risk difference with TNFi |
| <p><b>Enthesitis resolution, Bucher adjusted indirect comparison</b></p>                                                                                                                                                                                     |              |               |              |             |                  |                             |                     |      |                          |                              |                           |

**Table 1. TNFi compared to IL17i for patients with active PsA and predominant enthesitis despite OSM**

Bibliography: PICO 53: TNFi compared to IL17i for patients with active PsA and enthesitis despite OSM

| Quality assessment |             |             |                      |                      |      |             | Summary of findings |     |                                  |                       |                                                              |
|--------------------|-------------|-------------|----------------------|----------------------|------|-------------|---------------------|-----|----------------------------------|-----------------------|--------------------------------------------------------------|
| 1069 (4 RCTs)      | Not serious | Not serious | Serious <sup>a</sup> | Serious <sup>b</sup> | None | ⊕⊕○○<br>LOW | IL17i               | GOL | <b>RR 0.71</b><br>(0.39 to 1.30) | 450 per 1,000 (0.450) | <b>130 fewer per 1000 (0.130)</b><br>(274 fewer to 135 more) |

CI: Confidence interval; RR: Risk ratio

- a. Indirect comparison, all studies compared drug to placebo, only one trial had 100% patients with prior OSM exposure, most had 50-83% of patients with prior OSM exposure.
- b. Wide 95% CI

**Table 2. TNFi or IL17i compared to placebo in patients with enthesitis despite OSM**

Bibliography: PICO 53: TNFi compared to IL17i for patients with active PsA and enthesitis despite OSM

| Quality assessment                               |              |               |              |             |                  |                             | Summary of findings   |                    |                          |                              |                                    |
|--------------------------------------------------|--------------|---------------|--------------|-------------|------------------|-----------------------------|-----------------------|--------------------|--------------------------|------------------------------|------------------------------------|
| No of participants (studies)<br>Follow-up        | Risk of bias | Inconsistency | Indirectness | Imprecision | Publication bias | Overall quality of evidence | Study event rates (%) |                    | Relative effect (95% CI) | Anticipated absolute effects |                                    |
|                                                  |              |               |              |             |                  |                             | With placebo          | With TNFi or IL17i |                          | Risk with placebo            | Risk difference with TNFi or IL17i |
| <b>Enthesitis Resolution – IL17i vs. placebo</b> |              |               |              |             |                  |                             |                       |                    |                          |                              |                                    |



**Table 2. TNFi or IL17i compared to placebo in patients with enthesitis despite OSM**

Bibliography: PICO 53: TNFi compared to IL17i for patients with active PsA and enthesitis despite OSM

| Quality assessment                                                        |             |             |                      |                      |      |                  | Summary of findings |                    |                                                             |                          |                                                               |
|---------------------------------------------------------------------------|-------------|-------------|----------------------|----------------------|------|------------------|---------------------|--------------------|-------------------------------------------------------------|--------------------------|---------------------------------------------------------------|
| 822<br>(3 RCTs)                                                           | not serious | not serious | serious <sup>1</sup> | not serious          | none | ⊕⊕⊕○<br>MODERATE | 58/284<br>(20.4%)   | 242/538<br>(45.0%) | <b>RR 2.23</b><br>(1.36 to 3.66)<br><br><b>Favors IL17i</b> | 204 per 1,000<br>(0.204) | <b>251 more per 1,000 (0.251)</b><br>(74 more to 543 more)    |
| <b>Enthesitis, 14 weeks – Golimumab vs. placebo</b>                       |             |             |                      |                      |      |                  |                     |                    |                                                             |                          |                                                               |
| 247<br>(1 RCT)                                                            | not serious | not serious | serious <sup>a</sup> | not serious          | none | ⊕⊕⊕○<br>MODERATE | 75/105<br>(71.4%)   | 78/142<br>(54.9%)  | <b>RR 0.77</b><br>(0.63 to 0.93)<br><br><b>Favors GOL</b>   | 714 per 1,000<br>(0.714) | <b>164 fewer per 1,000 (0.164)</b><br>(264 fewer to 50 fewer) |
| <b>Enthesitis score (Leeds Enthesitis Index) – Ixekizumab vs. placebo</b> |             |             |                      |                      |      |                  |                     |                    |                                                             |                          |                                                               |
| 197 (1 RCT)                                                               | not serious | not serious | serious <sup>a</sup> | not serious          | none | ⊕⊕⊕○<br>MODERATE | 102                 | 95                 | -                                                           | -                        | <b>MD 0.7 lower</b><br>(1.37 lower to 0.03 lower)             |
| <b>Enthesitis score (Leeds Enthesitis Index) – Brodalumab vs. placebo</b> |             |             |                      |                      |      |                  |                     |                    |                                                             |                          |                                                               |
| 112 (1 RCT)                                                               | not serious | not serious | serious <sup>a</sup> | serious <sup>b</sup> | none | ⊕⊕○○<br>LOW      | 55                  | 57                 | -                                                           | -                        | <b>MD 0.1 lower</b><br>(1.06 lower to 0.86 higher)            |

**Table 2. TNFi or IL17i compared to placebo in patients with enthesitis despite OSM**

Bibliography: PICO 53: TNFi compared to IL17i for patients with active PsA and enthesitis despite OSM

| Quality assessment                           |             |             |                      |                      |      | Summary of findings |                 |                  |                                  |                         |                                                            |
|----------------------------------------------|-------------|-------------|----------------------|----------------------|------|---------------------|-----------------|------------------|----------------------------------|-------------------------|------------------------------------------------------------|
| <b>Serious infection – IL17i vs. placebo</b> |             |             |                      |                      |      |                     |                 |                  |                                  |                         |                                                            |
| 1189<br>(3 RCTs)                             | not serious | not serious | serious <sup>a</sup> | serious <sup>b</sup> | none | ⊕⊕○○<br>LOW         | 5/406<br>(1.2%) | 18/685<br>(2.6%) | <b>RR 1.79</b><br>(0.75 to 4.30) | 12 per 1,000<br>(0.012) | <b>9 more per 1,000 (0.009)</b><br>(3 fewer to 52 more)    |
| <b>Serious infection – TNFi vs. placebo</b>  |             |             |                      |                      |      |                     |                 |                  |                                  |                         |                                                            |
| 533<br>(2 RCTs)                              | not serious | not serious | serious <sup>a</sup> | serious <sup>b</sup> | none | ⊕⊕○○<br>LOW         | 5/249<br>(2.0%) | 3/284<br>(1.1%)  | <b>RR 0.55</b><br>(0.11 to 2.77) | 20 per 1,000<br>(0.020) | <b>9 fewer per 1,000 (0.009)</b><br>(18 fewer to 36 more)  |
| <b>Diarrhea – TNFi vs. placebo</b>           |             |             |                      |                      |      |                     |                 |                  |                                  |                         |                                                            |
| 259<br>(1 RCT)                               | not serious | not serious | serious <sup>a</sup> | serious <sup>b</sup> | none | ⊕⊕○○<br>LOW         | 4/113<br>(3.5%) | 5/146<br>(3.4%)  | <b>RR 0.97</b><br>(0.27 to 3.52) | 35 per 1,000<br>(0.035) | <b>1 fewer per 1,000 (0.001)</b><br>(26 fewer to 89 more)  |
| <b>Nausea – TNFi vs. placebo</b>             |             |             |                      |                      |      |                     |                 |                  |                                  |                         |                                                            |
| 259<br>(1 RCT)                               | not serious | not serious | serious <sup>a</sup> | serious <sup>b</sup> | none | ⊕⊕○○<br>LOW         | 5/113<br>(4.4%) | 4/146<br>(2.7%)  | <b>RR 0.62</b><br>(0.17 to 2.25) | 44 per 1,000<br>(0.44)  | <b>17 fewer per 1,000 (0.017)</b><br>(37 fewer to 55 more) |

**CI:** Confidence interval; **RR:** Risk ratio

a. Indirect comparison to placebo

b. Wide CI crossing significant effect and no-effect lines

Working Group quality of evidence categories:

**High quality: We are very confident that the true effect lies close to that of the estimate of the effect**

**Moderate quality: We are moderately confident in the effect estimate: The true effect is likely to be close to the estimate of the effect, but there is a possibility that it is substantially different**

**Low quality: Our confidence in the effect estimate is limited: The true effect may be substantially different from the estimate of the effect**

**Very low quality: We have very little confidence in the effect estimate: The true effect is likely to be substantially different from the estimate of effect**

## References:

1. McInnes IB, Mease PJ, Kirkham B, Kavanaugh A, Ritchlin CT, Rahman P, et al. Secukinumab, a human anti-interleukin-17A monoclonal antibody, in patients with psoriatic arthritis (FUTURE 2): a randomised, double-blind, placebo-controlled, phase 3 trial. *Lancet*. 2015;386(9999):1137-1146.
2. Mease PJ, McInnes IB, Kirkham B, Kavanaugh A, Rahman P, van der Heijde D, et al. Secukinumab Inhibition of Interleukin-17A in Patients with Psoriatic Arthritis. *N Engl J Med*. 2015;373(14):1329-1339.
3. Mease PJ, van der Heijde D, Ritchlin CT, Okada M, Cuchacovich RS, Shuler CL, et al. Ixekizumab, an interleukin-17A specific monoclonal antibody, for the treatment of biologic-naive patients with active psoriatic arthritis: results from the 24-week randomised, double-blind, placebo-controlled and active (adalimumab)-controlled period of the phase III trial SPIRIT-P1. *Ann Rheum Dis*. 2017;76(1):79-87.
4. Mease PJ, Fleischmann R, Deodhar AA, Wollenhaupt J, Khraishi M, Kielar D, et al. Effect of certolizumab pegol on signs and symptoms in patients with psoriatic arthritis: 24-week results of a Phase 3 double-blind randomised placebo-controlled study (RAPID-PsA). *Ann Rheum Dis*. 2014;73(1):48-55.
5. Kavanaugh A, McInnes I, Mease P, Krueger GG, Gladman D, Gomez-Reino J, et al. Golimumab, a new human tumor necrosis factor alpha antibody, administered every four weeks as a subcutaneous injection in psoriatic arthritis: Twenty-four-week efficacy and safety results of a randomized, placebo-controlled study. *Arthritis Rheum*. 2009;60(4):976-986.
6. Gladman D, Fleischmann R, Coteur G, Woltering F, Mease PJ. Effect of certolizumab pegol on multiple facets of psoriatic arthritis as reported by patients: 24-week patient-reported outcome results of a phase III, multicenter study. *Arthritis Care Res (Hoboken)*. 2014;66(7):1085-1092.

**PICO 54. In adult patients with active PsA and predominant enthesitis despite treatment with OSM, what are the benefits and harms of switching to IL12/23i compared to switching to IL17i?**

**Summary:** This PICO was addressed indirectly by 7 double-blind RCTs comparing either IL12/23i or IL17i to placebo in patients with PsA.[1-7] The relevant outcomes included enthesitis resolution, enthesitis (MASES) score >1, Leeds Enthesitis Index change from baseline, and adverse events.

Infection was the only relevant outcome that was comparable between IL12/23i studies and IL17i studies, so we compared infection rates between drug classes using adjusted indirect comparisons for various outcomes (Table 1). No significant between-class difference was identified, but the effect estimate had serious imprecision due to a wide CI that overlapped the line of no effect.

Enthesitis findings could not be compared using adjusted indirect comparisons because of differences in measurement between the drug classes, so these findings are presented for drug versus placebo in Table 2. IL17i and ustekinumab were superior to placebo in enthesitis resolution and reducing the number of patients with enthesitis and a MASES score >1, respectively. Two IL17i studies also compared mean change in Leeds Enthesitis Index score in drug vs. placebo. One trial found a significant benefit of ixekizumab over placebo, while the other trial found no significant difference in change score between brodalumab and placebo (the estimate was imprecise). Serious infection rates were so low for IL17i and ustekinumab that adjusted indirect comparison was not performed. Neither drug class showed significantly different serious infection rates compared to placebo groups, but the findings were imprecise for IL17i due to wide 95% confidence intervals.

Quality of evidence across all critical outcomes: Moderate

| <b>Table 1. IL12/23i compared to IL17i for patients with active PsA and predominant enthesitis despite OSM</b><br>Bibliography: PICO 54: IL12/23i compared to IL17i for patients with active PsA and enthesitis despite OSM |              |               |              |             |                  |                             |                     |       |                          |                              |                            |
|-----------------------------------------------------------------------------------------------------------------------------------------------------------------------------------------------------------------------------|--------------|---------------|--------------|-------------|------------------|-----------------------------|---------------------|-------|--------------------------|------------------------------|----------------------------|
| Quality assessment                                                                                                                                                                                                          |              |               |              |             |                  |                             | Summary of findings |       |                          |                              |                            |
| No of participants (studies)<br>Follow-up                                                                                                                                                                                   | Risk of bias | Inconsistency | Indirectness | Imprecision | Publication bias | Overall quality of evidence |                     |       | Relative effect (95% CI) | Anticipated absolute effects |                            |
|                                                                                                                                                                                                                             |              |               |              |             |                  |                             | IL12/23i            | IL17i |                          | Risk with IL12/23i           | Risk difference with IL17i |
| <b>Infection</b>                                                                                                                                                                                                            |              |               |              |             |                  |                             |                     |       |                          |                              |                            |

| <b>Table 1. IL12/23i compared to IL17i for patients with active PsA and predominant enthesitis despite OSM</b><br>Bibliography: PICO 54: IL12/23i compared to IL17i for patients with active PsA and enthesitis despite OSM |             |             |                          |                      |      |                     |          |       |                                  |                       |                                                           |
|-----------------------------------------------------------------------------------------------------------------------------------------------------------------------------------------------------------------------------|-------------|-------------|--------------------------|----------------------|------|---------------------|----------|-------|----------------------------------|-----------------------|-----------------------------------------------------------|
| Quality assessment                                                                                                                                                                                                          |             |             |                          |                      |      | Summary of findings |          |       |                                  |                       |                                                           |
| 1527 (4 RCTs)                                                                                                                                                                                                               | Not serious | Not serious | Not serious <sup>a</sup> | Serious <sup>b</sup> | None | ⊕⊕⊕○<br>MODERATE    | IL12/23i | IL17i | <b>RR 1.26</b><br>(0.81 to 1.97) | 211 per 1,000 (0.211) | <b>55 more per 1000 (0.055)</b><br>(40 fewer to 205 more) |

CI: Confidence interval; RR: Risk ratio

- a. Indirect comparison, all studies compared drug to placebo, only 50-83% of patients had prior OSM exposure in most trials, but patient characteristics and prior drug exposure are similar between drug classes.
- b. Wide 95% CI

| <b>Table 2. IL12/23i or IL17i compared to placebo in patients with enthesitis despite OSM</b><br>Bibliography: PICO 54: IL12/23i compared to IL17i for patients with active PsA and enthesitis despite OSM |              |               |              |             |                  |                             |                       |                        |                          |                              |                                        |
|------------------------------------------------------------------------------------------------------------------------------------------------------------------------------------------------------------|--------------|---------------|--------------|-------------|------------------|-----------------------------|-----------------------|------------------------|--------------------------|------------------------------|----------------------------------------|
| Quality assessment                                                                                                                                                                                         |              |               |              |             |                  | Summary of findings         |                       |                        |                          |                              |                                        |
| No of participants (studies)<br>Follow-up                                                                                                                                                                  | Risk of bias | Inconsistency | Indirectness | Imprecision | Publication bias | Overall quality of evidence | Study event rates (%) |                        | Relative effect (95% CI) | Anticipated absolute effects |                                        |
|                                                                                                                                                                                                            |              |               |              |             |                  |                             | With placebo          | With IL12/23i or IL17i |                          | Risk with placebo            | Risk difference with IL12/23i or IL17i |
| <b>Enthesitis Resolution – IL17i vs. placebo</b>                                                                                                                                                           |              |               |              |             |                  |                             |                       |                        |                          |                              |                                        |

**Table 2. IL12/23i or IL17i compared to placebo in patients with enthesitis despite OSM**

Bibliography: PICO 54: IL12/23i compared to IL17i for patients with active PsA and enthesitis despite OSM

| Quality assessment                                                        |             |             |                      |                      |      |                  | Summary of findings |                    |                                                                |                          |                                                                |
|---------------------------------------------------------------------------|-------------|-------------|----------------------|----------------------|------|------------------|---------------------|--------------------|----------------------------------------------------------------|--------------------------|----------------------------------------------------------------|
| 822<br>(3 RCTs)                                                           | not serious | not serious | serious <sup>a</sup> | not serious          | none | ⊕⊕⊕○<br>MODERATE | 58/284<br>(20.4%)   | 242/538<br>(45.0%) | <b>RR 2.23</b><br>(1.36 to 3.66)<br><br><b>Favors IL17i</b>    | 204 per 1,000<br>(0.204) | <b>251 more per 1,000 (0.251)</b><br>(74 more to 543 more)     |
| <b>Enthesitis score (Leeds Enthesitis Index) – Ixekizumab vs. placebo</b> |             |             |                      |                      |      |                  |                     |                    |                                                                |                          |                                                                |
| 197 (1 RCT)                                                               | not serious | not serious | serious <sup>a</sup> | not serious          | none | ⊕⊕⊕○<br>MODERATE | 102                 | 95                 | -                                                              | -                        | <b>MD 0.7 lower</b><br>(1.37 lower to 0.03 lower)              |
| <b>Enthesitis score (Leeds Enthesitis Index) – Brodalumab vs. placebo</b> |             |             |                      |                      |      |                  |                     |                    |                                                                |                          |                                                                |
| 112 (1 RCT)                                                               | not serious | not serious | serious <sup>a</sup> | serious <sup>b</sup> | none | ⊕⊕○○<br>LOW      | 55                  | 57                 | -                                                              | -                        | <b>MD 0.1 lower</b><br>(1.06 lower to 0.86 higher)             |
| <b>Enthesitis (MASES) score &gt;1 – Ustekinumab vs. placebo</b>           |             |             |                      |                      |      |                  |                     |                    |                                                                |                          |                                                                |
| 633<br>(2 RCTs)                                                           | not serious | not serious | serious <sup>a</sup> | not serious          | none | ⊕⊕⊕○<br>MODERATE | 171/205<br>(83.4%)  | 288/428<br>(67.3%) | <b>RR 0.81</b><br>(0.74 to 0.88)<br><br><b>Favors IL12/23i</b> | 834 per 1,000<br>(0.834) | <b>158 fewer per 1,000 (0.158)</b><br>(217 fewer to 100 fewer) |

**Table 2. IL12/23i or IL17i compared to placebo in patients with enthesitis despite OSM**

Bibliography: PICO 54: IL12/23i compared to IL17i for patients with active PsA and enthesitis despite OSM

| Quality assessment                                 |             |             |                      |                      |      | Summary of findings                                                                             |                 |                  |                                                       |                         |                                                         |
|----------------------------------------------------|-------------|-------------|----------------------|----------------------|------|-------------------------------------------------------------------------------------------------|-----------------|------------------|-------------------------------------------------------|-------------------------|---------------------------------------------------------|
| <b>Serious infection – IL17i vs. placebo</b>       |             |             |                      |                      |      |                                                                                                 |                 |                  |                                                       |                         |                                                         |
| 1189<br>(3 RCTs)                                   | not serious | not serious | serious <sup>a</sup> | serious <sup>b</sup> | none | <br>LOW      | 5/406<br>(1.2%) | 18/685<br>(2.6%) | <b>RR 1.79</b><br>(0.75 to 4.30)                      | 12 per 1,000<br>(0.012) | <b>9 more per 1,000 (0.009)</b><br>(3 fewer to 52 more) |
| <b>Serious infection – Ustekinumab vs. placebo</b> |             |             |                      |                      |      |                                                                                                 |                 |                  |                                                       |                         |                                                         |
| 925<br>(2 RCTs)                                    | not serious | serious     | serious <sup>a</sup> | not serious          | none | <br>MODERATE | 2/309<br>(0.6%) | 4/616<br>(0.6%)  | <b>RR 0.84</b><br>(0.20 to 3.50)<br><br>No difference | 6 per 1,000<br>(0.006)  | <b>1 fewer per 1,000</b><br>(5 fewer to 15 more)        |

CI: Confidence interval; RR: Risk ratio

a. Indirect comparison to placebo

b. Wide 95% CI that crosses line of no effect

Working Group quality of evidence categories:

**High quality: We are very confident that the true effect lies close to that of the estimate of the effect**

**Moderate quality: We are moderately confident in the effect estimate: The true effect is likely to be close to the estimate of the effect, but there is a possibility that it is substantially different**

**Low quality: Our confidence in the effect estimate is limited: The true effect may be substantially different from the estimate of the effect**

**Very low quality: We have very little confidence in the effect estimate: The true effect is likely to be substantially different from the estimate of effect**

#### References:

1. McInnes IB, Kavanaugh A, Gottlieb AB, Puig L, Rahman P, Ritchlin C, et al. Efficacy and safety of ustekinumab in patients with active psoriatic arthritis: 1 year results of the phase 3, multicentre, double-blind, placebo-controlled PSUMMIT 1 trial. *Lancet*. 2013;382(9894):780-789.

2. McInnes IB, Mease PJ, Kirkham B, Kavanaugh A, Ritchlin CT, Rahman P, et al. Secukinumab, a human anti-interleukin-17A monoclonal antibody, in patients with psoriatic arthritis (FUTURE 2): a randomised, double-blind, placebo-controlled, phase 3 trial. *Lancet*. 2015;386(9999):1137-1146.
3. Mease PJ, McInnes IB, Kirkham B, Kavanaugh A, Rahman P, van der Heijde D, et al. Secukinumab Inhibition of Interleukin-17A in Patients with Psoriatic Arthritis. *N Engl J Med*. 2015;373(14):1329-1339.
4. Gottlieb A, Menter A, Mendelsohn A, Shen YK, Li S, Guzzo C, et al. Ustekinumab, a human interleukin 12/23 monoclonal antibody, for psoriatic arthritis: randomised, double-blind, placebo-controlled, crossover trial. *Lancet*. 2009;373(9664):633-640.
5. Mease PJ, van der Heijde D, Ritchlin CT, Okada M, Cuchacovich RS, Shuler CL, et al. Ixekizumab, an interleukin-17A specific monoclonal antibody, for the treatment of biologic-naive patients with active psoriatic arthritis: results from the 24-week randomised, double-blind, placebo-controlled and active (adalimumab)-controlled period of the phase III trial SPIRIT-P1. *Ann Rheum Dis*. 2017;76(1):79-87.
6. Mease PJ, Genovese MC, Greenwald MW, Ritchlin CT, Beaulieu AD, Deodhar A, et al. Brodalumab, an anti-IL17RA monoclonal antibody, in psoriatic arthritis. *N Engl J Med*. 2014;370(24):2295-2306.
7. Ritchlin C, Rahman P, Kavanaugh A, McInnes IB, Puig L, Li S, et al. Efficacy and safety of the anti-IL-12/23 p40 monoclonal antibody, ustekinumab, in patients with active psoriatic arthritis despite conventional non-biological and biological anti-tumour necrosis factor therapy: 6-month and 1-year results of the phase 3, multicentre, double-blind, placebo-controlled, randomised PSUMMIT 2 trial. *Ann Rheum Dis*. 2014;73(6):990-999.

**PICO 55. In adult patients with active PsA and predominant enthesitis despite treatment with NSAIDs, what are the benefits and harms of switching to tofacitinib compared to switching to OSM?**

Summary: The literature searches did not identify any studies that addressed this PICO question.

Quality of evidence across all critical outcomes: Very low



## Special Populations

**PICO 56: In patients with active PsA, what are the benefits and harms of vaccination with killed vaccines prior to starting biologic compared to vaccination while using a biologic?**

Summary: Only one study directly addressed this PICO question[1] This was an RCT comparing the antibody response of patients with PsA randomized to etanercept or placebo and subsequently vaccinated with a 23-valent pneumococcal vaccine. Table 1 shows that the percentage of patients with 2-fold or 4-fold increase in antibody titers to five different antigens did not differ significantly between groups, but the 95% CIs showed serious imprecision in all effect estimates.

Adverse events were indirectly addressed by six studies evaluating vaccination safety in patients (mostly with rheumatoid arthritis) treated with TNFi.[2-7] All of the studies evaluated adverse events and serious adverse events in patients vaccinated during treatment with TNFi or Placebo. No significant difference was found in all studies between TNFi and Placebo patients. In one study, even though there were no cases reported in the category of tuberculosis (TB) in either group during the RCT, 2 cases (0.9%) were reported during the open-label extension (OLE) after CZP treatment, among which one was considered related to study drug by the investigator. In the same study, serious adverse events occurred at a rate of 1.8% in the CZP group during the RCT period, and in 6.8% of CZP-treated patients overall (combined RCT and OLE), which might be attributable to both longer duration and the OLE period. In another study, the rate of infectious adverse events was statistically significantly higher in the placebo treatment group [23.5% (27/115)] versus the adalimumab group [12.6% (14/111)] (p = 0.039).

Quality of evidence across all critical outcomes: Low

| <b>Table 1. Antibody Response in Patients Who Received Etanercept or Placebo Prior to Vaccination with Pneumococcal Vaccine</b><br>Bibliography: Etanercept versus Placebo for PV vaccinated patients. |              |               |              |             |                  |                             |                       |          |                          |                              |                          |
|--------------------------------------------------------------------------------------------------------------------------------------------------------------------------------------------------------|--------------|---------------|--------------|-------------|------------------|-----------------------------|-----------------------|----------|--------------------------|------------------------------|--------------------------|
| Quality assessment                                                                                                                                                                                     |              |               |              |             |                  |                             | Summary of findings   |          |                          |                              |                          |
| Nº of participants (studies)<br>Follow-up                                                                                                                                                              | Risk of bias | Inconsistency | Indirectness | Imprecision | Publication bias | Overall quality of evidence | Study event rates (%) |          | Relative effect (95% CI) | Anticipated absolute effects |                          |
|                                                                                                                                                                                                        |              |               |              |             |                  |                             | With Placebo          | With ETN |                          | Risk with Placebo            | Risk difference with ETN |
| <b>2-fold increase in titer 9V</b>                                                                                                                                                                     |              |               |              |             |                  |                             |                       |          |                          |                              |                          |

**Table 1. Antibody Response in Patients Who Received Etanercept or Placebo Prior to Vaccination with Pneumococcal Vaccine**

Bibliography: Etanercept versus Placebo for PV vaccinated patients.

| Quality assessment                  |             |             |                      |                      |      |             | Summary of findings |                  |                                  |               |                                                     |
|-------------------------------------|-------------|-------------|----------------------|----------------------|------|-------------|---------------------|------------------|----------------------------------|---------------|-----------------------------------------------------|
| 184<br>(1 RCT)                      | not serious | not serious | serious <sup>a</sup> | serious <sup>b</sup> | none | ⊕⊕○○<br>LOW | 53/90<br>(58.9%)    | 47/94<br>(50.0%) | <b>OR 0.70</b><br>(0.39 to 1.25) | 589 per 1,000 | <b>88 fewer per 1,000</b><br>(230 fewer to 53 more) |
| <b>2-fold increase in titer 14</b>  |             |             |                      |                      |      |             |                     |                  |                                  |               |                                                     |
| 184<br>(1 RCT)                      | not serious | not serious | serious <sup>a</sup> | serious <sup>b</sup> | none | ⊕⊕○○<br>LOW | 50/90<br>(55.6%)    | 55/94<br>(58.5%) | <b>OR 1.13</b><br>(0.63 to 2.02) | 556 per 1,000 | <b>30 more per 1,000</b><br>(115 fewer to 161 more) |
| <b>2-fold increase in titer 18C</b> |             |             |                      |                      |      |             |                     |                  |                                  |               |                                                     |
| 184<br>(1 RCT)                      | not serious | not serious | serious <sup>a</sup> | serious <sup>b</sup> | none | ⊕⊕○○<br>LOW | 56/90<br>(62.2%)    | 58/94<br>(61.7%) | <b>OR 0.98</b><br>(0.54 to 1.77) | 622 per 1,000 | <b>5 fewer per 1,000</b><br>(151 fewer to 122 more) |
| <b>2-fold increase in titer 19F</b> |             |             |                      |                      |      |             |                     |                  |                                  |               |                                                     |
| 184<br>(1 RCT)                      | not serious | not serious | serious <sup>a</sup> | serious <sup>b</sup> | none | ⊕⊕○○<br>LOW | 36/90<br>(40.0%)    | 33/94<br>(35.1%) | <b>OR 0.81</b><br>(0.45 to 1.48) | 400 per 1,000 | <b>49 fewer per 1,000</b><br>(169 fewer to 97 more) |
| <b>2-fold increase in titer 23F</b> |             |             |                      |                      |      |             |                     |                  |                                  |               |                                                     |

**Table 1. Antibody Response in Patients Who Received Etanercept or Placebo Prior to Vaccination with Pneumococcal Vaccine**

Bibliography: Etanercept versus Placebo for PV vaccinated patients.

| Quality assessment                  |             |             |                      |                      |      |             | Summary of findings |                  |                                  |               |                                                      |
|-------------------------------------|-------------|-------------|----------------------|----------------------|------|-------------|---------------------|------------------|----------------------------------|---------------|------------------------------------------------------|
| 184<br>(1 RCT)                      | not serious | not serious | serious <sup>a</sup> | serious <sup>b</sup> | none | ⊕⊕○○<br>LOW | 52/90<br>(57.8%)    | 48/94<br>(51.1%) | <b>OR 0.76</b><br>(0.43 to 1.36) | 578 per 1,000 | <b>68 fewer per 1,000</b><br>(207 fewer to 73 more)  |
| <b>4-fold increase of titer 9V</b>  |             |             |                      |                      |      |             |                     |                  |                                  |               |                                                      |
| 184<br>(1 RCT)                      | not serious | not serious | serious <sup>a</sup> | serious <sup>b</sup> | none | ⊕⊕○○<br>LOW | 41/90<br>(45.6%)    | 32/94<br>(34.0%) | <b>OR 0.62</b><br>(0.34 to 1.12) | 456 per 1,000 | <b>114 fewer per 1,000</b><br>(234 fewer to 28 more) |
| <b>4-fold increase in titer 14</b>  |             |             |                      |                      |      |             |                     |                  |                                  |               |                                                      |
| 184<br>(1 RCT)                      | not serious | not serious | serious <sup>a</sup> | serious <sup>b</sup> | none | ⊕⊕○○<br>LOW | 41/90<br>(45.6%)    | 40/94<br>(42.6%) | <b>OR 0.89</b><br>(0.49 to 1.59) | 456 per 1,000 | <b>29 fewer per 1,000</b><br>(165 fewer to 115 more) |
| <b>4-fold increase in titer 18C</b> |             |             |                      |                      |      |             |                     |                  |                                  |               |                                                      |
| 184<br>(1 RCT)                      | not serious | not serious | serious <sup>a</sup> | serious <sup>b</sup> | none | ⊕⊕○○<br>LOW | 42/90<br>(46.7%)    | 38/94<br>(40.4%) | <b>OR 0.78</b><br>(0.43 to 1.39) | 467 per 1,000 | <b>61 fewer per 1,000</b><br>(193 fewer to 82 more)  |
| <b>4-fold increase in titer 19F</b> |             |             |                      |                      |      |             |                     |                  |                                  |               |                                                      |

**Table 1. Antibody Response in Patients Who Received Etanercept or Placebo Prior to Vaccination with Pneumococcal Vaccine**

**Bibliography: Etanercept versus Placebo for PV vaccinated patients.**

| Quality assessment                  |             |             |                      |                      |      |             | Summary of findings |                  |                                  |               |                                                      |
|-------------------------------------|-------------|-------------|----------------------|----------------------|------|-------------|---------------------|------------------|----------------------------------|---------------|------------------------------------------------------|
| 184<br>(1 RCT)                      | not serious | not serious | serious <sup>a</sup> | serious <sup>b</sup> | none | ⊕⊕○○<br>LOW | 20/90<br>(22.2%)    | 18/94<br>(19.1%) | <b>OR 0.83</b><br>(0.41 to 1.69) | 222 per 1,000 | <b>31 fewer per 1,000</b><br>(117 fewer to 103 more) |
| <b>4-fold increase in titer 23F</b> |             |             |                      |                      |      |             |                     |                  |                                  |               |                                                      |
| 184<br>(1 RCT)                      | not serious | not serious | serious <sup>a</sup> | serious <sup>b</sup> | none | ⊕⊕○○<br>LOW | 31/90<br>(34.4%)    | 25/94<br>(26.6%) | <b>OR 0.69</b><br>(0.37 to 1.30) | 344 per 1,000 | <b>78 fewer per 1,000</b><br>(182 fewer to 61 more)  |

CI: Confidence interval; OR: Odds ratio

**Explanations**

- a. Outcomes not direct and only a single vaccine is used, which may not be representative of the immune response to other vaccines
- b. Wide CI crossing significant effect and no-effect lines

| Author, year   | Study type                                        | Duration | Population Description | Treatment given to relevant population                                                                                 | Results                                                                                                                                                                                                |
|----------------|---------------------------------------------------|----------|------------------------|------------------------------------------------------------------------------------------------------------------------|--------------------------------------------------------------------------------------------------------------------------------------------------------------------------------------------------------|
| Ribeiro, 2013  | Cohort study                                      | 21 days  | 99 Patients with RA    | Influenza A/H1N1 killed virus vaccine given to 11 pts with Abatacept (RA-ABA), 33 MTX (RA-MTX) and 55 healthy controls | The rates of minor side effects were comparable: 55% in RA-ABA patients, 39% in RA-MTX patients, and 40% in control groups (P=0.64). Severe side effects were not reported during the followup period. |
| Migita, 2015   | Randomized, double-blind placebo-controlled study | 6 weeks  | 703 patients with RA   | PPSV23 administered to 353 patients on MTX, ABA, other biologics, or controls                                          | There were no reported adverse events associated with PPSV23 vaccination.                                                                                                                              |
| Kivitz A, 2014 | Single-blind Randomized placebo-controlled        | 6-week   | 224 patients with RA   | Pneumococcal (polysaccharide 23) and influenza vaccines administered at Week 2 to 110 patients with CZP and 114 with   | AE occurred 62.3% in placebo and 63.6% CZP groups. Serious AE occurred in 1 patient (0.9%) in the placebo group, and in 2 patients (1.8%) in the CZP group. Serious AE occurred in 6.8% of             |

| Author, year    | Study type                     | Duration     | Population Description                                 | Treatment given to relevant population                                                                                                                                                                                                                                                          | Results                                                                                                                                                                                                                                                                                                                                                                                                                                                                                                                                                                                                                                                                                                                                                                                                                                                                |
|-----------------|--------------------------------|--------------|--------------------------------------------------------|-------------------------------------------------------------------------------------------------------------------------------------------------------------------------------------------------------------------------------------------------------------------------------------------------|------------------------------------------------------------------------------------------------------------------------------------------------------------------------------------------------------------------------------------------------------------------------------------------------------------------------------------------------------------------------------------------------------------------------------------------------------------------------------------------------------------------------------------------------------------------------------------------------------------------------------------------------------------------------------------------------------------------------------------------------------------------------------------------------------------------------------------------------------------------------|
|                 | trial                          |              |                                                        | Placebo                                                                                                                                                                                                                                                                                         | CZP-treated patients overall (combined RCT and OLE). Even though there were no cases reported in the category of tuberculosis (TB) in either group during the RCT, 2 cases (0.9%) were reported during the OLE after CZP treatment, among which one was considered related to study drug by the investigator                                                                                                                                                                                                                                                                                                                                                                                                                                                                                                                                                           |
| Franca I, 2012  | Cohort study                   | 21 days      | 236 pts with RA, SpA and PsA, and 117 healthy controls | anti-influenza A H1N1/2009 vaccine administered to 120 pts on anti-TNF agents, 116 inflammatory arthritis patients on DMARDs, and 117 healthy controls.                                                                                                                                         | Only mild systemic reactions were more often observed in patients on anti-TNF compared with healthy controls: fever (8.3% vs 0.9%, P = 0.01), arthralgia (12.5% vs 4.3%, P = 0.03), and nasal congestion (13.3% vs 4.3%, P = 0.014). No severe adverse event was reported in any group.                                                                                                                                                                                                                                                                                                                                                                                                                                                                                                                                                                                |
| Elkayam O, 2008 | Cohort study                   | 4 to 6 weeks | 43 RA patients and 18 AS patients                      | Split-virion inactivated vaccine containing 15g hemagglutinin/dose of each of A/New Caledonian/20/1999 (H1N1), A/Wisconsin/67/2005 (H3N2), and B/Malaysia/2506/2004 (M) was given to 22 pts on the day of administration of infliximab, while 16 received the vaccine 3 weeks after infliximab. | No adverse effects other than injection site pain were recorded.                                                                                                                                                                                                                                                                                                                                                                                                                                                                                                                                                                                                                                                                                                                                                                                                       |
| Kaine J, 2007   | Double-blind, randomized trial | 4 weeks      | 208 adult patients with RA                             | Pneumococcal and influenza vaccines were administered on Day 8 to patients who received adalimumab (99) or placebo (109).                                                                                                                                                                       | During the blinded period of the study no deaths were reported, and one patient receiving placebo reported a serious AE. A slightly greater percentage of patients in the placebo group reported an AE than did patients in the adalimumab group [54.8% (63/115) vs 45.9% (51/111), respectively]. The most frequently reported treatment-emergent AE occurring during the blinded period of the study were upper respiratory tract infection and injection site reaction; both were reported more frequently by placebo-treated patients. There were no serious infectious AE, malignancies, or opportunistic infections, including tuberculosis, reported during the double-blind period. The rate of infectious AE was statistically significantly higher in the placebo treatment group [23.5% (27/115)] versus the adalimumab group [12.6% (14/111)] (p = 0.039). |

## References

1. Mease PJ, Ritchlin CT, Martin RW, Gottlieb AB, Baumgartner SW, Burge DJ, Whitmore JB. Pneumococcal vaccine response in psoriatic arthritis patients during treatment with etanercept. *J Rheumatol.* 2004 Jul;31(7):1356-61.

2. Kivitz AJ, Schechtman J, Texter M, Fichtner A, de Longueville M, Chartash EK. Vaccine responses in patients with rheumatoid arthritis treated with certolizumab pegol: results from a single-blind randomized phase IV trial. *J Rheumatol*. 2014;41(4):648-657.
3. Franca IL, Ribeiro AC, Aikawa NE, Saad CG, Moraes JC, Goldstein-Schainberg C, et al. TNF blockers show distinct patterns of immune response to the pandemic influenza A H1N1 vaccine in inflammatory arthritis patients. *Rheumatology (Oxford)*. 2012;51(11):2091-2098.
4. Elkayam O, Bashkin A, Mandelboim M, Litinsky I, Comaheshter D, Levartovsky D, et al. The effect of infliximab and timing of vaccination on the humoral response to influenza vaccination in patients with rheumatoid arthritis and ankylosing spondylitis. *Semin Arthritis Rheum*. 2010;39(6):442-447.
5. Kaine JL, Kivitz AJ, Birbara C, Luo AY. Immune responses following administration of influenza and pneumococcal vaccines to patients with rheumatoid arthritis receiving adalimumab. *J Rheumatol*. 2007;34(2):272-279.
6. Ribeiro AC, Laurindo IM, Guedes LK, Saad CG, Moraes JC, Silva CA, et al. Abatacept and reduced immune response to pandemic 2009 influenza A/H1N1 vaccination in patients with rheumatoid arthritis. *Arthritis Care Res (Hoboken)*. 2013;65(3):476-480.
7. Migita K, Akeda Y, Akazawa M, Tohma S, Hirano F, Ideguchi H, et al. Effect of abatacept on the immunogenicity of 23-valent pneumococcal polysaccharide vaccination (PPSV23) in rheumatoid arthritis patients. *Arthritis Res Ther*. 2015;17:357.

**PICO 57. In patients with active PsA, what are the benefits and harms of vaccination with live attenuated vaccines prior to starting biologic compared to vaccination while using a biologic?**

Summary: The literature searches identified one large retrospective cohort study of patients with immune-mediated diseases who received the Herpes Zoster vaccine that addressed this PICO question.[1] As a retrospective observational study the GRADE rating started at low; since only 3% of patients had PsA (the rest had psoriasis, ankylosing spondylitis, rheumatoid arthritis, and inflammatory bowel disease); the rating was further downgraded to very low due to indirectness of the patient population. The Herpes Zoster incidence rate was similar in patients who received biologics and patients who did not receive biologics (see table below).

Quality of evidence across all critical outcomes: Very low

| Author, year               | Study type                 | Duration       | Population Description                                                                               | Treatment given to relevant population                                                                | Results                                                              |          |                   |
|----------------------------|----------------------------|----------------|------------------------------------------------------------------------------------------------------|-------------------------------------------------------------------------------------------------------|----------------------------------------------------------------------|----------|-------------------|
|                            |                            |                |                                                                                                      |                                                                                                       |                                                                      | HZ cases | HZ incidence rate |
| Zhang et al. 2012          | Retrospective cohort study | 2 years        | 463,541 patients over 60 with RA, psoriasis, psoriatic arthritis, ankylosing spondylitis, and/or IBD | Herpes Zoster vaccine given to pts with TNFi and non-TNFi biologics, DMARDs, and oral glucocorticoids |                                                                      |          |                   |
|                            |                            |                |                                                                                                      |                                                                                                       | Overall Medications (mutually exclusive groups):                     | 138      | 6.7 (5.7-7.9)     |
|                            |                            |                |                                                                                                      |                                                                                                       | Biologics (regardless of concomitant DMARDs or oral glucocorticoids) | 14       | 8.5(5.1-14.4)     |
|                            |                            |                |                                                                                                      |                                                                                                       | Anti-TNF therapies                                                   | 12       | 8.5(4.8-15.0)     |
|                            |                            |                |                                                                                                      |                                                                                                       | DMARDs (without biologics but regardless of oral glucocorticoids)    | 25       | 7.0(4.7-10.3)     |
| Oral glucocorticoids alone | 21                         | 10.3(6.7-15.8) |                                                                                                      |                                                                                                       |                                                                      |          |                   |

**References**

1. Zhang J, Xie F, Delzell E, Chen L, Winthrop K, Lewis JD, et al.. Association between Vaccination for Herpes Zoster and Risk of Herpes Zoster Infection among Older Patients with Selected Immune-mediated Diseases. JAMA. 2012 July 4; 308(1): 43–49.

## Comorbidities

**PICO 58. In adult patients with active PsA and IBD despite treatment with an OSM, what are the benefits and harms of switching to TNFi (monoclonal antibodies [MABs]) vs. switching to TNFi soluble receptor biologic (i.e. etanercept)?**

Summary: The literature searches did not identify any direct studies that addressed this PICO question. Two systematic reviews compared TNFi (monoclonal antibodies [MABs]) to placebo, one in Crohn's Disease patients,[1] and another in Ulcerative Colitis patients.[2] One RCT compared etanercept with Placebo in patients with Crohn's Disease.[3] The systematic reviews revealed that anti-TNF MABs result in a 1.66-fold higher likelihood of induction of remission (95% CI: 1.17–2.36) and 1.43-fold higher likelihood of induction of response (95% CI: 1.17–1.73) compared to placebo in patients with Crohn's Disease. For patients with ulcerative colitis, meta-analyses found a 2.45-fold higher likelihood of induction of remission and 1.65-fold higher likelihood of induction of response compared to placebo (RR: 2.45, 95% CI: 1.72–3.47 and RR: 1.65, 95% CI: 1.37–1.99 respectively). In the RCT the rates of clinical response at week 2, 4 and 8 were similar in patients treated with etanercept compared with placebo, RR=1.91 (0.8-4.75), 0.87 (0.43-1.76), and 1.01 (0.41-2.52) respectively.

Quality of evidence across all critical outcomes: Moderate





## TNFi (MAB) compared to Placebo for Crohn's disease

Bibliography: TNFi (MAB) compared to Placebo for Crohn's disease

| Quality assessment                        |              |               |                      |             |                  |                             | Summary of findings   |                    |                                  |                              |                                                    |
|-------------------------------------------|--------------|---------------|----------------------|-------------|------------------|-----------------------------|-----------------------|--------------------|----------------------------------|------------------------------|----------------------------------------------------|
| No of participants (studies)<br>Follow-up | Risk of bias | Inconsistency | Indirectness         | Imprecision | Publication bias | Overall quality of evidence | Study event rates (%) |                    | Relative effect (95% CI)         | Anticipated absolute effects |                                                    |
|                                           |              |               |                      |             |                  |                             | With Placebo          | With TNFi (MAB)    |                                  | Risk with Placebo            | Risk difference with TNFi (MAB)                    |
| <b>Induction of remission endpoint</b>    |              |               |                      |             |                  |                             |                       |                    |                                  |                              |                                                    |
| 1771<br>(6 RCTs)                          | not serious  | not serious   | serious <sup>a</sup> | not serious | none             | ⊕⊕⊕○<br>MODERATE            | 150/882<br>(17.0%)    | 227/889<br>(25.5%) | <b>RR 1.66</b><br>(1.17 to 2.36) | 170 per 1,000                | <b>112 more per 1,000</b><br>(29 more to 231 more) |
| <b>Induction of response endpoint</b>     |              |               |                      |             |                  |                             |                       |                    |                                  |                              |                                                    |
| 1771<br>(6 RCTs)                          | not serious  | not serious   | serious <sup>a</sup> | not serious | none             | ⊕⊕⊕○<br>MODERATE            | 246/882<br>(27.9%)    | 346/889<br>(38.9%) | <b>RR 1.43</b><br>(1.17 to 1.73) | 279 per 1,000                | <b>120 more per 1,000</b><br>(47 more to 204 more) |
| <b>Maintenance of remission endpoint</b>  |              |               |                      |             |                  |                             |                       |                    |                                  |                              |                                                    |
| 1690<br>(5 RCTs)                          | not serious  | not serious   | serious <sup>a</sup> | not serious | none             | ⊕⊕⊕○<br>MODERATE            | 153/839<br>(18.2%)    | 278/851<br>(32.7%) | <b>RR 1.78</b><br>(1.51 to 2.09) | 182 per 1,000                | <b>142 more per 1,000</b><br>(93 more to 199 more) |
| <b>Maintenance of response endpoint</b>   |              |               |                      |             |                  |                             |                       |                    |                                  |                              |                                                    |

|                  |             |             |                      |             |      |                  |                    |                    |                                  |               |                                                     |
|------------------|-------------|-------------|----------------------|-------------|------|------------------|--------------------|--------------------|----------------------------------|---------------|-----------------------------------------------------|
| 1467<br>(4 RCTs) | not serious | not serious | serious <sup>a</sup> | not serious | none | ⊕⊕⊕○<br>MODERATE | 184/729<br>(25.2%) | 315/738<br>(42.7%) | <b>RR 1.68</b><br>(1.46 to 1.93) | 252 per 1,000 | <b>172 more per 1,000</b><br>(116 more to 235 more) |
|------------------|-------------|-------------|----------------------|-------------|------|------------------|--------------------|--------------------|----------------------------------|---------------|-----------------------------------------------------|

CI: Confidence interval; RR: Risk ratio

### Explanations

a. Indirect comparison to placebo

| <b>TNFi (MAB) compared to Placebo for Ulcerative colitis</b>        |              |               |                      |             |                  |                             |                       |                    |                                  |                              |                                                     |
|---------------------------------------------------------------------|--------------|---------------|----------------------|-------------|------------------|-----------------------------|-----------------------|--------------------|----------------------------------|------------------------------|-----------------------------------------------------|
| Bibliography: TNFi (MAB) compared to Placebo for Ulcerative colitis |              |               |                      |             |                  |                             |                       |                    |                                  |                              |                                                     |
| Quality assessment                                                  |              |               |                      |             |                  |                             | Summary of findings   |                    |                                  |                              |                                                     |
| No of participants (studies)<br>Follow-up                           | Risk of bias | Inconsistency | Indirectness         | Imprecision | Publication bias | Overall quality of evidence | Study event rates (%) |                    | Relative effect (95% CI)         | Anticipated absolute effects |                                                     |
|                                                                     |              |               |                      |             |                  |                             | With Placebo          | With TNFi (MAB)    |                                  | Risk with Placebo            | Risk difference with TNFi (MAB)                     |
| <b>Induction of remission endpoints</b>                             |              |               |                      |             |                  |                             |                       |                    |                                  |                              |                                                     |
| 1823<br>(6 RCTs)                                                    | not serious  | not serious   | serious <sup>a</sup> | not serious | none             | ⊕⊕⊕○<br>MODERATE            | 82/912<br>(9.0%)      | 210/911<br>(23.1%) | <b>RR 2.45</b><br>(1.72 to 3.47) | 90 per 1,000                 | <b>130 more per 1,000</b><br>(65 more to 222 more)  |
| <b>Induction of response endpoint</b>                               |              |               |                      |             |                  |                             |                       |                    |                                  |                              |                                                     |
| 1780<br>(5 RCTs)                                                    | not serious  | not serious   | serious <sup>a</sup> | not serious | none             | ⊕⊕⊕○<br>MODERATE            | 300/892<br>(33.6%)    | 491/888<br>(55.3%) | <b>RR 1.65</b><br>(1.37 to 1.99) | 336 per 1,000                | <b>219 more per 1,000</b><br>(124 more to 333 more) |

## TNFi (MAB) compared to Placebo for Ulcerative colitis

Bibliography: TNFi (MAB) compared to Placebo for Ulcerative colitis

| Quality assessment                       |             |             |                      |             |      | Summary of findings |                    |                    |                                  |               |                                                     |
|------------------------------------------|-------------|-------------|----------------------|-------------|------|---------------------|--------------------|--------------------|----------------------------------|---------------|-----------------------------------------------------|
| <b>Maintenance of remission endpoint</b> |             |             |                      |             |      |                     |                    |                    |                                  |               |                                                     |
| 1070<br>(3 RCTs)                         | not serious | not serious | serious <sup>a</sup> | not serious | none | ⊕⊕⊕○<br>MODERATE    | 65/537<br>(12.1%)  | 129/533<br>(24.2%) | <b>RR 2.00</b><br>(1.52 to 2.62) | 121 per 1,000 | <b>121 more per 1,000</b><br>(63 more to 196 more)  |
| <b>Maintenance of response endpoint</b>  |             |             |                      |             |      |                     |                    |                    |                                  |               |                                                     |
| 1070<br>(3 RCTs)                         | not serious | not serious | serious <sup>a</sup> | not serious | none | ⊕⊕⊕○<br>MODERATE    | 118/537<br>(22.0%) | 208/533<br>(39.0%) | <b>RR 1.76</b><br>(1.46 to 2.14) | 220 per 1,000 | <b>167 more per 1,000</b><br>(101 more to 251 more) |

CI: Confidence interval; RR: Risk ratio

### Explanations

a. Indirect comparison to placebo

## Etanercept compared to Placebo for Crohn's Disease

Bibliography: Etanercept compared to Placebo for Crohn's Disease

| Quality assessment                        |              |               |              |             |                  |                             | Summary of findings   |                 |                          |                              |                                 |
|-------------------------------------------|--------------|---------------|--------------|-------------|------------------|-----------------------------|-----------------------|-----------------|--------------------------|------------------------------|---------------------------------|
| No of participants (studies)<br>Follow-up | Risk of bias | Inconsistency | Indirectness | Imprecision | Publication bias | Overall quality of evidence | Study event rates (%) |                 | Relative effect (95% CI) | Anticipated absolute effects |                                 |
|                                           |              |               |              |             |                  |                             | With Placebo          | With Etanercept |                          | Risk with Placebo            | Risk difference with Etanercept |
|                                           |              |               |              |             |                  |                             |                       |                 |                          |                              |                                 |

## Etanercept compared to Placebo for Crohn's Disease

Bibliography: Etanercept compared to Placebo for Crohn's Disease

| Quality assessment                                           |             |             |                      |                      |      | Summary of findings |                 |                  |                                  |               |                                               |
|--------------------------------------------------------------|-------------|-------------|----------------------|----------------------|------|---------------------|-----------------|------------------|----------------------------------|---------------|-----------------------------------------------|
| <b>Clinical Response at 4 weeks (Primary Study Endpoint)</b> |             |             |                      |                      |      |                     |                 |                  |                                  |               |                                               |
| 43<br>(1 RCT)                                                | not serious | not serious | serious <sup>a</sup> | serious <sup>b</sup> | none | ⊕⊕○○<br>LOW         | 9/20<br>(45.0%) | 9/23<br>(39.1%)  | <b>RR 0.87</b><br>(0.43 to 1.76) | 450 per 1,000 | 59 fewer per 1,000<br>(257 fewer to 342 more) |
| <b>Clinical Response at 2 weeks</b>                          |             |             |                      |                      |      |                     |                 |                  |                                  |               |                                               |
| 43<br>(1 RCT)                                                | not serious | not serious | serious <sup>a</sup> | serious <sup>b</sup> | none | ⊕⊕○○<br>LOW         | 5/20<br>(25.0%) | 11/23<br>(47.8%) | <b>RR 1.91</b><br>(0.80 to 4.57) | 250 per 1,000 | 227 more per 1,000<br>(50 fewer to 893 more)  |
| <b>Clinical Response at 8 weeks</b>                          |             |             |                      |                      |      |                     |                 |                  |                                  |               |                                               |
| 43<br>(1 RCT)                                                | not serious | not serious | serious <sup>a</sup> | serious <sup>b</sup> | none | ⊕⊕○○<br>LOW         | 6/20<br>(30.0%) | 7/23<br>(30.4%)  | <b>RR 1.01</b><br>(0.41 to 2.52) | 300 per 1,000 | 3 more per 1,000<br>(177 fewer to 456 more)   |

**CI:** Confidence interval; **RR:** Risk ratio

### Explanations

a. Indirect comparison to placebo

b. C.I. crosses no effect line

### References

1. Stidham RW, Lee TC, Higgins PD, Deshpande AR, Sussman DA, Singal AG, et al.. Systematic review with network meta-analysis: the efficacy of anti-TNF agents for the treatment of Crohn's disease. *Aliment Pharmacol Ther.* 2014 Jun;39(12):1349-62.
2. Stidham RW, Lee TC, Higgins PD, Deshpande AR, Sussman DA, Singal AG, et al. Systematic review with network meta-analysis: the efficacy of anti-tumour necrosis factor-alpha agents for the treatment of ulcerative colitis. *Aliment Pharmacol Ther.* 2014 Apr;39(7):660-71.

- Sandborn WJ, Hanauer SB, Katz S, Safdi M, Wolf DG, Baerg RD, et al. Etanercept for active Crohn's disease: a randomized, double-blind, placebo-controlled trial. *Gastroenterology*. 2001 Nov;121(5):1088-94.

**PICO 59. In adult patients with active PsA and IBD despite treatment with an OSM, what are the benefits and harms of switching to TNFi (MABs) vs. switching to IL17i?**

Summary: The literature searches did not identify any studies that addressed this PICO question. However, IL17i was not approved for IBD based on evidence from an RCT of harms in this patient population (the trial was discontinued early due to excess harms and lack of efficacy in the secukinumab arm).[1] This resulted in a warning on the IL17i package insert regarding harms in this population.

Quality of evidence across all critical outcomes: Moderate

| Author, year | Study type | Duration                                                   | Population Description                              | Treatment given to relevant population                                      | Results                                                                                                                                                                                                                                                                                                                                                                                                                                                                                                                           |
|--------------|------------|------------------------------------------------------------|-----------------------------------------------------|-----------------------------------------------------------------------------|-----------------------------------------------------------------------------------------------------------------------------------------------------------------------------------------------------------------------------------------------------------------------------------------------------------------------------------------------------------------------------------------------------------------------------------------------------------------------------------------------------------------------------------|
| Hueber, 2012 | RCT        | 6 weeks, with follow-up of secondary endpoints to 10 weeks | 59 patients with moderate to severe Crohn's disease | Secukinumab (2X10 mg/kg intravenous, 39 patients) vs. placebo (20 patients) | Primary endpoint was change in Crohn's Disease Activity Index (CDAI) at 6 weeks. The difference between groups was not significant (change in CDAI score 33.9, 95% Bayesian credible interval -4.9 to 72.9), and area under the curve analysis at 4 to 10 weeks showed a significant difference (mean change in CDAI=49; 95% CI (2 to 96), p=0.043) favoring placebo.<br><br>Adverse events were more common in the secukinumab group (74% vs. 50%) and the infection rate was much higher in the secukinumab group (43% vs. 0%). |

**References**

- Hueber W, Sands BE, Lewitzky S, Vandemeulebroecke M, Reinisch W, Higgins PDR, et al. Secukinumab, a human anti-IL-17A monoclonal antibody, for moderate to severe Crohn's disease: unexpected results of a randomised, double-blind, placebo-controlled trial. *Gut* 2012;61:1693–1700.

**PICO 60. In adult patients with active PsA and IBD despite treatment with an OSM, what are the benefits and harms of switching to IL12/23i vs. switching to IL17i?**

Summary: The literature searches did not identify any studies that addressed this PICO question. However, IL12/23i is approved for IBD and IL17i was not approved for IBD based on evidence of harms in this patient population (see PICO 59). This resulted in a warning on the IL17i package insert regarding harms in this population.

Quality of evidence across all critical outcomes: Moderate

## References

1. Hueber W, Sands BE, Lewitzky S, Vandemeulebroecke M, Reinisch W, Higgins PDR, et al. Secukinumab, a human anti-IL-17A monoclonal antibody, for moderate to severe Crohn's disease: unexpected results of a randomised, double-blind, placebo-controlled trial. *Gut* 2012;61:1693–1700.

### **PICO 61. In adult patients with active PsA and IBD despite treatment with an OSM, what are the benefits and harms of switching to TNFi (MABs) vs. switching to IL12/23i?**

Summary: The literature searches did not identify any studies that addressed this PICO question.

Quality of evidence across all critical outcomes: Very low

### **PICO 62. In adult patients with active PsA and IBD who are both OSM and biologic treatment-naïve, what are the benefits and harms of starting OSMs vs. starting TNFi (MABs)?**

**Summary.** This PICO was addressed indirectly by one systematic review that included 3 RCTs. The studies looked at patients with acute ulcerative colitis naïve to OSM or biologics comparing treatment with infliximab vs. cyclosporine [1]. The only relevant outcome reported was serious adverse events, which showed no significant difference between treatment groups. However, the findings are inconclusive due to imprecision in the effect estimate.

Quality of evidence across all critical outcomes: Very low

| <b>Infliximab compared to Cyclosporine for PsA and IBD patients who are OSM and Biologic-naïve</b><br>Bibliography: PICO 62 - PsA and IBD patients who are OSM and Biologic naïve: OSM vs. TNFi. |                            |
|--------------------------------------------------------------------------------------------------------------------------------------------------------------------------------------------------|----------------------------|
| <b>Quality assessment</b>                                                                                                                                                                        | <b>Summary of findings</b> |

## Infliximab compared to Cyclosporine for PsA and IBD patients who are OSM and Biologic-naive

Bibliography: PICO 62 - PsA and IBD patients who are OSM and Biologic naive: OSM vs. TNFi.

| Quality assessment                        |                      |               |                           |                      |                  |                             | Summary of findings   |               |                                  |                              |                                                            |
|-------------------------------------------|----------------------|---------------|---------------------------|----------------------|------------------|-----------------------------|-----------------------|---------------|----------------------------------|------------------------------|------------------------------------------------------------|
| No of participants (studies)<br>Follow-up | Risk of bias         | Inconsistency | Indirectness              | Imprecision          | Publication bias | Overall quality of evidence | Study event rates (%) |               | Relative effect (95% CI)         | Anticipated absolute effects |                                                            |
|                                           |                      |               |                           |                      |                  |                             | With CYC              | With IFX      |                                  | Risk with CYC                | Risk difference with IFX                                   |
| <b>Serious Adverse Events</b>             |                      |               |                           |                      |                  |                             |                       |               |                                  |                              |                                                            |
| 415 (1 systematic review with 3 RCTs)     | serious <sup>a</sup> | not serious   | very serious <sup>b</sup> | serious <sup>c</sup> | none             | ⊕○○○<br>VERY LOW            | 14/206 (6.8%)         | 20/209 (9.6%) | <b>RR 1.41</b><br>(0.73 to 2.71) | 68 per 1,000 (0.068)         | <b>28 more per 1,000 (0.028)</b><br>(18 fewer to 116 more) |

**CI:** Confidence interval; **CYC:** Cyclosporine; **IFX:** Infliximab; **RR:** Risk ratio

a. No mention in the review of randomization, allocation concealment, or blinding

b. Entire patient population are those with acute UC

c. Wide CI that crosses no effect line

Working Group quality of evidence categories:

**High quality:** We are very confident that the true effect lies close to that of the estimate of the effect

**Moderate quality:** We are moderately confident in the effect estimate: The true effect is likely to be close to the estimate of the effect, but there is a possibility that it is substantially different

**Low quality:** Our confidence in the effect estimate is limited: The true effect may be substantially different from the estimate of the effect

**Very low quality:** We have very little confidence in the effect estimate: The true effect is likely to be substantially different from the estimate of effect

### References:

- Narula N, Marshall JK, Colombel JF, Leontiadis GI, Williams JG, Muqtadir Z, et al. Systematic Review and Meta-Analysis: Infliximab or Cyclosporine as Rescue Therapy in Patients With Severe Ulcerative Colitis Refractory to Steroids. Am J Gastroenterol. 2016;111(4):477-491.



**PICO 63. In adult patients with active PsA and diabetes who are both OSM and biologic treatment-naïve, what are the benefits and harms of starting OSM vs. starting TNFi?**

Summary: The literature searches did not identify any studies that directly addressed this PICO question. Two case series studies evaluated effects of diabetes on liver in patients with psoriasis on MTX treatment. One study [1] compared the impact of diabetes cumulatively with other risk factors such as obesity, alcohol consumption, chronic hepatitis B and C, while another study [2] studied impact of diabetes separately from other risk factors. Results show that diabetes has more impact on developing liver pathologies, such as fibrosis, in patients taking MTX at least 1000mg of cumulative dose.

Quality of evidence across all critical outcomes: Very low

| Author, year      | Study type  | Duration                         | Population Description                                                | Treatment given to relevant population  | Results                                                                                                                                                                                                                                                                                                                                                                                                                                                                                                                                                                                                                                                                                                                                                                                                                                                                            |
|-------------------|-------------|----------------------------------|-----------------------------------------------------------------------|-----------------------------------------|------------------------------------------------------------------------------------------------------------------------------------------------------------------------------------------------------------------------------------------------------------------------------------------------------------------------------------------------------------------------------------------------------------------------------------------------------------------------------------------------------------------------------------------------------------------------------------------------------------------------------------------------------------------------------------------------------------------------------------------------------------------------------------------------------------------------------------------------------------------------------------|
| Rosenberg, 2007   | Case series | Between 1975 and 2003            | 169 Patients with psoriasis and with/without diabetes mellitus type 2 | Median cumulative dose MTX 1500-2100 mg | 26 patients had one or more of the risk factors (diabetes mellitus type 2, overweight, alcohol over-consumption, and chronic hepatitis B or C) and 25 (96%) of these (median cumulative dose methotrexate 1500 mg) developed liver fibrosis. Of those without risk factor, 26 (58%) (p = 0.012) developed fibrosis (median cumulative dose methotrexate 2100 mg). Ten (38%) of the patients with risk factor(s) had severe fibrosis (stage 3–4) (mean cumulative dose methotrexate 1600 mg), while four (9%) (p = 0.0012) of those without risk factors had severe fibrosis (median cumulative dose methotrexate 1900 mg).<br><br>Seven (100%) of the patients with diabetes mellitus developed liver fibrosis compared to 37 (52%) of those without. Four (57%) of the seven patients with diabetes developed severe fibrosis compared to nine (14%) of those without (p = 0.003) |
| Malatjalian, 1996 | Case series | Mean treatment duration 3.38 yrs | 104 patients with psoriasis and diabetes                              | MTX cumulative dose 1000 to 1500 mg     | Progression of liver pathology to higher grade in patients with diabetes Odds Ratio 2.07 (0.35-12.35) p=0.42. Progression of liver pathology to grades IIIB and IV Odds Ratio 5.68 (1.34-24.39), p=0.02                                                                                                                                                                                                                                                                                                                                                                                                                                                                                                                                                                                                                                                                            |

**References:**

1. Rosenberg P et al. Psoriasis patients with diabetes type 2 are at high risk of developing liver fibrosis during methotrexate treatment. *Journal of Hepatology* 46 (2007) 1111–1118
2. Malatjalian D et al. Methotrexate hepatotoxicity in psoriatics: Report of 104 patients from Nova Scotia, with analysis of risks from obesity, diabetes and alcohol consumption during long term follow-up. *Can J Gastroenterol* 1996;10(6):369-375.

**PICO 64. In adult patients with active PsA and frequent serious infections who are both OSM and biologic treatment-naïve, what are the benefits and harms of starting OSMs vs. starting TNFi?**

Summary: The literature searches did not identify any studies that addressed this PICO question. However, evidence concerning serious infections appears in the evidence base of earlier questions. Although the serious infection rate in most RCTs was so low that the findings were always imprecise, there is a black box warning against the use of TNFi in patients with recurrent serious infections.

Quality of evidence across all critical outcomes: Moderate

**PICO 65. In adult patients with active PsA and frequent serious infections despite treatment with an OSM, what are the benefits and harms of switching to TNFi vs. switching to IL12/23i?**

Summary: The literature searches did not identify any studies that directly addressed this PICO question. However, evidence concerning serious infections appears in the evidence base of earlier questions. The serious infection rate in most RCTs was so low that the findings were always imprecise. However, there is indirect evidence from a large retrospective cohort study (Yun et al. 2016) using Medicare data from RA patients.[1] The final cohort had 31,801 new courses of biologic therapy. The study compared hospitalized infection rates associated with the following biologic therapies: adalimumab, certolizumab, etanercept, golimumab, infliximab, rituximab, tocilizumab, and abatacept. Since abatacept had the lowest crude incidence rate of hospitalized infection (13.1/100 patients-years) it was used as the reference comparison. Biologic therapies with significantly higher adjusted hazard ratios (HR) for hospitalized infection compared to abatacept include etanercept (adjusted HR 1.24, 95% CI 1.07-1.45), infliximab (adjusted HR 1.39, 95% CI 1.21-1.60), and rituximab (adjusted HR 1.36, 95% CI 1.21-1.53).[1]

Quality of evidence across all critical outcomes: Very low

References:

1. Yun H et al. Comparative risk of hospitalized infection associated with biologic agents in rheumatoid arthritis patients enrolled in Medicare. *Arth Rheumatol* 2016; 68:56-66.

**PICO 66. In adult patients with active PsA and frequent serious infections despite treatment with an OSM, what are the benefits and harms of switching to TNFi vs. switching to IL17i?**

Summary: The literature searches did not identify any studies that addressed this PICO question. However, evidence concerning serious infections appears in the evidence base of earlier questions. However, the serious infection rate in most RCTs was so low that the findings were always imprecise.

Quality of evidence across all critical outcomes: Very low

## Update: Additional PICO Questions

**PICO 67. In adult patients with active PsA despite treatment with an OSM, what are the benefits and harms of switching to a TNFi compared to switching to abatacept?**

Summary: Eleven placebo controlled RCTs (14 publications) indirectly addressed this PICO question. Nine studies (12 publications) compared TNFi versus placebo in PsA patients.[1-12] Two studies compared abatacept with placebo in PsA patients.[13,14] Statistically significant differences favoring TNFi over placebo were reported for all efficacy outcomes (ACR20, HAQ-DI, PASI-75, data not shown), while abatacept showed a significant benefit over placebo only for ACR20 (data not shown). No statistically significant differences with placebo occurred for any adverse events (see Table 2 for serious infections).

The adjusted indirect comparison method was used to calculate RRs for abatacept versus TNFi. The two TNFi studies (one using adalimumab, one using certolizumab) that reported infection rates had effect sizes in different directions, so these were separately compared to the abatacept trials. TNFi showed a significant benefit over abatacept for ACR20 and PASI-75, but not for HAQ-DI or rate of infection due to imprecision in effect estimates (Table 1).

Quality of evidence across all critical outcomes: Low

**Table 1. TNFi compared to abatacept for patients with active PsA despite OSM**

Bibliography: PICO 67: TNFi compared to abatacept for patients with active PsA despite OSM

| Quality assessment |         |               |              |             |                  |                    | Summary of findings |                              |  |
|--------------------|---------|---------------|--------------|-------------|------------------|--------------------|---------------------|------------------------------|--|
| Nº of participants | Risk of | Inconsistency | Indirectness | Imprecision | Publication bias | Overall quality of | Relative effect     | Anticipated absolute effects |  |
|                    |         |               |              |             |                  |                    |                     |                              |  |

**Table 1. TNFi compared to abatacept for patients with active PsA despite OSM**

Bibliography: PICO 67: TNFi compared to abatacept for patients with active PsA despite OSM

| Quality assessment                                                          |                |             |                      |                      |      |                  | Summary of findings |             |                                                                   |                             |                                                                           |
|-----------------------------------------------------------------------------|----------------|-------------|----------------------|----------------------|------|------------------|---------------------|-------------|-------------------------------------------------------------------|-----------------------------|---------------------------------------------------------------------------|
| (studies)<br>Follow-up                                                      | bias           |             |                      |                      |      | evidence         | With<br>TNFi        | With<br>ABT | (95%<br>CI)                                                       | Risk<br>with<br>TNFi        | Risk<br>difference<br>with ABT                                            |
| <b>ACR20, 12-24 weeks, Bucher adjusted indirect comparison</b>              |                |             |                      |                      |      |                  |                     |             |                                                                   |                             |                                                                           |
| 2075 (11<br>RCTs)                                                           | Not<br>serious | Not serious | Serious <sup>a</sup> | Not serious          | None | ⊕⊕⊕○<br>MODERATE | TNFi                | ABT         | <b>RR 0.46</b><br>(0.30 to<br>0.69)<br><br><b>Favors<br/>TNFi</b> | 583 per<br>1,000<br>(0.583) | <b>315 fewer<br/>per 1,000<br/>(0.315)</b> (408<br>fewer to 181<br>fewer) |
| <b>HAQ-DI<sup>c</sup>, 12-24 weeks, Bucher adjusted indirect comparison</b> |                |             |                      |                      |      |                  |                     |             |                                                                   |                             |                                                                           |
| 1715 (9<br>RCTs)                                                            | Not<br>serious | Not serious | Serious <sup>a</sup> | Serious <sup>b</sup> | None | ⊕⊕○○<br>LOW      | TNFi                | ABT         | <b>RR 0.85</b><br>(0.43 to<br>1.66)                               | 547 per<br>1,000<br>(0.547) | <b>82 fewer<br/>per 1,000<br/>(0.082)</b> (312<br>fewer to 361<br>more)   |
| <b>PASI 75, 12-24 weeks, Bucher adjusted indirect comparison</b>            |                |             |                      |                      |      |                  |                     |             |                                                                   |                             |                                                                           |
| 1342 (10<br>RCTs)                                                           | Not<br>serious | Not serious | Serious <sup>a</sup> | Not serious          | None | ⊕⊕⊕○<br>MODERATE | TNFi                | ABT         | <b>RR 0.19</b><br>(0.08 to<br>0.43)<br><br><b>Favors<br/>TNFi</b> | 494 per<br>1,000<br>(0.494) | <b>400 fewer<br/>per 1,000<br/>(0.4)</b> (454<br>fewer to 282<br>fewer)   |
| <b>Infection, 12-24 weeks, Bucher adjusted indirect comparison</b>          |                |             |                      |                      |      |                  |                     |             |                                                                   |                             |                                                                           |

**Table 1. TNFi compared to abatacept for patients with active PsA despite OSM**

Bibliography: PICO 67: TNFi compared to abatacept for patients with active PsA despite OSM

| Quality assessment |             |             |                      |                      |      |             | Summary of findings |     |                                  |                          |                                                          |
|--------------------|-------------|-------------|----------------------|----------------------|------|-------------|---------------------|-----|----------------------------------|--------------------------|----------------------------------------------------------|
| 524 (2 RCTs)       | Not serious | Not serious | Serious <sup>a</sup> | Serious <sup>b</sup> | None | ⊕⊕○○<br>LOW | ADA                 | ABT | <b>RR 1.67</b><br>(0.75 to 3.69) | 176 per 1,000<br>(0.176) | <b>118 more per 1,000 (0.118)</b> (44 fewer to 473 more) |
| 698 (2 RCTs)       | Not serious | Not serious | Serious <sup>a</sup> | Serious <sup>b</sup> | None | ⊕⊕○○<br>LOW | CZP                 | ABT | <b>RR 0.79</b><br>(0.52 to 1.21) | 435 per 1,000<br>(0.435) | <b>91 fewer per 1,000 (0.091)</b> (209 fewer to 91 more) |

CI: Confidence interval; RR: Risk ratio

- Indirect comparison, all studies compared drug to placebo, only 50-75% of patients had prior OSM exposure.
- Wide 95% CI
- HAQ-DI measured as proportion of patients who achieved minimum clinically important improvement (>0.3 or 0.35 in different studies).

**Table 2. TNFi or abatacept compared to placebo for PICO 67: Adverse events**

Bibliography: PICO 67: TNFi versus abatacept for PsA patients who failed OSM.

| Quality assessment                               |              |               |              |             |                  |                             | Summary of findings   |              |                          |                              |                              |
|--------------------------------------------------|--------------|---------------|--------------|-------------|------------------|-----------------------------|-----------------------|--------------|--------------------------|------------------------------|------------------------------|
| No of participants (studies)<br>Follow-up        | Risk of bias | Inconsistency | Indirectness | Imprecision | Publication bias | Overall quality of evidence | Study event rates (%) |              | Relative effect (95% CI) | Anticipated absolute effects |                              |
|                                                  |              |               |              |             |                  |                             | With ABT or TNFi      | With placebo |                          | Risk with ABT or TNFi        | Risk difference with placebo |
| <b>Serious infection – Abatacept vs. placebo</b> |              |               |              |             |                  |                             |                       |              |                          |                              |                              |

**Table 2. TNFi or abatacept compared to placebo for PICO 67: Adverse events**

Bibliography: PICO 67: TNFi versus abatacept for PsA patients who failed OSM.

| Quality assessment                          |             |             |                      |                      |      |             | Summary of findings |                 |                                  |                        |                                                          |
|---------------------------------------------|-------------|-------------|----------------------|----------------------|------|-------------|---------------------|-----------------|----------------------------------|------------------------|----------------------------------------------------------|
| 506<br>(2 RCTs)                             | not serious | not serious | serious <sup>a</sup> | serious <sup>b</sup> | none | ⊕⊕○○<br>LOW | 2/253<br>(0.8%)     | 0/253<br>(0%)   | <b>RR 0.33</b><br>(0.03 to 3.13) | 8 per 1,000<br>(0.008) | <b>5 fewer per 1,000 (0.005)</b><br>(0 fewer to 25 more) |
| <b>Serious infection – TNFi vs. placebo</b> |             |             |                      |                      |      |             |                     |                 |                                  |                        |                                                          |
| 1151<br>(5 RCTs)                            | not serious | not serious | serious <sup>a</sup> | serious <sup>b</sup> | none | ⊕⊕○○<br>LOW | 4/587<br>(0.7%)     | 8/564<br>(1.4%) | <b>RR 1.85</b><br>(0.56 to 5.88) | 7 per 1,000<br>(0.007) | <b>6 more per 1,000 (0.006)</b><br>(3 fewer to 34 more)  |

**CI:** Confidence interval; **RR:** Risk ratio

- a. Comparison to placebo
- b. Wide 95% CI

Working Group quality of evidence categories:

**High quality:** We are very confident that the true effect lies close to that of the estimate of the effect

**Moderate quality:** We are moderately confident in the effect estimate: The true effect is likely to be close to the estimate of the effect, but there is a possibility that it is substantially different

**Low quality:** Our confidence in the effect estimate is limited: The true effect may be substantially different from the estimate of the effect

**Very low quality:** We have very little confidence in the effect estimate: The true effect is likely to be substantially different from the estimate of effect

#### References:

1. Mease PJ, Fleischmann R, Deodhar AA, Wollenhaupt J, Khraishi M, Kielar D, et al. Effect of certolizumab pegol on signs and symptoms in patients with psoriatic arthritis: 24-week results of a Phase 3 double-blind randomised placebo-controlled study (RAPID-PsA). *Ann Rheum Dis.* 2014;73(1):48-55.
2. Gladman D, Fleischmann R, Coteur G, Woltering F, Mease PJ. Effect of certolizumab pegol on multiple facets of psoriatic arthritis as reported by patients: 24-week patient-reported outcome results of a phase III, multicenter study. *Arthritis Care Res (Hoboken).* 2014;66(7):1085-1092.

3. Genovese MC, Mease PJ, Thomson GT, Kivitz AJ, Perdok RJ, Weinberg MA, et al. Safety and efficacy of adalimumab in treatment of patients with psoriatic arthritis who had failed disease modifying antirheumatic drug therapy. *J Rheumatol.* 2007;34(5):1040-1050.
4. Mease PJ, Gladman DD, Ritchlin CT, Ruderman EM, Steinfeld SD, Choy EH, et al. Adalimumab for the treatment of patients with moderately to severely active psoriatic arthritis: results of a double-blind, randomized, placebo-controlled trial. *Arthritis Rheum.* 2005;52(10):3279-3289.
5. Gladman DD, Mease PJ, Cifaldi MA, Perdok RJ, Sasso E, Medich J. Adalimumab improves joint-related and skin-related functional impairment in patients with psoriatic arthritis: patient-reported outcomes of the Adalimumab Effectiveness in Psoriatic Arthritis Trial. *Ann Rheum Dis.* 2007;66(2):163-168.
6. Mease PJ, Kivitz AJ, Burch FX, Siegel EL, Cohen SB, Ory P, et al. Etanercept treatment of psoriatic arthritis: safety, efficacy, and effect on disease progression. *Arthritis Rheum.* 2004;50(7):2264-2272.
7. Mease PJ, Woolley JM, Singh A, Tsuji W, Dunn M, Chiou CF. Patient-reported outcomes in a randomized trial of etanercept in psoriatic arthritis. *J Rheumatol.* 2010;37(6):1221-1227.
8. Antoni C, Krueger GG, de Vlam K, Birbara C, Beutler A, Guzzo C, et al. Infliximab improves signs and symptoms of psoriatic arthritis: results of the IMPACT 2 trial. *Ann Rheum Dis.* 2005;64(8):1150-1157.
9. Mease PJ, Goffe BS, Metz J, VanderStoep A, Finck B, Burge DJ. Etanercept in the treatment of psoriatic arthritis and psoriasis: a randomised trial. *Lancet.* 2000;356(9227):385-390.
10. Kavanaugh A, McInnes I, Mease P, Krueger GG, Gladman D, Gomez-Reino J, et al. Golimumab, a new human tumor necrosis factor alpha antibody, administered every four weeks as a subcutaneous injection in psoriatic arthritis: Twenty-four-week efficacy and safety results of a randomized, placebo-controlled study. *Arthritis Rheum.* 2009;60(4):976-986.
11. Antoni CE, Kavanaugh A, Kirkham B, Tutuncu Z, Burmester GR, Schneider U, et al. Sustained benefits of infliximab therapy for dermatologic and articular manifestations of psoriatic arthritis: results from the infliximab multinational psoriatic arthritis controlled trial (IMPACT). *Arthritis Rheum.* 2005;52(4):1227-1236.
12. Torii H, Nakagawa H, Japanese Infliximab Study i. Infliximab monotherapy in Japanese patients with moderate-to-severe plaque psoriasis and psoriatic arthritis. A randomized, double-blind, placebo-controlled multicenter trial. *J Dermatol Sci.* 2010;59(1):40-49.
13. Mease P, Genovese MC, Gladstein G, Kivitz AJ, Ritchlin C, Tak PP, et al. Abatacept in the treatment of patients with psoriatic arthritis: results of a six-month, multicenter, randomized, double-blind, placebo-controlled, phase II trial. *Arthritis Rheum.* 2011;63(4):939-948.
14. Mease PJ, Gottlieb AB, van der Heijde D, FitzGerald O, Johnsen A, Nys M, et al. Efficacy and safety of abatacept, a T-cell modulator, in a randomised, double-blind, placebo-controlled, phase III study in psoriatic arthritis. *Ann Rheum Dis.* 2017.

**PICO 68. In adult patients with active PsA despite treatment with an OSM, what are the benefits and harms of switching to an IL12/23i compared to switching to abatacept?**

Summary: Five placebo-controlled RCTs indirectly addressed this PICO question. Three studies compared IL 12/23 (ustekinumab) with placebo in PsA patients.[1-3] Two studies compared abatacept with placebo in PsA patients.[4,5] Statistically significant differences favoring ustekinumab over placebo were reported for all efficacy outcomes (ACR20, HAQ-DI, PASI-75, data not shown), while abatacept showed a significant benefit over placebo only for ACR20 (data not shown). No statistically significant differences with placebo occurred for any adverse events (see Table 2 for serious infections).

The adjusted indirect comparison method was used to calculate RRs for abatacept versus ustekinumab. Ustekinumab showed a significant benefit over abatacept for PASI-75, but not for ACR20, HAQ-DI and rate of infections (there was imprecision in the effect estimates for these outcomes, see Table 1)).

Quality of evidence across all critical outcomes: Low

| <b>Table 1. IL12/23i compared to abatacept for patients with active PsA despite OSM</b>        |              |               |                      |                      |                  |                             |                     |          |                                  |                              |                                                      |
|------------------------------------------------------------------------------------------------|--------------|---------------|----------------------|----------------------|------------------|-----------------------------|---------------------|----------|----------------------------------|------------------------------|------------------------------------------------------|
| Bibliography: PICO 68: IL12/23i compared to abatacept for patients with active PsA despite OSM |              |               |                      |                      |                  |                             |                     |          |                                  |                              |                                                      |
| Quality assessment                                                                             |              |               |                      |                      |                  |                             | Summary of findings |          |                                  |                              |                                                      |
| No of participants (studies)<br>Follow-up                                                      | Risk of bias | Inconsistency | Indirectness         | Imprecision          | Publication bias | Overall quality of evidence |                     |          | Relative effect (95% CI)         | Anticipated absolute effects |                                                      |
|                                                                                                |              |               |                      |                      |                  |                             | With IL12/23i       | With ABT |                                  | Risk with IL12/23i           | Risk difference with ABT                             |
| <b>ACR20, 12-24 weeks, Bucher adjusted indirect comparison</b>                                 |              |               |                      |                      |                  |                             |                     |          |                                  |                              |                                                      |
| 1579 (5 RCTs)                                                                                  | Not serious  | Not serious   | Serious <sup>a</sup> | Serious <sup>b</sup> | None             | ⊕⊕○○<br>LOW                 | IL12/23i            | ABT      | <b>RR 0.87</b><br>(0.61 to 1.24) | 449 per 1,000<br>(0.449)     | <b>58 fewer per 1,000</b><br>(175 fewer to 108 more) |
| <b>HAQ-DI<sup>c</sup>, 12-24 weeks, Bucher adjusted indirect comparison</b>                    |              |               |                      |                      |                  |                             |                     |          |                                  |                              |                                                      |



**Table 1. IL12/23i compared to abatacept for patients with active PsA despite OSM**

Bibliography: PICO 68: IL12/23i compared to abatacept for patients with active PsA despite OSM

| Quality assessment                                                 |             |             |                      |                      |      |                  | Summary of findings |     |                                                            |                       |                                                        |
|--------------------------------------------------------------------|-------------|-------------|----------------------|----------------------|------|------------------|---------------------|-----|------------------------------------------------------------|-----------------------|--------------------------------------------------------|
| 1370 (5 RCTs)                                                      | Not serious | Not serious | Serious <sup>a</sup> | Serious <sup>b</sup> | None | ⊕⊕○○<br>LOW      | IL12/23i            | ABT | <b>RR 0.84</b><br>(0.43 to 1.65)                           | 441 per 1,000 (0.441) | <b>71 fewer per 1,000</b><br>(251 fewer to 287 more)   |
| <b>PASI 75, 12-24 weeks, Bucher adjusted indirect comparison</b>   |             |             |                      |                      |      |                  |                     |     |                                                            |                       |                                                        |
| 1135 (5 RCTs)                                                      | Not serious | Not serious | Serious <sup>a</sup> | Not serious          | None | ⊕⊕⊕○<br>MODERATE | IL12/23i            | ABT | <b>RR 0.26</b><br>(0.14 to 0.49)<br><b>Favors IL12/23i</b> | 569 per 1,000 (0.569) | <b>421 fewer per 1,000</b><br>(290 fewer to 489 fewer) |
| <b>Infection, 12-24 weeks, Bucher adjusted indirect comparison</b> |             |             |                      |                      |      |                  |                     |     |                                                            |                       |                                                        |
| 1349 (3 RCTs)                                                      | Not serious | Not serious | Serious <sup>a</sup> | Serious <sup>b</sup> | None | ⊕⊕○○<br>LOW      | IL12/23i            | ABT | <b>RR 0.94</b><br>(0.63 to 1.41)                           | 211 per 1,000 (0.211) | <b>13 fewer per 1,000</b><br>(78 fewer to 87 more)     |

CI: Confidence interval; RR: Risk ratio

- a. Indirect comparison, all studies compared drug to placebo, only 50-75% of patients had prior OSM exposure.
- b. Wide 95% CI
- c. HAQ-DI measured as proportion of patients who achieved minimum clinically important improvement (>0.3 or 0.35 in different studies).

**Table 2. IL12/23i or abatacept compared to placebo for PICO 67: Adverse events**

Bibliography: PICO 68: IL 12/23i versus abatacept for PsA patients who failed OSM.

| Quality assessment | Summary of findings |
|--------------------|---------------------|
|--------------------|---------------------|

**Table 2. IL12/23i or abatacept compared to placebo for PICO 67: Adverse events**

Bibliography: PICO 68: IL 12/23i versus abatacept for PsA patients who failed OSM.

| Quality assessment                                 |              |               |                      |                      |                  |                             | Summary of findings   |                 |                                  |                              |                                                  |
|----------------------------------------------------|--------------|---------------|----------------------|----------------------|------------------|-----------------------------|-----------------------|-----------------|----------------------------------|------------------------------|--------------------------------------------------|
| No of participants (studies)<br>Follow-up          | Risk of bias | Inconsistency | Indirectness         | Imprecision          | Publication bias | Overall quality of evidence | Study event rates (%) |                 | Relative effect (95% CI)         | Anticipated absolute effects |                                                  |
|                                                    |              |               |                      |                      |                  |                             | With ABT or IL12/23i  | With placebo    |                                  | Risk with ABT or IL12/23i    | Risk difference with placebo                     |
| <b>Serious infection – Abatacept vs. placebo</b>   |              |               |                      |                      |                  |                             |                       |                 |                                  |                              |                                                  |
| 506<br>(2 RCTs)                                    | not serious  | not serious   | serious <sup>a</sup> | serious <sup>b</sup> | none             | ⊕⊕○○<br>LOW                 | 2/253<br>(0.8%)       | 0/253<br>(0%)   | <b>RR 0.33</b><br>(0.03 to 3.13) | 8 per 1,000                  | <b>5 fewer per 1,000</b><br>(0 fewer to 25 more) |
| <b>Serious infection – Ustekinumab vs. placebo</b> |              |               |                      |                      |                  |                             |                       |                 |                                  |                              |                                                  |
| 925<br>(2 RCTs)                                    | not serious  | serious       | serious <sup>a</sup> | serious <sup>b</sup> | none             | ⊕⊕○○<br>LOW                 | 4/616<br>(0.6%)       | 2/309<br>(0.6%) | <b>RR 1.19</b><br>(0.29 to 4.98) | 6 per 1,000<br>(0.006)       | <b>1 more per 1,000</b><br>(4 fewer to 24 more)  |

CI: Confidence interval; RR: Risk ratio

a. Comparison to placebo

b. Wide 95% CI

Working Group quality of evidence categories:

**High quality:** We are very confident that the true effect lies close to that of the estimate of the effect

**Moderate quality:** We are moderately confident in the effect estimate: The true effect is likely to be close to the estimate of the effect, but there is a possibility that it is substantially different

**Low quality:** Our confidence in the effect estimate is limited: The true effect may be substantially different from the estimate of the effect

**Very low quality:** We have very little confidence in the effect estimate: The true effect is likely to be substantially different from the estimate of effect

References:

1. McInnes IB, Kavanaugh A, Gottlieb AB, Puig L, Rahman P, Ritchlin C, et al. Efficacy and safety of ustekinumab in patients with active psoriatic arthritis: 1 year results of the phase 3, multicentre, double-blind, placebo-controlled PSUMMIT 1 trial. *Lancet*. 2013;382(9894):780-789.
2. Gottlieb A, Menter A, Mendelsohn A, Shen YK, Li S, Guzzo C, et al. Ustekinumab, a human interleukin 12/23 monoclonal antibody, for psoriatic arthritis: randomised, double-blind, placebo-controlled, crossover trial. *Lancet*. 2009;373(9664):633-640.
3. Ritchlin C, Rahman P, Kavanaugh A, McInnes IB, Puig L, Li S, et al. Efficacy and safety of the anti-IL-12/23 p40 monoclonal antibody, ustekinumab, in patients with active psoriatic arthritis despite conventional non-biological and biological anti-tumour necrosis factor therapy: 6-month and 1-year results of the phase 3, multicentre, double-blind, placebo-controlled, randomised PSUMMIT 2 trial. *Ann Rheum Dis*. 2014;73(6):990-999.
4. Mease P, Genovese MC, Gladstein G, Kivitz AJ, Ritchlin C, Tak PP, et al. Abatacept in the treatment of patients with psoriatic arthritis: results of a six-month, multicenter, randomized, double-blind, placebo-controlled, phase II trial. *Arthritis Rheum*. 2011;63(4):939-948.
5. Mease PJ, Gottlieb AB, van der Heijde D, FitzGerald O, Johnsen A, Nys M, et al. Efficacy and safety of abatacept, a T-cell modulator, in a randomised, double-blind, placebo-controlled, phase III study in psoriatic arthritis. *Ann Rheum Dis*. 2017.

**PICO 69. In adult patients with active PsA despite treatment with an OSM, what are the benefits and harms of switching to an IL17i compared to switching to abatacept?**

Summary: Nine placebo-controlled RCTs indirectly addressed this PICO question. Seven studies compared IL17i to placebo: One study compared ixekizumab to placebo,[1] three studies compared secukinumab to placebo,[2-4] and three studies compared brodalumab to placebo[5-7] (note: brodalumab is currently FDA-approved for psoriasis but not PsA). Two studies compared abatacept with placebo in PsA patients.[8,9] Statistically significant differences favoring IL17i over placebo were reported for all efficacy outcomes (ACR20, HAQ-DI, PASI-75, data not shown), while abatacept showed a significant benefit over placebo only for ACR20 (data not shown). No statistically significant differences with placebo occurred for any adverse events (see Table 2 for serious infections).

The adjusted indirect comparison method was used to calculate RRs for abatacept versus IL17i. IL17i showed a significant benefit over abatacept for PASI-75, but not for ACR20, HAQ-DI and rate of infections (there was imprecision in the effect estimates for these outcomes).

Quality of evidence across all critical outcomes: Low

| <b>Table 1. IL17i compared to abatacept for patients with active PsA despite OSM</b>        |              |               |                      |                      |                  |                             |                     |          |                                  |                              |                                                             |
|---------------------------------------------------------------------------------------------|--------------|---------------|----------------------|----------------------|------------------|-----------------------------|---------------------|----------|----------------------------------|------------------------------|-------------------------------------------------------------|
| Bibliography: PICO 69: IL17i compared to abatacept for patients with active PsA despite OSM |              |               |                      |                      |                  |                             |                     |          |                                  |                              |                                                             |
| Quality assessment                                                                          |              |               |                      |                      |                  |                             | Summary of findings |          |                                  |                              |                                                             |
| No of participants (studies)<br>Follow-up                                                   | Risk of bias | Inconsistency | Indirectness         | Imprecision          | Publication bias | Overall quality of evidence |                     |          | Relative effect (95% CI)         | Anticipated absolute effects |                                                             |
|                                                                                             |              |               |                      |                      |                  |                             | With IL17i          | With ABT |                                  | Risk with IL17i              | Risk difference with ABT                                    |
| <b>ACR20, 12-24 weeks, Bucher adjusted indirect comparison</b>                              |              |               |                      |                      |                  |                             |                     |          |                                  |                              |                                                             |
| 1463 (7 RCTs)                                                                               | Not serious  | Not serious   | Serious <sup>a</sup> | Serious <sup>b</sup> | None             | ⊕⊕○○<br>LOW                 | IL17i               | ABT      | <b>RR 0.76</b><br>(0.53 to 1.09) | 505 per 1,000 (0.505)        | <b>121 fewer per 1,000</b><br>(0.121)(237 fewer to 45 more) |
| <b>HAQ-DI<sup>c</sup>, 12-24 weeks, Bucher adjusted indirect comparison</b>                 |              |               |                      |                      |                  |                             |                     |          |                                  |                              |                                                             |

**Table 1. IL17i compared to abatacept for patients with active PsA despite OSM**

Bibliography: PICO 69: IL17i compared to abatacept for patients with active PsA despite OSM

| Quality assessment                                                 |             |             |                      |                      |      |                  | Summary of findings |     |                                                             |                       |                                                                |
|--------------------------------------------------------------------|-------------|-------------|----------------------|----------------------|------|------------------|---------------------|-----|-------------------------------------------------------------|-----------------------|----------------------------------------------------------------|
| 1151 (6 RCTs)                                                      | Not serious | Not serious | Serious <sup>a</sup> | Serious <sup>b</sup> | None | ⊕⊕○○<br>LOW      | IL17i               | ABT | <b>OR 0.98</b><br>(0.39 to 2.50)                            | 556 per 1,000 (0.556) | 5 fewer per 1,000 (0.005) (228 fewer to 202 more) <sup>d</sup> |
| <b>PASI 75, 12-24 weeks, Bucher adjusted indirect comparison</b>   |             |             |                      |                      |      |                  |                     |     |                                                             |                       |                                                                |
| 1167 (9 RCTs)                                                      | Not serious | Not serious | Serious <sup>a</sup> | Not serious          | None | ⊕⊕⊕○<br>MODERATE | IL17i               | ABT | <b>RR 0.21</b><br>(0.10 to 0.42)<br><br><b>Favors IL17i</b> | 643 per 1,000 (0.643) | <b>508 fewer per 1,000</b> (0.508)(373 fewer to 579 fewer)     |
| <b>Infection, 12-24 weeks, Bucher adjusted indirect comparison</b> |             |             |                      |                      |      |                  |                     |     |                                                             |                       |                                                                |
| 1026 (3 RCTs)                                                      | Not serious | Not serious | Serious <sup>a</sup> | Serious <sup>b</sup> | None | ⊕⊕○○<br>LOW      | IL17i               | ABT | <b>RR 0.74</b><br>(0.46 to 1.20)                            | 321 per 1,000 (0.321) | <b>83 fewer per 1,000</b> (0.083)(173 fewer to 64 more)        |

**CI:** Confidence interval; **RR:** Risk ratio

- Indirect comparison, all studies compared drug to placebo, only 50-75% of patients had prior OSM exposure.
- Wide 95% CI
- HAQ-DI measured as proportion of patients who achieved minimum clinically important improvement (>0.3 or 0.35 in different studies).
- Absolute risk differences calculated from odds ratios obtained using the Bucher method.

**Table 2. IL17i or abatacept compared to placebo for PICO 69: Adverse events**

Bibliography: PICO 69: IL 17i versus abatacept for PsA patients who failed OSM.

| Quality assessment                               |              |               |                      |                      |                  |                             | Summary of findings   |                 |                                  |                              |                                                           |
|--------------------------------------------------|--------------|---------------|----------------------|----------------------|------------------|-----------------------------|-----------------------|-----------------|----------------------------------|------------------------------|-----------------------------------------------------------|
| Nº of participants (studies)<br>Follow-up        | Risk of bias | Inconsistency | Indirectness         | Imprecision          | Publication bias | Overall quality of evidence | Study event rates (%) |                 | Relative effect (95% CI)         | Anticipated absolute effects |                                                           |
|                                                  |              |               |                      |                      |                  |                             | With ABT or IL17i     | With placebo    |                                  | Risk with ABT or IL17i       | Risk difference with placebo                              |
| <b>Serious infection – Abatacept vs. placebo</b> |              |               |                      |                      |                  |                             |                       |                 |                                  |                              |                                                           |
| 506<br>(2 RCTs)                                  | not serious  | not serious   | serious <sup>a</sup> | serious <sup>b</sup> | none             | ⊕⊕○○<br>LOW                 | 2/253<br>(0.8%)       | 0/253<br>(0%)   | <b>RR 0.33</b><br>(0.03 to 3.13) | 8 per 1,000<br>(0.008)       | <b>5 fewer per 1,000 (0.005)</b><br>(8 fewer to 25 more)  |
| <b>Serious infection – IL17i vs. placebo</b>     |              |               |                      |                      |                  |                             |                       |                 |                                  |                              |                                                           |
| 1189<br>(3 RCTs)                                 | not serious  | not serious   | serious <sup>a</sup> | serious <sup>b</sup> | none             | ⊕⊕○○<br>LOW                 | 18/685<br>(2.6%)      | 5/406<br>(1.2%) | <b>RR 0.56</b><br>(0.23 to 1.33) | 26 per 1,000<br>(0.026)      | <b>11 fewer per 1,000 (0.011)</b><br>(20 fewer to 9 more) |

CI: Confidence interval; RR: Risk ratio

a. Comparison to placebo

b. Wide 95% CI

Working Group quality of evidence categories:

**High quality:** We are very confident that the true effect lies close to that of the estimate of the effect

**Moderate quality:** We are moderately confident in the effect estimate: The true effect is likely to be close to the estimate of the effect, but there is a possibility that it is substantially different

**Low quality:** Our confidence in the effect estimate is limited: The true effect may be substantially different from the estimate of the effect

**Very low quality:** We have very little confidence in the effect estimate: The true effect is likely to be substantially different from the estimate of effect

## References:

1. Mease PJ, van der Heijde D, Ritchlin CT, Okada M, Cuchacovich RS, Shuler CL, et al. Ixekizumab, an interleukin-17A specific monoclonal antibody, for the treatment of biologic-naive patients with active psoriatic arthritis: results from the 24-week randomised, double-blind, placebo-controlled and active (adalimumab)-controlled period of the phase III trial SPIRIT-P1. *Ann Rheum Dis.* 2017;76(1):79-87.
2. McInnes IB, Mease PJ, Kirkham B, Kavanaugh A, Ritchlin CT, Rahman P, et al. Secukinumab, a human anti-interleukin-17A monoclonal antibody, in patients with psoriatic arthritis (FUTURE 2): a randomised, double-blind, placebo-controlled, phase 3 trial. *Lancet.* 2015;386(9999):1137-1146.
3. McInnes IB, Sieper J, Braun J, Emery P, van der Heijde D, Isaacs JD, et al. Efficacy and safety of secukinumab, a fully human anti-interleukin-17A monoclonal antibody, in patients with moderate-to-severe psoriatic arthritis: a 24-week, randomised, double-blind, placebo-controlled, phase II proof-of-concept trial. *Ann Rheum Dis.* 2014;73(2):349-356.
4. Mease PJ, McInnes IB, Kirkham B, Kavanaugh A, Rahman P, van der Heijde D, et al. Secukinumab Inhibition of Interleukin-17A in Patients with Psoriatic Arthritis. *N Engl J Med.* 2015;373(14):1329-1339.
5. Mease PJ, Genovese MC, Greenwald MW, Ritchlin CT, Beaulieu AD, Deodhar A, et al. Brodalumab, an anti-IL17RA monoclonal antibody, in psoriatic arthritis. *N Engl J Med.* 2014;370(24):2295-2306.
6. Nakagawa H, Niino H, Ootaki K, Japanese brodalumab study g. Brodalumab, a human anti-interleukin-17-receptor antibody in the treatment of Japanese patients with moderate-to-severe plaque psoriasis: Efficacy and safety results from a phase II randomized controlled study. *J Dermatol Sci.* 2016;81(1):44-52.
7. Papp K, Menter A, Strober B, Kricorian G, Thompson EH, Milmont CE, et al. Efficacy and safety of brodalumab in subpopulations of patients with difficult-to-treat moderate-to-severe plaque psoriasis. *J Am Acad Dermatol.* 2015;72(3):436-439 e431.
8. Mease P, Genovese MC, Gladstein G, Kivitz AJ, Ritchlin C, Tak PP, et al. Abatacept in the treatment of patients with psoriatic arthritis: results of a six-month, multicenter, randomized, double-blind, placebo-controlled, phase II trial. *Arthritis Rheum.* 2011;63(4):939-948.
9. Mease PJ, Gottlieb AB, van der Heijde D, FitzGerald O, Johnsen A, Nys M, et al. Efficacy and safety of abatacept, a T-cell modulator, in a randomised, double-blind, placebo-controlled, phase III study in psoriatic arthritis. *Ann Rheum Dis.* 2017.

**PICO 70. In adult patients with active PsA despite treatment with a TNFi monotherapy, what are the benefits and harms of switching to a second TNFi compared to switching to abatacept?**

Summary: This PICO question was addressed indirectly by three double-blind RCTs (4 publications). In addition to lack of direct drug comparisons, only 19% to 39% of patients in each study had prior TNFi exposure. One study (2 publications) involving PsA patients compared TNFi (CZP) to placebo.[1,2] Two studies compared abatacept with placebo in PsA patients.[3,4] CZP showed statistically significant benefit over placebo for all effectiveness outcomes (ACR20, HAQ-DI, and PASI-75, data not shown), while abatacept showed significant benefit over placebo only for ACR20 (data not shown). For serious infections there were no significant between-group differences, but with very high imprecision due to the low number of events (data not shown).

The adjusted indirect comparison method was used to calculate RRs for CZP vs. abatacept. For ACR20 we also performed this calculation using data only from patients with prior TNFi exposure (two studies reported separate data for these patients). CZP showed a significant benefit over abatacept for PASI75, but not for other outcomes (all were imprecise, see Table 1).

Quality of evidence across all critical outcomes: Low

| <b>Table 1. TNFi compared to abatacept for patients with active PsA despite TNFi</b>               |                     |                      |                      |                      |                         |                                    |                            |                 |                                  |                                     |                                                           |
|----------------------------------------------------------------------------------------------------|---------------------|----------------------|----------------------|----------------------|-------------------------|------------------------------------|----------------------------|-----------------|----------------------------------|-------------------------------------|-----------------------------------------------------------|
| <b>Bibliography: PICO 70: TNFi compared to abatacept for patients with active PsA despite TNFi</b> |                     |                      |                      |                      |                         |                                    |                            |                 |                                  |                                     |                                                           |
| <b>Quality assessment</b>                                                                          |                     |                      |                      |                      |                         |                                    | <b>Summary of findings</b> |                 |                                  |                                     |                                                           |
| <b>№ of participants (studies) Follow-up</b>                                                       | <b>Risk of bias</b> | <b>Inconsistency</b> | <b>Indirectness</b>  | <b>Imprecision</b>   | <b>Publication bias</b> | <b>Overall quality of evidence</b> |                            |                 | <b>Relative effect (95% CI)</b>  | <b>Anticipated absolute effects</b> |                                                           |
|                                                                                                    |                     |                      |                      |                      |                         |                                    | <b>With TNFi</b>           | <b>With ABT</b> |                                  | <b>Risk with TNFi</b>               | <b>Risk difference with ABT</b>                           |
| <b>ACR20, 12-24 weeks, Bucher adjusted indirect comparison</b>                                     |                     |                      |                      |                      |                         |                                    |                            |                 |                                  |                                     |                                                           |
| 780 (3 RCTs)                                                                                       | Not serious         | Not serious          | Serious <sup>a</sup> | Serious <sup>b</sup> | None                    | ⊕⊕○○<br>LOW                        | CZP                        | ABT             | <b>RR 0.69</b><br>(0.45 to 1.06) | 638 per 1,000<br>(0.638)            | <b>198 fewer per 1,000 (0.198)</b> (351 fewer to 38 more) |
| <b>ACR20, 12-24 weeks, Bucher adjusted indirect comparison, TNFi-exposed</b>                       |                     |                      |                      |                      |                         |                                    |                            |                 |                                  |                                     |                                                           |



**Table 1. TNFi compared to abatacept for patients with active PsA despite TNFi**

Bibliography: PICO 70: TNFi compared to abatacept for patients with active PsA despite TNFi

| Quality assessment                                                          |             |             |                      |                      |      |                  | Summary of findings |     |                                  |                          |                                                                       |
|-----------------------------------------------------------------------------|-------------|-------------|----------------------|----------------------|------|------------------|---------------------|-----|----------------------------------|--------------------------|-----------------------------------------------------------------------|
| 339 (2 RCTs)                                                                | Not serious | Not serious | Serious <sup>a</sup> | Serious <sup>b</sup> | None | ⊕⊕○○<br>LOW      | CZP                 | ABT | <b>RR 0.32</b><br>(0.10 to 1.01) | 593 per 1,000<br>(0.593) | <b>403 fewer per 1,000 (0.403)</b> (534 fewer to 6 more)              |
| <b>HAQ-DI<sup>c</sup>, 12-24 weeks, Bucher adjusted indirect comparison</b> |             |             |                      |                      |      |                  |                     |     |                                  |                          |                                                                       |
| 578 (3 RCTs)                                                                | Not serious | Not serious | Serious <sup>a</sup> | Serious <sup>b</sup> | None | ⊕⊕○○<br>LOW      | CZP                 | ABT | <b>RR 1.14</b><br>(0.59 to 2.21) | 580 per 1,000<br>(0.580) | <b>16 more per 1,000 (0.016)</b> (213 fewer to 210 more) <sup>d</sup> |
| <b>PASI 75, 12-24 weeks, Bucher adjusted indirect comparison</b>            |             |             |                      |                      |      |                  |                     |     |                                  |                          |                                                                       |
| 512 (3 RCTs)                                                                | Not serious | Not serious | Serious <sup>a</sup> | Not serious          | None | ⊕⊕⊕○<br>MODERATE | CZP                 | ABT | <b>RR 0.41</b><br>(0.19 to 0.90) | 622 per 1,000<br>(0.622) | 367 fewer per 1,000<br>(0.367)                                        |
| <b>Infection, 12-24 weeks, Bucher adjusted indirect comparison</b>          |             |             |                      |                      |      |                  |                     |     |                                  |                          |                                                                       |
| 698 (2 RCTs)                                                                | Not serious | Not serious | Serious <sup>a</sup> | Serious <sup>b</sup> | None | ⊕⊕○○<br>LOW      | CZP                 | ABT | <b>RR 0.79</b><br>(0.52 to 1.21) | 435 per 1,000<br>(0.435) | <b>91 fewer per 1,000 (0.091)</b> (209 fewer to 91 more)              |

CI: Confidence interval; RR: Risk ratio

- a. Indirect comparison, all studies compared drug to placebo, only 50-75% of patients had prior OSM exposure.
- b. Wide 95% CI
- c. HAQ-DI measured as proportion of patients who achieved minimum clinically important improvement (>0.3 or 0.35 in different studies).
- d. Absolute risk differences calculated from odds ratios obtained using the Bucher method.

Working Group quality of evidence categories:

**High quality: We are very confident that the true effect lies close to that of the estimate of the effect**

**Moderate quality: We are moderately confident in the effect estimate: The true effect is likely to be close to the estimate of the effect, but there is a possibility that it is substantially different**

**Low quality: Our confidence in the effect estimate is limited: The true effect may be substantially different from the estimate of the effect**

**Very low quality: We have very little confidence in the effect estimate: The true effect is likely to be substantially different from the estimate of effect**

## References:

1. Mease PJ, Fleischmann R, Deodhar AA, Wollenhaupt J, Khraishi M, Kielar D, et al. Effect of certolizumab pegol on signs and symptoms in patients with psoriatic arthritis: 24-week results of a Phase 3 double-blind randomised placebo-controlled study (RAPID-PsA). *Ann Rheum Dis.* 2014;73(1):48-55.
2. Gladman D, Fleischmann R, Coteur G, Woltering F, Mease PJ. Effect of certolizumab pegol on multiple facets of psoriatic arthritis as reported by patients: 24-week patient-reported outcome results of a phase III, multicenter study. *Arthritis Care Res (Hoboken).* 2014;66(7):1085-1092.
3. Mease P, Genovese MC, Gladstein G, Kivitz AJ, Ritchlin C, Tak PP, et al. Abatacept in the treatment of patients with psoriatic arthritis: results of a six-month, multicenter, randomized, double-blind, placebo-controlled, phase II trial. *Arthritis Rheum.* 2011;63(4):939-948.
4. Mease PJ, Gottlieb AB, van der Heijde D, FitzGerald O, Johnsen A, Nys M, et al. Efficacy and safety of abatacept, a T-cell modulator, in a randomised, double-blind, placebo-controlled, phase III study in psoriatic arthritis. *Ann Rheum Dis.* 2017.

**PICO 71. In adult patients with active PsA despite treatment with a TNFi monotherapy, what are the benefits and harms of switching to an IL12/23i compared to switching to abatacept?**

Summary: This PICO question was addressed indirectly by four double-blind RCTs. In addition to lack of direct drug comparisons, only 28% to 50% of patients in each study had prior TNFi exposure. Two studies involving PsA patients compared IL12/23i (ustekinumab) to placebo.[1,2] Two studies compared abatacept with placebo in PsA patients.[3,4] Ustekinumab showed statistically significant benefit over placebo for all effectiveness outcomes (ACR20, HAQ-DI, and PASI-75, data not shown), while abatacept showed significant benefit over placebo only for ACR20 (data not shown). For serious infections there were no significant between-group differences, but with very high imprecision due to the low number of events (data not shown).

The adjusted indirect comparison method was used to calculate RRs for IL12/23i vs. abatacept. For ACR20 we also performed this calculation using data only from patients with prior TNFi exposure (two studies reported separate data for these patients). Ustekinumab showed a significant benefit over abatacept for PASI75, but not for other outcomes (all were imprecise, see Table 1).

Quality of evidence across all critical outcomes: Low

| <b>Table 1. IL12/23i compared to abatacept for patients with active PsA despite TNFi</b>               |                     |                      |                      |                      |                         |                                    |                            |                 |                                  |                                     |                                                          |
|--------------------------------------------------------------------------------------------------------|---------------------|----------------------|----------------------|----------------------|-------------------------|------------------------------------|----------------------------|-----------------|----------------------------------|-------------------------------------|----------------------------------------------------------|
| <b>Bibliography: PICO 71: IL12/23i compared to abatacept for patients with active PsA despite TNFi</b> |                     |                      |                      |                      |                         |                                    |                            |                 |                                  |                                     |                                                          |
| <b>Quality assessment</b>                                                                              |                     |                      |                      |                      |                         |                                    | <b>Summary of findings</b> |                 |                                  |                                     |                                                          |
| <b>Nº of participants (studies) Follow-up</b>                                                          | <b>Risk of bias</b> | <b>Inconsistency</b> | <b>Indirectness</b>  | <b>Imprecision</b>   | <b>Publication bias</b> | <b>Overall quality of evidence</b> |                            |                 | <b>Relative effect (95% CI)</b>  | <b>Anticipated absolute effects</b> |                                                          |
|                                                                                                        |                     |                      |                      |                      |                         |                                    | <b>With IL12/23i</b>       | <b>With ABT</b> |                                  | <b>Risk with IL12/23i</b>           | <b>Risk difference with ABT</b>                          |
| <b>ACR20, 12-24 weeks, Bucher adjusted indirect comparison</b>                                         |                     |                      |                      |                      |                         |                                    |                            |                 |                                  |                                     |                                                          |
| 964 (4 RCTs)                                                                                           | Not serious         | Not serious          | Serious <sup>a</sup> | Serious <sup>b</sup> | None                    | ⊕⊕○○<br>LOW                        | IL12/23i                   | ABT             | <b>RR 0.79</b><br>(0.50 to 1.22) | 433 per 1,000 (0.433)               | <b>91 fewer per 1,000 (0.091)</b> (216 fewer to 95 more) |
| <b>ACR20, 12-24 weeks, Bucher adjusted indirect comparison, TNFi-exposed patients</b>                  |                     |                      |                      |                      |                         |                                    |                            |                 |                                  |                                     |                                                          |

**Table 1. IL12/23i compared to abatacept for patients with active PsA despite TNFi**

Bibliography: PICO 71: IL12/23i compared to abatacept for patients with active PsA despite TNFi

| Quality assessment                                                          |             |             |                      |                      |      |                  | Summary of findings |     |                                                            |                          |                                                             |
|-----------------------------------------------------------------------------|-------------|-------------|----------------------|----------------------|------|------------------|---------------------|-----|------------------------------------------------------------|--------------------------|-------------------------------------------------------------|
| 394 (2 RCTs)                                                                | Not serious | Not serious | Serious <sup>a</sup> | Serious <sup>b</sup> | None | ⊕⊕○○<br>LOW      | IL12/23i            | ABT | <b>RR 0.67</b><br>(0.31 to 1.42)                           | 356 per 1,000<br>(0.356) | <b>117 fewer per 1,000 (0.117)</b> (246 fewer to 150 more)  |
| <b>HAQ-DI<sup>c</sup>, 12-24 weeks, Bucher adjusted indirect comparison</b> |             |             |                      |                      |      |                  |                     |     |                                                            |                          |                                                             |
| 755 (4 RCTs)                                                                | Not serious | Not serious | Serious <sup>a</sup> | Serious <sup>b</sup> | None | ⊕⊕○○<br>LOW      | IL12/23i            | ABT | <b>RR 0.72</b><br>(0.36 to 1.47)                           | 389 per 1,000<br>(0.389) | <b>109 fewer per 1,000 (0.109)</b> (249 fewer to 183 more)  |
| <b>PASI 75, 12-24 weeks, Bucher adjusted indirect comparison</b>            |             |             |                      |                      |      |                  |                     |     |                                                            |                          |                                                             |
| 695 (4 RCTs)                                                                | Not serious | Not serious | Serious <sup>a</sup> | Not serious          | None | ⊕⊕⊕○<br>MODERATE | IL12/23i            | ABT | <b>RR 0.16</b><br>(0.06 to 0.42)<br><b>Favors IL12/23i</b> | 531 per 1,000<br>(0.531) | <b>446 fewer per 1,000 (0.446)</b> (499 fewer to 308 fewer) |
| <b>Infection, 12-24 weeks, Bucher adjusted indirect comparison</b>          |             |             |                      |                      |      |                  |                     |     |                                                            |                          |                                                             |
| 735 (2 RCTs)                                                                | Not serious | Not serious | Serious <sup>a</sup> | Serious <sup>b</sup> | None | ⊕⊕○○<br>LOW      | IL12/23i            | ABT | <b>RR 0.80</b><br>(0.48 to 1.33)                           | 271 per 1,000<br>(0.271) | <b>54 fewer per 1,000 (141 fewer to 89 more)</b>            |

CI: Confidence interval; RR: Risk ratio

- a. Indirect comparison, all studies compared drug to placebo, only 50-75% of patients had prior OSM exposure.
- b. Wide 95% CI

- c. HAQ-DI measured as proportion of patients who achieved minimum clinically important improvement (>0.3 or 0.35 in different studies).

Working Group quality of evidence categories:

**High quality: We are very confident that the true effect lies close to that of the estimate of the effect**

**Moderate quality: We are moderately confident in the effect estimate: The true effect is likely to be close to the estimate of the effect, but there is a possibility that it is substantially different**

**Low quality: Our confidence in the effect estimate is limited: The true effect may be substantially different from the estimate of the effect**

**Very low quality: We have very little confidence in the effect estimate: The true effect is likely to be substantially different from the estimate of effect**

### References:

1. Ritchlin C, Rahman P, Kavanaugh A, McInnes IB, Puig L, Li S, et al. Efficacy and safety of the anti-IL-12/23 p40 monoclonal antibody, ustekinumab, in patients with active psoriatic arthritis despite conventional non-biological and biological anti-tumour necrosis factor therapy: 6-month and 1-year results of the phase 3, multicentre, double-blind, placebo-controlled, randomised PSUMMIT 2 trial. *Ann Rheum Dis.* 2014;73(6):990-999.
2. Gottlieb A, Menter A, Mendelsohn A, Shen YK, Li S, Guzzo C, et al. Ustekinumab, a human interleukin 12/23 monoclonal antibody, for psoriatic arthritis: randomised, double-blind, placebo-controlled, crossover trial. *Lancet.* 2009;373(9664):633-640.
3. Mease P, Genovese MC, Gladstein G, Kivitz AJ, Ritchlin C, Tak PP, et al. Abatacept in the treatment of patients with psoriatic arthritis: results of a six-month, multicenter, randomized, double-blind, placebo-controlled, phase II trial. *Arthritis Rheum.* 2011;63(4):939-948.
4. Mease PJ, Gottlieb AB, van der Heijde D, FitzGerald O, Johnsen A, Nys M, et al. Efficacy and safety of abatacept, a T-cell modulator, in a randomised, double-blind, placebo-controlled, phase III study in psoriatic arthritis. *Ann Rheum Dis.* 2017.

**PICO 72. In adult patients with active PsA despite treatment with a TNFi monotherapy, what are the benefits and harms of switching to an IL17i compared to switching to abatacept?**

Summary: This PICO was addressed indirectly by seven double-blind RCTs. In addition to lack of direct drug comparisons, only 29% to 50% of patients in each study had prior TNFi exposure. Two studies involving PsA patients compared Brodalumab to placebo.[1,2] Three studies compared Secukinumab to Placebo in patients with PsA.[3-5] One study compared Ixekizumab to placebo in patients with PsA.[6] Two studies compared abatacept with placebo in PsA patients.[7, 8] IL17i showed statistically significant benefit over placebo for all effectiveness outcomes (ACR20, HAQ-DI, and PASI-75, data not shown), while abatacept showed significant benefit over placebo only for ACR20 (data not shown). For serious infections there were no significant between-group differences, but with very high imprecision due to the low number of events (data not shown).

The adjusted indirect comparison method was used to calculate RRs for IL17i vs. abatacept. For ACR20 we also performed this calculation using data only from patients with prior TNFi exposure (two studies reported separate data for these patients). IL17i showed significant benefit over abatacept for PASI-75 and ACR20, but the additional analysis of ACR20 using only patients with prior TNFi exposure did not show a significant difference between drugs (there was imprecision due to a wide 95% CI). The findings for HAQ-DI and infections were inconclusive due to imprecision in effect estimates.

Quality of evidence across all critical outcomes: Low

| <b>Table 1. IL17i compared to abatacept for patients with active PsA despite TNFi</b><br>Bibliography: PICO 72: IL17i compared to abatacept for patients with active PsA despite TNFi |              |               |              |             |                  |                             |                     |          |                          |                              |                          |
|---------------------------------------------------------------------------------------------------------------------------------------------------------------------------------------|--------------|---------------|--------------|-------------|------------------|-----------------------------|---------------------|----------|--------------------------|------------------------------|--------------------------|
| Quality assessment                                                                                                                                                                    |              |               |              |             |                  |                             | Summary of findings |          |                          |                              |                          |
| Nº of participants (studies)<br>Follow-up                                                                                                                                             | Risk of bias | Inconsistency | Indirectness | Imprecision | Publication bias | Overall quality of evidence |                     |          | Relative effect (95% CI) | Anticipated absolute effects |                          |
|                                                                                                                                                                                       |              |               |              |             |                  |                             | With IL17i          | With ABT |                          | Risk with IL17i              | Risk difference with ABT |
| <b>ACR20, 12-24 weeks, Bucher adjusted indirect comparison</b>                                                                                                                        |              |               |              |             |                  |                             |                     |          |                          |                              |                          |

**Table 1. IL17i compared to abatacept for patients with active PsA despite TNFi**

Bibliography: PICO 72: IL17i compared to abatacept for patients with active PsA despite TNFi

| Quality assessment                                                           |             |             |                      |                      |      |                  | Summary of findings |     |                                                             |                       |                                                                       |
|------------------------------------------------------------------------------|-------------|-------------|----------------------|----------------------|------|------------------|---------------------|-----|-------------------------------------------------------------|-----------------------|-----------------------------------------------------------------------|
| 1254 (6 RCTs)                                                                | Not serious | Not serious | Serious <sup>a</sup> | Not serious          | None | ⊕⊕⊕○<br>MODERATE | IL17i               | ABT | <b>RR 0.66</b><br>(0.46 to 0.97)<br><br><b>Favors IL17i</b> | 479 per 1,000 (0.479) | <b>163 fewer per 1,000 (0.163)</b> (259 fewer to 15 fewer)            |
| <b>ACR20, 12-24 weeks, Bucher adjusted indirect comparison, TNFi-exposed</b> |             |             |                      |                      |      |                  |                     |     |                                                             |                       |                                                                       |
| 293 (2 RCTs)                                                                 | Not serious | Not serious | Serious <sup>a</sup> | Serious <sup>b</sup> | None | ⊕⊕○○<br>LOW      | IL17i               | ABT | <b>RR 0.73</b><br>(0.37 to 1.43)                            | 354 per 1,000 (0.354) | <b>96 fewer per 1,000 (0.096)</b> (223 fewer to 152 more)             |
| <b>HAQ-DI<sup>c</sup>, 12-24 weeks, Bucher adjusted indirect comparison</b>  |             |             |                      |                      |      |                  |                     |     |                                                             |                       |                                                                       |
| 942 (5 RCTs)                                                                 | Not serious | Not serious | Serious <sup>a</sup> | Serious <sup>b</sup> | None | ⊕⊕○○<br>LOW      | IL17i               | ABT | <b>RR 1.20</b><br>(0.64 to 2.25)                            | 545 per 1,000 (0.545) | <b>36 more per 1,000 (0.036)</b> (175 fewer to 367 more) <sup>d</sup> |
| <b>PASI 75, 12-24 weeks, Bucher adjusted indirect comparison</b>             |             |             |                      |                      |      |                  |                     |     |                                                             |                       |                                                                       |
| 865 (6 RCTs)                                                                 | Not serious | Not serious | Serious <sup>a</sup> | Not serious          | None | ⊕⊕⊕○<br>MODERATE | IL17i               | ABT | <b>RR 0.21</b><br>(0.07 to 0.60)<br><br><b>Favors IL17i</b> | 594 per 1,000 (0.594) | <b>469 fewer per 1,000 (0.469)</b> (552 fewer to 238 fewer)           |

**Table 1. IL17i compared to abatacept for patients with active PsA despite TNFi**

Bibliography: PICO 72: IL17i compared to abatacept for patients with active PsA despite TNFi

| Quality assessment                                                 |             |             |                      |                      |      |             | Summary of findings |     |                                  |                       |                                                            |
|--------------------------------------------------------------------|-------------|-------------|----------------------|----------------------|------|-------------|---------------------|-----|----------------------------------|-----------------------|------------------------------------------------------------|
| <b>Infection, 12-24 weeks, Bucher adjusted indirect comparison</b> |             |             |                      |                      |      |             |                     |     |                                  |                       |                                                            |
| 1026 (3 RCTs)                                                      | Not serious | Not serious | Serious <sup>a</sup> | Serious <sup>b</sup> | None | ⊕⊕○○<br>LOW | IL17i               | ABT | <b>RR 0.74</b><br>(0.46 to 1.20) | 321 per 1,000 (0.321) | <b>83 fewer per 1,000</b><br>(0.083)(173 fewer to 64 more) |

CI: Confidence interval; RR: Risk ratio

- a. Indirect comparison, all studies compared drug to placebo, only 50-75% of patients had prior OSM exposure.
- b. Wide 95% CI
- c. HAQ-DI measured as proportion of patients who achieved minimum clinically important improvement (>0.3 or 0.35 in different studies).
- d. Absolute risk differences calculated from odds ratios obtained using the Bucher method.

Working Group quality of evidence categories:

**High quality: We are very confident that the true effect lies close to that of the estimate of the effect**

**Moderate quality: We are moderately confident in the effect estimate: The true effect is likely to be close to the estimate of the effect, but there is a possibility that it is substantially different**

**Low quality: Our confidence in the effect estimate is limited: The true effect may be substantially different from the estimate of the effect**

**Very low quality: We have very little confidence in the effect estimate: The true effect is likely to be substantially different from the estimate of effect**

#### References:

1. McInnes IB, Mease PJ, Kirkham B, Kavanaugh A, Ritchlin CT, Rahman P, et al. Secukinumab, a human anti-interleukin-17A monoclonal antibody, in patients with psoriatic arthritis (FUTURE 2): a randomised, double-blind, placebo-controlled, phase 3 trial. *Lancet*. 2015;386(9999):1137-1146.
2. Mease PJ, McInnes IB, Kirkham B, Kavanaugh A, Rahman P, van der Heijde D, et al. Secukinumab Inhibition of Interleukin-17A in Patients with Psoriatic Arthritis. *N Engl J Med*. 2015;373(14):1329-1339.
3. Mease PJ, Genovese MC, Greenwald MW, Ritchlin CT, Beaulieu AD, Deodhar A, et al. Brodalumab, an anti-IL17RA monoclonal antibody, in psoriatic arthritis. *N Engl J Med*. 2014;370(24):2295-2306.
4. Papp K, Menter A, Strober B, Kricorian G, Thompson EH, Milmont CE, et al. Efficacy and safety of brodalumab in subpopulations of patients with difficult-to-treat moderate-to-severe plaque psoriasis. *J Am Acad Dermatol*. 2015;72(3):436-439 e431.



5. McInnes IB, Sieper J, Braun J, Emery P, van der Heijde D, Isaacs JD, et al. Efficacy and safety of secukinumab, a fully human anti-interleukin-17A monoclonal antibody, in patients with moderate-to-severe psoriatic arthritis: a 24-week, randomised, double-blind, placebo-controlled, phase II proof-of-concept trial. *Ann Rheum Dis.* 2014;73(2):349-356.
6. Nash P, Kirkham B, Okada M, Rahman P, Combe B, Burmester G, Adams DH, Kerr L, Lee C, Shuler CL, Genovese M on behalf of the SPIRIT-P2 Study Group. Ixekizumab for the treatment of patients with active psoriatic arthritis and an inadequate response to tumour necrosis factor inhibitors: results from the 24-week randomised, double-blind, placebo-controlled period of the SPIRIT-P2 phase 3 trial. *Lancet* 2017; 389:2317-2327.
7. Mease P, Genovese MC, Gladstein G, Kivitz AJ, Ritchlin C, Tak PP, et al. Abatacept in the treatment of patients with psoriatic arthritis: results of a six-month, multicenter, randomized, double-blind, placebo-controlled, phase II trial. *Arthritis Rheum.* 2011;63(4):939-948.
8. Mease PJ, Gottlieb AB, van der Heijde D, FitzGerald O, Johnsen A, Nys M, et al. Efficacy and safety of abatacept, a T-cell modulator, in a randomised, double-blind, placebo-controlled, phase III study in psoriatic arthritis. *Ann Rheum Dis.* 2017.

**PICO 73. In adult patients with active PsA despite treatment with an OSM, what are the benefits and harms of switching to a TNFi compared to switching to tofacitinib?**

Summary: Ten placebo controlled RCTs (13 publications) indirectly addressed this PICO question. Nine studies (12 publications) compared TNFi versus placebo in PsA patients.[1-12] One study that pooled data from two psoriasis RCTs compared tofacitinib (5 mg twice daily) to placebo in a subgroup of patients with PsA.[13] The only relevant outcome presented in this study was PASI-75, so this is the only outcome that was compared between TNFi and tofacitinib. Statistically significant differences favored TNFi over placebo and tofacitinib over placebo for this outcome (data not shown). An adjusted indirect comparison found no significant difference in PASI-75 between TNFi and tofacitinib, but the finding was imprecise due to a wide CI that overlapped with the line of no effect (Table 1).

A search update in March 2018 identified two new RCTs comparing tofacitinib to placebo in patients with PsA.[14,15] The guideline panel had previously reviewed these studies in abstract form when formulating recommendations. Only one of the trials (Mease et al.[14]) enrolled a population of patients with prior OSM treatment but no prior TNFi exposure. This study also had a comparison arm of patients receiving adalimumab. At 3 months, tofacitinib showed significant benefit over placebo for ACR 20, HAQ-DI, and PASI 75, and no significant difference between tofacitinib and adalimumab for these outcomes. The tofacitinib versus placebo comparison is moderate quality due to indirectness, and the tofacitinib versus adalimumab comparison is moderate quality due to imprecision. These trials do not change the imprecision in the adjusted indirect comparisons and do not alter the overall quality of evidence.

Quality of evidence across all critical outcomes: Low

| <b>Table 1. TNFi compared to tofacitinib for patients with active PsA despite OSM</b><br>Bibliography: PICO 73: TNFi compared to tofacitinib for patients with active PsA despite OSM |              |               |              |             |                  |                             |                     |          |                          |                              |                          |
|---------------------------------------------------------------------------------------------------------------------------------------------------------------------------------------|--------------|---------------|--------------|-------------|------------------|-----------------------------|---------------------|----------|--------------------------|------------------------------|--------------------------|
| Quality assessment                                                                                                                                                                    |              |               |              |             |                  |                             | Summary of findings |          |                          |                              |                          |
| Nº of participants (studies)<br>Follow-up                                                                                                                                             | Risk of bias | Inconsistency | Indirectness | Imprecision | Publication bias | Overall quality of evidence |                     |          | Relative effect (95% CI) | Anticipated absolute effects |                          |
|                                                                                                                                                                                       |              |               |              |             |                  |                             | With TNFi           | With TOF |                          | Risk with TNFi               | Risk difference with TOF |
| <b>PASI 75, 12-24 weeks, Bucher adjusted indirect comparison</b>                                                                                                                      |              |               |              |             |                  |                             |                     |          |                          |                              |                          |

**Table 1. TNFi compared to tofacitinib for patients with active PsA despite OSM**

Bibliography: PICO 73: TNFi compared to tofacitinib for patients with active PsA despite OSM

| Quality assessment |             |             |                      |                      |      |             | Summary of findings |     |                                  |                          |                                                                                   |
|--------------------|-------------|-------------|----------------------|----------------------|------|-------------|---------------------|-----|----------------------------------|--------------------------|-----------------------------------------------------------------------------------|
| 10 RCTs            | Not serious | Not serious | Serious <sup>a</sup> | Serious <sup>b</sup> | None | ⊕⊕○○<br>LOW | TNFi                | TOF | <b>RR 0.90</b><br>(0.28 to 2.92) | 494 per 1,000<br>(0.494) | <b>113 fewer per 1,000</b><br><b>(0.113)</b> (352 fewer to 199 more) <sup>c</sup> |

**CI:** Confidence interval; **RR:** Risk ratio

- Indirect comparison, all studies compared drug to placebo, only 50-75% of patients had prior OSM exposure.
- Wide 95% CI
- Absolute risk differences calculated from odds ratios obtained using the Bucher method.

Working Group quality of evidence categories:

**High quality:** We are very confident that the true effect lies close to that of the estimate of the effect

**Moderate quality:** We are moderately confident in the effect estimate: The true effect is likely to be close to the estimate of the effect, but there is a possibility that it is substantially different

**Low quality:** Our confidence in the effect estimate is limited: The true effect may be substantially different from the estimate of the effect

**Very low quality:** We have very little confidence in the effect estimate: The true effect is likely to be substantially different from the estimate of effect

#### References:

- Mease PJ, Fleischmann R, Deodhar AA, Wollenhaupt J, Khraishi M, Kielar D, et al. Effect of certolizumab pegol on signs and symptoms in patients with psoriatic arthritis: 24-week results of a Phase 3 double-blind randomised placebo-controlled study (RAPID-PsA). *Ann Rheum Dis.* 2014;73(1):48-55.
- Gladman D, Fleischmann R, Coteur G, Woltering F, Mease PJ. Effect of certolizumab pegol on multiple facets of psoriatic arthritis as reported by patients: 24-week patient-reported outcome results of a phase III, multicenter study. *Arthritis Care Res (Hoboken).* 2014;66(7):1085-1092.
- Genovese MC, Mease PJ, Thomson GT, Kivitz AJ, Perdok RJ, Weinberg MA, et al. Safety and efficacy of adalimumab in treatment of patients with psoriatic arthritis who had failed disease modifying antirheumatic drug therapy. *J Rheumatol.* 2007;34(5):1040-1050.
- Mease PJ, Gladman DD, Ritchlin CT, Ruderman EM, Steinfeld SD, Choy EH, et al. Adalimumab for the treatment of patients with moderately to severely active psoriatic arthritis: results of a double-blind, randomized, placebo-controlled trial. *Arthritis Rheum.* 2005;52(10):3279-3289.

5. Gladman DD, Mease PJ, Cifaldi MA, Perdok RJ, Sasso E, Medich J. Adalimumab improves joint-related and skin-related functional impairment in patients with psoriatic arthritis: patient-reported outcomes of the Adalimumab Effectiveness in Psoriatic Arthritis Trial. *Ann Rheum Dis.* 2007;66(2):163-168.
6. Mease PJ, Kivitz AJ, Burch FX, Siegel EL, Cohen SB, Ory P, et al. Etanercept treatment of psoriatic arthritis: safety, efficacy, and effect on disease progression. *Arthritis Rheum.* 2004;50(7):2264-2272.
7. Mease PJ, Woolley JM, Singh A, Tsuji W, Dunn M, Chiou CF. Patient-reported outcomes in a randomized trial of etanercept in psoriatic arthritis. *J Rheumatol.* 2010;37(6):1221-1227.
8. Antoni C, Krueger GG, de Vlam K, Birbara C, Beutler A, Guzzo C, et al. Infliximab improves signs and symptoms of psoriatic arthritis: results of the IMPACT 2 trial. *Ann Rheum Dis.* 2005;64(8):1150-1157.
9. Mease PJ, Goffe BS, Metz J, VanderStoep A, Finck B, Burge DJ. Etanercept in the treatment of psoriatic arthritis and psoriasis: a randomised trial. *Lancet.* 2000;356(9227):385-390.
10. Kavanaugh A, McInnes I, Mease P, Krueger GG, Gladman D, Gomez-Reino J, et al. Golimumab, a new human tumor necrosis factor alpha antibody, administered every four weeks as a subcutaneous injection in psoriatic arthritis: Twenty-four-week efficacy and safety results of a randomized, placebo-controlled study. *Arthritis Rheum.* 2009;60(4):976-986.
11. Antoni CE, Kavanaugh A, Kirkham B, Tutuncu Z, Burmester GR, Schneider U, et al. Sustained benefits of infliximab therapy for dermatologic and articular manifestations of psoriatic arthritis: results from the infliximab multinational psoriatic arthritis controlled trial (IMPACT). *Arthritis Rheum.* 2005;52(4):1227-1236.
12. Torii H, Nakagawa H, Japanese Infliximab Study i. Infliximab monotherapy in Japanese patients with moderate-to-severe plaque psoriasis and psoriatic arthritis. A randomized, double-blind, placebo-controlled multicenter trial. *J Dermatol Sci.* 2010;59(1):40-49.
13. Menter MA, Papp KA, Cather J, Leonardi C, Pariser DM, Krueger JG, et al. Efficacy of Tofacitinib for the Treatment of Moderate-to-Severe Chronic Plaque Psoriasis in Patient Subgroups from Two Randomised Phase 3 Trials. *J Drugs Dermatol.* 2016;15(5):568-580.
14. Mease P, Hall S, Fitzgerald O, van der Heijde D, Merola JF, Avila-Zapata F, et al. Tofacitinib or adalimumab versus placebo for psoriatic arthritis. *NEJM.* 2017;377(16):1537-1550.
15. Gladman D, Rigby W, Azevedo VF, Behrens F, Blanco R, Kaszuba A, et al. Tofacitinib for psoriatic arthritis in patients with an inadequate response to TNF inhibitors. *NEJM.* 2017;377(16):1525-1536.

**PICO 74. In adult patients with active PsA despite treatment with an OSM, what are the benefits and harms of switching to an IL12/23i compared to switching to tofacitinib?**

Summary: Four placebo-controlled RCTs indirectly addressed this PICO question. Three studies compared IL 12/23 (ustekinumab) with placebo in PsA patients.[1-3] One study that pooled data from two psoriasis RCTs compared tofacitinib (5 mg twice daily) to placebo in a subgroup of patients with PsA.[4] The only relevant outcome presented in this study was PASI-75, so this is the only outcome that was compared between ustekinumab and tofacitinib. Statistically significant differences favored ustekinumab over placebo and tofacitinib over placebo for this outcome (data not shown). An adjusted indirect comparison found no significant difference in PASI-75 between IL12/23i and tofacitinib, but the finding was imprecise due to a wide CI that overlapped with the line of no effect (Table 1).

A search update in March 2018 identified two new RCTs comparing tofacitinib to placebo in patients with PsA.[5,6] The guideline panel had previously reviewed these studies in abstract form when formulating recommendations. Only one of the trials (Mease et al.[5]) enrolled a population of patients with prior OSM treatment but no prior TNFi exposure. Tofacitinib showed significant benefit over placebo for ACR 20, HAQ-DI, and PASI 75. The tofacitinib versus placebo comparison is moderate quality due to indirectness. These trials do not change the imprecision in the adjusted indirect comparisons and do not alter the overall quality of evidence.

Quality of evidence across all critical outcomes: Low

| <b>Table 1. IL12/23i compared to tofacitinib for patients with active PsA despite OSM</b>               |                     |                      |                      |                      |                         |                                    |                            |                 |                                  |                                     |                                                                        |
|---------------------------------------------------------------------------------------------------------|---------------------|----------------------|----------------------|----------------------|-------------------------|------------------------------------|----------------------------|-----------------|----------------------------------|-------------------------------------|------------------------------------------------------------------------|
| <b>Bibliography: PICO 74: IL12/23i compared to tofacitinib for patients with active PsA despite OSM</b> |                     |                      |                      |                      |                         |                                    |                            |                 |                                  |                                     |                                                                        |
| <b>Quality assessment</b>                                                                               |                     |                      |                      |                      |                         |                                    | <b>Summary of findings</b> |                 |                                  |                                     |                                                                        |
| <b>Nº of participants (studies)<br/>Follow-up</b>                                                       | <b>Risk of bias</b> | <b>Inconsistency</b> | <b>Indirectness</b>  | <b>Imprecision</b>   | <b>Publication bias</b> | <b>Overall quality of evidence</b> |                            |                 | <b>Relative effect (95% CI)</b>  | <b>Anticipated absolute effects</b> |                                                                        |
|                                                                                                         |                     |                      |                      |                      |                         |                                    | <b>With IL12/23i</b>       | <b>With TOF</b> |                                  | <b>Risk with IL12/23i</b>           | <b>Risk difference with TOF</b>                                        |
| <b>PASI 75, 12-24 weeks, Bucher adjusted indirect comparison</b>                                        |                     |                      |                      |                      |                         |                                    |                            |                 |                                  |                                     |                                                                        |
| 4 RCTs                                                                                                  | Not serious         | Not serious          | Serious <sup>a</sup> | Serious <sup>b</sup> | None                    | ⊕⊕○○<br>LOW                        | IL12/23i                   | TOF             | <b>OR 0.84</b><br>(0.27 to 2.65) | 569 per 1,000                       | <b>43 fewer per 1,000 (0.043)</b> (306 fewer to 209 more) <sup>c</sup> |

**CI:** Confidence interval; **OR:** Odds ratio

- a. Indirect comparison, all studies compared drug to placebo, only 50-75% of patients had prior OSM exposure.
- b. Wide 95% CI
- c. Absolute risk differences calculated from odds ratios obtained using the Bucher method.

Working Group quality of evidence categories:

**High quality: We are very confident that the true effect lies close to that of the estimate of the effect**

**Moderate quality: We are moderately confident in the effect estimate: The true effect is likely to be close to the estimate of the effect, but there is a possibility that it is substantially different**

**Low quality: Our confidence in the effect estimate is limited: The true effect may be substantially different from the estimate of the effect**

**Very low quality: We have very little confidence in the effect estimate: The true effect is likely to be substantially different from the estimate of effect**

## References:

1. McInnes IB, Kavanaugh A, Gottlieb AB, Puig L, Rahman P, Ritchlin C, et al. Efficacy and safety of ustekinumab in patients with active psoriatic arthritis: 1 year results of the phase 3, multicentre, double-blind, placebo-controlled PSUMMIT 1 trial. *Lancet*. 2013;382(9894):780-789.
2. Gottlieb A, Menter A, Mendelsohn A, Shen YK, Li S, Guzzo C, et al. Ustekinumab, a human interleukin 12/23 monoclonal antibody, for psoriatic arthritis: randomised, double-blind, placebo-controlled, crossover trial. *Lancet*. 2009;373(9664):633-640.
3. Ritchlin C, Rahman P, Kavanaugh A, McInnes IB, Puig L, Li S, et al. Efficacy and safety of the anti-IL-12/23 p40 monoclonal antibody, ustekinumab, in patients with active psoriatic arthritis despite conventional non-biological and biological anti-tumour necrosis factor therapy: 6-month and 1-year results of the phase 3, multicentre, double-blind, placebo-controlled, randomised PSUMMIT 2 trial. *Ann Rheum Dis*. 2014;73(6):990-999.
4. Menter MA, Papp KA, Cather J, Leonardi C, Pariser DM, Krueger JG, et al. Efficacy of Tofacitinib for the Treatment of Moderate-to-Severe Chronic Plaque Psoriasis in Patient Subgroups from Two Randomised Phase 3 Trials. *J Drugs Dermatol*. 2016;15(5):568-580.
5. Mease P, Hall S, Fitzgerald O, van der Heijde D, Merola JF, Avila-Zapata F, et al. Tofacitinib or adalimumab versus placebo for psoriatic arthritis. *NEJM*. 2017;377(16):1537-1550.
6. Gladman D, Rigby W, Azevedo VF, Behrens F, Blanco R, Kaszuba A, et al. Tofacitinib for psoriatic arthritis in patients with an inadequate response to TNF inhibitors. *NEJM*. 2017;377(16):1525-1536.

**PICO 75. In adult patients with active PsA despite treatment with an OSM, what are the benefits and harms of switching to an IL17i compared to switching to tofacitinib?**

Summary: Nine placebo-controlled RCTs indirectly addressed this PICO question. Seven studies compared IL17i to placebo: One study compared ixekizumab to placebo,[1] three studies compared secukinumab to placebo,[2-4] and three studies compared brodalumab to placebo[5-7] (note: brodalumab is currently FDA-approved for psoriasis but not PsA). One study that pooled data from two psoriasis RCTs compared tofacitinib (5 mg twice daily) to placebo in a subgroup of patients with PsA.[8] The only relevant outcome presented in this study was PASI-75, so this is the only outcome that was compared between IL17i and tofacitinib. Statistically significant differences favored IL17i over placebo and tofacitinib over placebo for this outcome (data not shown). An adjusted indirect comparison found no significant difference in PASI-75 between IL17i and tofacitinib, but the finding was imprecise due to a wide CI that overlapped with the line of no effect (Table 1).

A search update in March 2018 identified two new RCTs comparing tofacitinib to placebo in patients with PsA.[9,10] The guideline panel had previously reviewed these studies in abstract form when formulating recommendations. Only one of the trials (Mease et al.[9]) enrolled a population of patients with prior OSM treatment but no prior TNFi exposure. Tofacitinib showed significant benefit over placebo for ACR 20, HAQ-DI, and PASI 75. The tofacitinib versus placebo comparison is moderate quality due to indirectness. These trials do not change the imprecision in the adjusted indirect comparisons and do not alter the overall quality of evidence.

Quality of evidence across all critical outcomes: Low

| <b>Table 1. IL17i compared to tofacitinib for patients with active PsA despite OSM</b>        |              |               |              |             |                  |                             |                     |          |                          |                              |                          |
|-----------------------------------------------------------------------------------------------|--------------|---------------|--------------|-------------|------------------|-----------------------------|---------------------|----------|--------------------------|------------------------------|--------------------------|
| Bibliography: PICO 75: IL17i compared to tofacitinib for patients with active PsA despite OSM |              |               |              |             |                  |                             |                     |          |                          |                              |                          |
| Quality assessment                                                                            |              |               |              |             |                  |                             | Summary of findings |          |                          |                              |                          |
| No of participants (studies)<br>Follow-up                                                     | Risk of bias | Inconsistency | Indirectness | Imprecision | Publication bias | Overall quality of evidence |                     |          | Relative effect (95% CI) | Anticipated absolute effects |                          |
|                                                                                               |              |               |              |             |                  |                             | With IL17i          | With TOF |                          | Risk with IL17i              | Risk difference with TOF |
| <b>PASI 75, 12-24 weeks, Bucher adjusted indirect comparison</b>                              |              |               |              |             |                  |                             |                     |          |                          |                              |                          |

**Table 1. IL17i compared to tofacitinib for patients with active PsA despite OSM**

Bibliography: PICO 75: IL17i compared to tofacitinib for patients with active PsA despite OSM

| Quality assessment |             |             |                      |                      |      |             | Summary of findings |     |                                  |                          |                                                                                   |
|--------------------|-------------|-------------|----------------------|----------------------|------|-------------|---------------------|-----|----------------------------------|--------------------------|-----------------------------------------------------------------------------------|
| 9 RCTs             | Not serious | Not serious | Serious <sup>a</sup> | Serious <sup>b</sup> | None | ⊕⊕○○<br>LOW | IL17i               | TOF | <b>OR 0.52</b><br>(0.15 to 1.85) | 643 per 1,000<br>(0.643) | <b>159 fewer per 1,000</b><br><b>(0.159)</b> (430 fewer to 126 more) <sup>c</sup> |

CI: Confidence interval; OR: Odds ratio

- Indirect comparison, all studies compared drug to placebo, only 50-75% of patients had prior OSM exposure.
- Wide 95% CI
- Absolute risk differences calculated from odds ratios obtained using the Bucher method.

Working Group quality of evidence categories:

**High quality: We are very confident that the true effect lies close to that of the estimate of the effect**

**Moderate quality: We are moderately confident in the effect estimate: The true effect is likely to be close to the estimate of the effect, but there is a possibility that it is substantially different**

**Low quality: Our confidence in the effect estimate is limited: The true effect may be substantially different from the estimate of the effect**

**Very low quality: We have very little confidence in the effect estimate: The true effect is likely to be substantially different from the estimate of effect**

#### References:

- Mease PJ, van der Heijde D, Ritchlin CT, Okada M, Cuchacovich RS, Shuler CL, et al. Ixekizumab, an interleukin-17A specific monoclonal antibody, for the treatment of biologic-naive patients with active psoriatic arthritis: results from the 24-week randomised, double-blind, placebo-controlled and active (adalimumab)-controlled period of the phase III trial SPIRIT-P1. *Ann Rheum Dis.* 2017;76(1):79-87.
- McInnes IB, Mease PJ, Kirkham B, Kavanaugh A, Ritchlin CT, Rahman P, et al. Secukinumab, a human anti-interleukin-17A monoclonal antibody, in patients with psoriatic arthritis (FUTURE 2): a randomised, double-blind, placebo-controlled, phase 3 trial. *Lancet.* 2015;386(9999):1137-1146.
- McInnes IB, Sieper J, Braun J, Emery P, van der Heijde D, Isaacs JD, et al. Efficacy and safety of secukinumab, a fully human anti-interleukin-17A monoclonal antibody, in patients with moderate-to-severe psoriatic arthritis: a 24-week, randomised, double-blind, placebo-controlled, phase II proof-of-concept trial. *Ann Rheum Dis.* 2014;73(2):349-356.
- Mease PJ, McInnes IB, Kirkham B, Kavanaugh A, Rahman P, van der Heijde D, et al. Secukinumab Inhibition of Interleukin-17A in Patients with Psoriatic Arthritis. *N Engl J Med.* 2015;373(14):1329-1339.



5. Mease PJ, Genovese MC, Greenwald MW, Ritchlin CT, Beaulieu AD, Deodhar A, et al. Brodalumab, an anti-IL17RA monoclonal antibody, in psoriatic arthritis. *N Engl J Med*. 2014;370(24):2295-2306.
6. Nakagawa H, Niino H, Ootaki K, Japanese brodalumab study g. Brodalumab, a human anti-interleukin-17-receptor antibody in the treatment of Japanese patients with moderate-to-severe plaque psoriasis: Efficacy and safety results from a phase II randomized controlled study. *J Dermatol Sci*. 2016;81(1):44-52.
7. Papp K, Menter A, Strober B, Kricorian G, Thompson EH, Milmont CE, et al. Efficacy and safety of brodalumab in subpopulations of patients with difficult-to-treat moderate-to-severe plaque psoriasis. *J Am Acad Dermatol*. 2015;72(3):436-439 e431.
8. Menter MA, Papp KA, Cather J, Leonardi C, Pariser DM, Krueger JG, et al. Efficacy of Tofacitinib for the Treatment of Moderate-to-Severe Chronic Plaque Psoriasis in Patient Subgroups from Two Randomised Phase 3 Trials. *J Drugs Dermatol*. 2016;15(5):568-580.
9. Mease P, Hall S, Fitzgerald O, van der Heijde D, Merola JF, Avila-Zapata F, et al. Tofacitinib or adalimumab versus placebo for psoriatic arthritis. *NEJM*. 2017;377(16):1537-1550.
10. Gladman D, Rigby W, Azevedo VF, Behrens F, Blanco R, Kaszuba A, et al. Tofacitinib for psoriatic arthritis in patients with an inadequate response to TNF inhibitors. *NEJM*. 2017;377(16):1525-1536.

**PICO 76. In adult patients with active PsA despite treatment with a TNFi monotherapy, what are the benefits and harms of switching to a second TNFi compared to switching to tofacitinib?**

Summary: See summary for PICO 73. The available tofacitinib study did not separately report data for patients with prior TNFi exposure, and did not report the percentage of patients with PsA who had prior TNFi exposure (the percentage with prior biologic exposure was 26% for the overall population of patients with psoriasis), so the comparison in PICO 73 can be used as indirect evidence. In the main population of patients with psoriasis the findings did not differ for biologic-naïve and biologic-exposed patients.

A search update in March 2018 identified two new RCTs comparing tofacitinib to placebo in patients with PsA.[1,2] The guideline panel had previously reviewed these studies in abstract form when formulating recommendations. Only one of the trials (Gladman et al.[2]) enrolled a population of patients with prior TNFi exposure. At 3 months, tofacitinib showed significant benefit over placebo for ACR 20 and HAQ-DI; only the 10 mg dose showed significant benefit over placebo for PASI 75. This new evidence is moderate quality due to indirectness, does not change the imprecision in the adjusted indirect comparisons and therefore does not alter the overall quality of evidence.

Quality of evidence across all critical outcomes: Low

**References:**

1. Mease P, Hall S, Fitzgerald O, van der Heijde D, Merola JF, Avila-Zapata F, et al. Tofacitinib or adalimumab versus placebo for psoriatic arthritis. NEJM. 2017;377(16):1537-1550.
2. Gladman D, Rigby W, Azevedo VF, Behrens F, Blanco R, Kaszuba A, et al. Tofacitinib for psoriatic arthritis in patients with an inadequate response to TNF inhibitors. NEJM. 2017;377(16):1525-1536.

**PICO 77. In adult patients with active PsA despite treatment with a TNFi monotherapy, what are the benefits and harms of switching to an IL12/23i compared to switching to tofacitinib?**

Summary: See summary for PICO 74, with explanation in PICO 76.

Quality of evidence across all critical outcomes: Low

**PICO 78. In adult patients with active PsA despite treatment with a TNFi monotherapy, what are the benefits and harms of switching to an IL17i compared to switching to tofacitinib?**

Summary: : See summary for PICO 75, with explanation in PICO 76.

Quality of evidence across all critical outcomes: Low

## Bibliography

- Abu-Shakra, M., D. D. Gladman, J. C. Thorne, J. Long, J. Gough and V. T. Farewell (1995). "Longterm methotrexate therapy in psoriatic arthritis: clinical and radiological outcome." J Rheumatol 22(2): 241-245.
- Al-Mutairi, N. and T. Nour (2014). "The effect of weight reduction on treatment outcomes in obese patients with psoriasis on biologic therapy: a randomized controlled prospective trial." Expert Opin Biol Ther 14(6): 749-756.
- Anthonisen NR, Skeans MA, Wise RA, Manfreda J, Kanner RE, Connett JE; Lung Health Study Research Group. The effects of a smoking cessation intervention on 14.5-year mortality: a randomized clinical trial. Arthritis Care & Res 2010; 62(7): 984–992. Ann Intern Med. 2005 Feb 15;142(4):233-9.
- Antoni, C., G. G. Krueger, K. de Vlam, C. Birbara, A. Beutler, C. Guzzo, B. Zhou, L. T. Dooley, A. Kavanaugh and I. T. Investigators (2005). "Infliximab improves signs and symptoms of psoriatic arthritis: results of the IMPACT 2 trial." Ann Rheum Dis 64(8): 1150-1157.
- Antoni, C. E., A. Kavanaugh, B. Kirkham, Z. Tutuncu, G. R. Burmester, U. Schneider, D. E. Furst, J. Molitor, E. Keystone, D. Gladman, B. Manger, S. Wassenberg, R. Weier, D. J. Wallace, M. H. Weisman, J. R. Kalden and J. Smolen (2005). "Sustained benefits of infliximab therapy for dermatologic and articular manifestations of psoriatic arthritis: results from the infliximab multinational psoriatic arthritis controlled trial (IMPACT)." Arthritis Rheum 52(4): 1227-1236.
- Bachelez, H., P. C. van de Kerkhof, R. Strohal, A. Kubanov, F. Valenzuela, J. H. Lee, V. Yakusevich, S. Chimenti, J. Papacharalambous, J. Proulx, P. Gupta, H. Tan, M. Tawadrous, H. Valdez, R. Wolk and O. P. T. C. Investigators (2015). "Tofacitinib versus etanercept or placebo in moderate-to-severe chronic plaque psoriasis: a phase 3 randomised non-inferiority trial." Lancet 386(9993): 552-561.
- Baillet A, Zeboulon N, Gossec L, Combescurie C, Bodin LA, Juvin R, et al. Efficacy of cardiorespiratory aerobic exercise in rheumatoid arthritis: meta-analysis of randomized controlled trials Arthritis Care & Res 2010; 62(7): 984–992.
- Baranauskaite, A., H. Raffayova, N. V. Kungurov, A. Kubanova, A. Venalis, L. Helmle, S. Srinivasan, E. Nasonov, N. Vastesaegeer and R. investigators (2012). "Infliximab plus methotrexate is superior to methotrexate alone in the treatment of psoriatic arthritis in methotrexate-naive patients: the RESPOND study." Ann Rheum Dis 71(4): 541-548.
- Barker, J., M. Hoffmann, G. Wozel, J. P. Ortonne, H. Zheng, H. van Hoogstraten and K. Reich (2011). "Efficacy and safety of infliximab vs. methotrexate in patients with moderate-to-severe plaque psoriasis: results of an open-label, active-controlled, randomized trial (RESTORE1)." Br J Dermatol 165(5): 1109-1117.
- Coates, L. C., A. R. Moverley, L. McParland, S. Brown, N. Navarro-Coy, J. L. O'Dwyer, D. M. Meads, P. Emery, P. G. Conaghan and P. S. Helliwell (2015). "Effect of tight control of inflammation in early psoriatic arthritis (TICOPA): a UK multicentre, open-label, randomised controlled trial." Lancet 386(10012): 2489-2498.
- Combe, B., F. Behrens, N. McHugh, F. Brock, U. Kerkmann, B. Kola and G. Gallo (2016). "Comparison of Etanercept Monotherapy and Combination Therapy with Methotrexate in Psoriatic Arthritis: Results from 2 Clinical Trials." J Rheumatol 43(6): 1063-1067.

Combe, B., P. Goupille, J. L. Kuntz, J. Tebib, F. Liote and C. Bregeon (1996). "Sulphasalazine in psoriatic arthritis: a randomized, multicentre, placebo-controlled study." Br J Rheumatol 35(7): 664-668.

Cutolo, M., G. E. Myerson, R. M. Fleischmann, F. Liote, F. Diaz-Gonzalez, F. Van den Bosch, H. Marzo-Ortega, E. Feist, K. Shah, C. Hu, R. M. Stevens and A. Poder (2016). "A Phase III, Randomized, Controlled Trial of Apremilast in Patients with Psoriatic Arthritis: Results of the PALACE 2 Trial." J Rheumatol 43(9): 1724-1734.

Di Minno, M. N., R. Peluso, S. Iervolino, A. Russolillo, R. Lupoli, R. Scarpa and R. S. G. Ca (2014). "Weight loss and achievement of minimal disease activity in patients with psoriatic arthritis starting treatment with tumour necrosis factor alpha blockers." Ann Rheum Dis 73(6): 1157-1162.

Eder, L., A. Thavaneswaran, V. Chandran and D. D. Gladman (2014). "Tumour necrosis factor alpha blockers are more effective than methotrexate in the inhibition of radiographic joint damage progression among patients with psoriatic arthritis." Ann Rheum Dis 73(6): 1007-1011.

Edwards, C. J., F. J. Blanco, J. Crowley, C. A. Birbara, J. Jaworski, J. Aelion, R. M. Stevens, A. Vessey, X. Zhan and P. Bird (2016). "Apremilast, an oral phosphodiesterase 4 inhibitor, in patients with psoriatic arthritis and current skin involvement: a phase III, randomised, controlled trial (PALACE 3)." Ann Rheum Dis 75(6): 1065-1073.

Elkayam, O., A. Bashkin, M. Mandelboim, I. Litinsky, D. Comaheshter, D. Levartovsky, E. Mendelson, I. Wigler, D. Caspi and D. Paran (2010). "The effect of infliximab and timing of vaccination on the humoral response to influenza vaccination in patients with rheumatoid arthritis and ankylosing spondylitis." Semin Arthritis Rheum 39(6): 442-447.

Fagerli, K. M., E. Lie, D. van der Heijde, M. S. Heiberg, A. S. Lexberg, E. Rodevand, S. Kalstad, K. Mikkelsen and T. K. Kvien (2014). "The role of methotrexate co-medication in TNF-inhibitor treatment in patients with psoriatic arthritis: results from 440 patients included in the NOR-DMARD study." Ann Rheum Dis 73(1): 132-137.

Farr, M., G. D. Kitis, L. Waterhouse, R. Jubb, D. Felix-Davies and P. A. Bacon (1990). "Sulphasalazine in psoriatic arthritis: a double-blind placebo-controlled study." Br J Rheumatol 29(1): 46-49.

Franca, I. L., A. C. Ribeiro, N. E. Aikawa, C. G. Saad, J. C. Moraes, C. Goldstein-Schainberg, I. M. Laurindo, A. R. Precioso, M. A. Ishida, A. M. Sartori, C. A. Silva and E. Bonfa (2012). "TNF blockers show distinct patterns of immune response to the pandemic influenza A H1N1 vaccine in inflammatory arthritis patients." Rheumatology (Oxford) 51(11): 2091-2098.

Fraser, A. D., A. W. van Kuijk, R. Westhovens, Z. Karim, R. Wakefield, A. H. Gerards, R. Landewe, S. D. Steinfeld, P. Emery, B. A. Dijkmans and D. J. Veale (2005). "A randomised, double blind, placebo controlled, multicentre trial of combination therapy with methotrexate plus ciclosporin in patients with active psoriatic arthritis." Ann Rheum Dis 64(6): 859-864.

Genovese, M. C., P. J. Mease, G. T. Thomson, A. J. Kivitz, R. J. Perdok, M. A. Weinberg, J. Medich, E. H. Sasso and M. S. Group (2007). "Safety and efficacy of adalimumab in treatment of patients with psoriatic arthritis who had failed disease modifying antirheumatic drug therapy." J Rheumatol 34(5): 1040-1050.

Gisondi, P., M. Del Giglio, V. Di Francesco, M. Zamboni and G. Girolomoni (2008). "Weight loss improves the response of obese patients with moderate-to-severe chronic plaque psoriasis to low-dose cyclosporine therapy: a randomized, controlled, investigator-blinded clinical trial." Am J Clin Nutr 88(5): 1242-1247.

Gladman D, Rigby W, Azevedo VF, Behrens F, Blanco R, Kaszuba A, et al. Tofacitinib for psoriatic arthritis in patients with an inadequate response to TNF inhibitors. *NEJM*. 2017;377(16):1525-1536.

Gladman, D., R. Fleischmann, G. Coteur, F. Woltering and P. J. Mease (2014). "Effect of certolizumab pegol on multiple facets of psoriatic arthritis as reported by patients: 24-week patient-reported outcome results of a phase III, multicenter study." Arthritis Care Res (Hoboken) 66(7): 1085-1092.

Gladman, D. D., P. J. Mease, M. A. Cifaldi, R. J. Perdok, E. Sasso and J. Medich (2007). "Adalimumab improves joint-related and skin-related functional impairment in patients with psoriatic arthritis: patient-reported outcomes of the Adalimumab Effectiveness in Psoriatic Arthritis Trial." Ann Rheum Dis 66(2): 163-168.

Gottlieb, A., A. Menter, A. Mendelsohn, Y. K. Shen, S. Li, C. Guzzo, S. Fretzin, R. Kunynetz and A. Kavanaugh (2009). "Ustekinumab, a human interleukin 12/23 monoclonal antibody, for psoriatic arthritis: randomised, double-blind, placebo-controlled, crossover trial." Lancet 373(9664): 633-640.

Gottlieb, A. B., R. G. Langley, S. Philipp, B. Sigurgeirsson, A. Blauvelt, R. Martin, C. Papavassilis and S. Mpfu (2015). "Secukinumab Improves Physical Function in Subjects With Plaque Psoriasis and Psoriatic Arthritis: Results from Two Randomized, Phase 3 Trials." J Drugs Dermatol 14(8): 821-833.

Gottlieb, A. B., R. G. Langley, B. E. Strober, K. A. Papp, P. Klekotka, K. Creamer, E. H. Thompson, M. Hooper and G. Kricorian (2012). "A randomized, double-blind, placebo-controlled study to evaluate the addition of methotrexate to etanercept in patients with moderate to severe plaque psoriasis." Br J Dermatol 167(3): 649-657.

Griffiths, C. E., K. Reich, M. Lebwohl, P. van de Kerkhof, C. Paul, A. Menter, G. S. Cameron, J. Erickson, L. Zhang, R. J. Secrest, S. Ball, D. K. Braun, O. O. Osuntokun, M. P. Heffernan, B. J. Nickoloff, K. Papp, Uncover and U.-. investigators (2015). "Comparison of ixekizumab with etanercept or placebo in moderate-to-severe psoriasis (UNCOVER-2 and UNCOVER-3): results from two phase 3 randomised trials." Lancet 386(9993): 541-551.

Griffiths, C. E., B. E. Strober, P. van de Kerkhof, V. Ho, R. Fidelus-Gort, N. Yeilding, C. Guzzo, Y. Xia, B. Zhou, S. Li, L. T. Dooley, N. H. Goldstein, A. Menter and A. S. Group (2010). "Comparison of ustekinumab and etanercept for moderate-to-severe psoriasis." N Engl J Med 362(2): 118-128.

Gupta, A. K., D. Daigle and D. C. Lyons (2014). "Network Meta-analysis of Treatments for Chronic Plaque Psoriasis in Canada." J Cutan Med Surg 18(6): 371-378.

Gupta, A. K., J. S. Grober, T. A. Hamilton, C. N. Ellis, M. T. Siegel, J. J. Voorhees and W. J. McCune (1995). "Sulfasalazine therapy for psoriatic arthritis: a double blind, placebo controlled trial." J Rheumatol 22(5): 894-898.

Heiberg, M. S., C. Kaufmann, E. Rodevand, K. Mikkelsen, W. Koldingsnes, P. Mowinckel and T. K. Kvien (2007). "The comparative effectiveness of anti-TNF therapy and methotrexate in patients with psoriatic arthritis: 6 month results from a longitudinal, observational, multicentre study." Ann Rheum Dis 66(8): 1038-1042.

Hueber W, Sands BE, Lewitzky S, Vandemeulebroecke M, Reinisch W, Higgins PDR, et al. Secukinumab, a human anti-IL-17A monoclonal antibody, for moderate to severe Crohn's disease: unexpected results of a randomised, double-blind, placebo-controlled trial. *Gut* 2012;61:1693–1700.

Kaine, J. L., A. J. Kivitz, C. Birbara and A. Y. Luo (2007). "Immune responses following administration of influenza and pneumococcal vaccines to patients with rheumatoid arthritis receiving adalimumab." *J Rheumatol* 34(2): 272-279.

Kaltwasser, J. P., P. Nash, D. Gladman, C. F. Rosen, F. Behrens, P. Jones, J. Wollenhaupt, F. G. Falk, P. Mease and G. Treatment of Psoriatic Arthritis Study (2004). "Efficacy and safety of leflunomide in the treatment of psoriatic arthritis and psoriasis: a multinational, double-blind, randomized, placebo-controlled clinical trial." *Arthritis Rheum* 50(6): 1939-1950.

Karanikolas, G. N., E. M. Koukli, A. Katsalira, A. Arida, D. Petrou, E. Komninou, K. Fragiadaki, A. Zacharioudaki, I. Lasithiotakis, E. Giavri, G. Vaiopoulos and P. P. Sfikakis (2011). "Adalimumab or cyclosporine as monotherapy and in combination in severe psoriatic arthritis: results from a prospective 12-month nonrandomized unblinded clinical trial." *J Rheumatol* 38(11): 2466-2474.

Kavanaugh, A., I. McInnes, P. Mease, G. G. Krueger, D. Gladman, J. Gomez-Reino, K. Papp, J. Zrubek, S. Mudivarthy, M. Mack, S. Visvanathan and A. Beutler (2009). "Golimumab, a new human tumor necrosis factor alpha antibody, administered every four weeks as a subcutaneous injection in psoriatic arthritis: Twenty-four-week efficacy and safety results of a randomized, placebo-controlled study." *Arthritis Rheum* 60(4): 976-986.

Kavanaugh, A., P. J. Mease, J. J. Gomez-Reino, A. O. Adebajo, J. Wollenhaupt, D. D. Gladman, M. Hochfeld, L. L. Teng, G. Schett, E. Lespessailles and S. Hall (2015). "Longterm (52-week) results of a phase III randomized, controlled trial of apremilast in patients with psoriatic arthritis." *J Rheumatol* 42(3): 479-488.

Kavanaugh, A., P. J. Mease, J. J. Gomez-Reino, A. O. Adebajo, J. Wollenhaupt, D. D. Gladman, E. Lespessailles, S. Hall, M. Hochfeld, C. Hu, D. Hough, R. M. Stevens and G. Schett (2014). "Treatment of psoriatic arthritis in a phase 3 randomised, placebo-controlled trial with apremilast, an oral phosphodiesterase 4 inhibitor." *Ann Rheum Dis* 73(6): 1020-1026.

Kavanaugh A, Husni ME, Harrison DD, Kim L, Lo KH, Leu JH, Hsia EC. Safety and efficacy of intravenous golimumab in patients with active psoriatic arthritis. *Arth Rheum*. 2017;69(11):2151-2161.

Kingsley, G. H., A. Kowalczyk, H. Taylor, F. Ibrahim, J. C. Packham, N. J. McHugh, D. M. Mulherin, G. D. Kitis, K. Chakravarty, B. D. Tom, A. G. O'Keefe, P. J. Maddison and D. L. Scott (2012). "A randomized placebo-controlled trial of methotrexate in psoriatic arthritis." *Rheumatology (Oxford)* 51(8): 1368-1377.

Kivitz, A. J., J. Schechtman, M. Texter, A. Fichtner, M. de Longueville and E. K. Chartash (2014). "Vaccine responses in patients with rheumatoid arthritis treated with certolizumab pegol: results from a single-blind randomized phase IV trial." *J Rheumatol* 41(4): 648-657.

Knittle K, Maes S, De Gucht V. Psychological interventions for rheumatoid arthritis: examining the role of self-regulation with a systematic review and meta-analysis of randomized controlled trials. *Arth Care & Res*. 2010; 62:1460-72.

Langley, R. G., B. E. Elewski, M. Lebwohl, K. Reich, C. E. Griffiths, K. Papp, L. Puig, H. Nakagawa, L. Spelman, B. Sigurgeirsson, E. Rivas, T. F. Tsai, N. Wasel, S. Tyring, T. Salko, I. Hampele, M. Notter, A. Karpov, S. Helou, C. Papavassilis, E. S. Group and F. S. Group (2014). "Secukinumab in plaque psoriasis--results of two phase 3 trials." *N Engl J Med* 371(4): 326-338.

Lebwohl, M., B. Strober, A. Menter, K. Gordon, J. Weglowska, L. Puig, K. Papp, L. Spelman, D. Toth, F. Kerdel, A. W. Armstrong, G. Stingl, A. B. Kimball, H. Bachelez, J. J. Wu, J. Crowley, R. G. Langley, T. Blicharski, C. Paul, J. P. Lacour, S. Tyring, L. Kircik, S. Chimenti, K. Callis Duffin, J. Bagel, J. Koo, G. Aras, J. Li, W. Song, C. E. Milmont, Y. Shi, N. Erondur, P. Klekotka, B. Kotzin and A. Nirula (2015). "Phase 3 Studies Comparing Brodalumab with Ustekinumab in Psoriasis." *N Engl J Med* 373(14): 1318-1328.

McInnes, I. B., A. Kavanaugh, A. B. Gottlieb, L. Puig, P. Rahman, C. Ritchlin, C. Brodmerkel, S. Li, Y. Wang, A. M. Mendelsohn, M. K. Doyle and P. S. Group (2013). "Efficacy and safety of ustekinumab in patients with active psoriatic arthritis: 1 year results of the phase 3, multicentre, double-blind, placebo-controlled PSUMMIT 1 trial." *Lancet* 382(9894): 780-789.

McInnes, I. B., P. J. Mease, B. Kirkham, A. Kavanaugh, C. T. Ritchlin, P. Rahman, D. van der Heijde, R. Landewe, P. G. Conaghan, A. B. Gottlieb, H. Richards, L. Pricop, G. Ligozio, M. Patekar, S. Mpofo and F. S. Group (2015). "Secukinumab, a human anti-interleukin-17A monoclonal antibody, in patients with psoriatic arthritis (FUTURE 2): a randomised, double-blind, placebo-controlled, phase 3 trial." *Lancet* 386(9999): 1137-1146.

McInnes, I. B., J. Sieper, J. Braun, P. Emery, D. van der Heijde, J. D. Isaacs, G. Dahmen, J. Wollenhaupt, H. Schulze-Koops, J. Kogan, S. Ma, M. M. Schumacher, A. P. Bertolino, W. Hueber and P. P. Tak (2014). "Efficacy and safety of secukinumab, a fully human anti-interleukin-17A monoclonal antibody, in patients with moderate-to-severe psoriatic arthritis: a 24-week, randomised, double-blind, placebo-controlled, phase II proof-of-concept trial." *Ann Rheum Dis* 73(2): 349-356.

Malatjalian D et al. Methotrexate hepatotoxicity in psoriatics: Report of 104 patients from Nova Scotia, with analysis of risks from obesity, diabetes and alcohol consumption during long term follow-up. *Can J Gastroenterol* 1996;10(6):369-375.

Manyanga T. et al. Pain management with acupuncture in osteoarthritis: a systematic review and meta-analysis. *BMC Complementary and Alternative Medicine* 2014, 14:312

Mease P, Hall S, Fitzgerald O, van der Heijde D, Merola JF, Avila-Zapata F, et al. Tofacitinib or adalimumab versus placebo for psoriatic arthritis. *NEJM*. 2017;377(16):1537-1550.

Mease, P. J., R. Fleischmann, A. A. Deodhar, J. Wollenhaupt, M. Khraishi, D. Kielar, F. Woltering, C. Stach, B. Hoepken, T. Arledge and D. van der Heijde (2014). "Effect of certolizumab pegol on signs and symptoms in patients with psoriatic arthritis: 24-week results of a Phase 3 double-blind randomised placebo-controlled study (RAPID-PsA)." *Ann Rheum Dis* 73(1): 48-55.

Mease, P. J., M. C. Genovese, M. W. Greenwald, C. T. Ritchlin, A. D. Beaulieu, A. Deodhar, R. Newmark, J. Feng, N. Erondur and A. Nirula (2014). "Brodalumab, an anti-IL17RA monoclonal antibody, in psoriatic arthritis." *N Engl J Med* 370(24): 2295-2306.

Mease P, M.C. Genovese, G. Gladstein, A.J. Kivitz, C. Ritchlin, P.P. Tak, et al. Abatacept in the treatment of patients with psoriatic arthritis: results of a six-month, multicenter, randomized, double-blind, placebo-controlled, phase II trial. *Arthritis Rheum*. 2011;63(4):939-948.

Mease, P. J., D. D. Gladman, C. T. Ritchlin, E. M. Ruderman, S. D. Steinfeld, E. H. Choy, J. T. Sharp, P. A. Ory, R. J. Perdok, M. A. Weinberg. Adalimumab Effectiveness in Psoriatic Arthritis Trial Study (2005). "Adalimumab for the treatment of patients with moderately to severely active psoriatic arthritis: results of a double-blind, randomized, placebo-controlled trial." *Arthritis Rheum* 52(10): 3279-3289.

Mease, P. J., B. S. Goffe, J. Metz, A. VanderStoep, B. Finck and D. J. Burge (2000). "Etanercept in the treatment of psoriatic arthritis and psoriasis: a randomised trial." Lancet 356(9227): 385-390.

Mease PJ, A.B. Gottlieb, D. van der Heijde, O. FitzGerald, A. Johnsen, M. Nys, et al. Efficacy and safety of abatacept, a T-cell modulator, in a randomised, double-blind, placebo-controlled, phase III study in psoriatic arthritis. Ann Rheum Dis. 2017.

Mease, P. J., A. J. Kivitz, F. X. Burch, E. L. Siegel, S. B. Cohen, P. Ory, D. Salonen, J. Rubenstein, J. T. Sharp and W. Tsuji (2004). "Etanercept treatment of psoriatic arthritis: safety, efficacy, and effect on disease progression." Arthritis Rheum 50(7): 2264-2272.

Mease, P. J., I. B. McInnes, B. Kirkham, A. Kavanaugh, P. Rahman, D. van der Heijde, R. Landewe, P. Nash, L. Pricop, J. Yuan, H. B. Richards, S. Mpofo and F. S. Group (2015). "Secukinumab Inhibition of Interleukin-17A in Patients with Psoriatic Arthritis." N Engl J Med 373(14): 1329-1339.

Mease, P. J., D. van der Heijde, C. T. Ritchlin, M. Okada, R. S. Cuchacovich, C. L. Shuler, C. Y. Lin, D. K. Braun, C. H. Lee, D. D. Gladman and S.-P. S. Group (2017). "Ixekizumab, an interleukin-17A specific monoclonal antibody, for the treatment of biologic-naive patients with active psoriatic arthritis: results from the 24-week randomised, double-blind, placebo-controlled and active (adalimumab)-controlled period of the phase III trial SPIRIT-P1." Ann Rheum Dis 76(1): 79-87.

Mease, P. J., J. M. Woolley, A. Singh, W. Tsuji, M. Dunn and C. F. Chiou. Patient-reported outcomes in a randomized trial of etanercept in psoriatic arthritis. J Rheumatol 2010 37(6): 1221-1227.

Mease PJ, Ritchlin CT, Martin RW, Gottlieb AB, Baumgartner SW, Burge DJ, Whitmore JB. Pneumococcal vaccine response in psoriatic arthritis patients during treatment with etanercept. J Rheumatol. 2004 Jul;31(7):1356-61.

Menter MA, Papp KA, Cather J, Leonardi C, Pariser DM, Krueger JG, et al. Efficacy of Tofacitinib for the Treatment of Moderate-to-Severe Chronic Plaque Psoriasis in Patient Subgroups from Two Randomised Phase 3 Trials. J Drugs Dermatol. 2016;15(5):568-580.

Migita, K., Y. Akeda, M. Akazawa, S. Tohma, F. Hirano, H. Ideguchi, H. Kozuru, Y. Jiuchi, R. Matsumura, E. Suematsu, T. Miyamura, S. Mori, T. Fukui, Y. Izumi, N. Iwanaga, H. Tsutani, K. Saisyo, T. Yamanaka, S. Ohshima, N. Mori, A. Matsumori, K. Takahi, S. Yoshizawa, Y. Kawabe, Y. Suenaga, T. Ozawa, N. Hamada, Y. Komiya, T. Matsui, H. Furukawa and K. Oishi. Effect of abatacept on the immunogenicity of 23-valent pneumococcal polysaccharide vaccination (PPSV23) in rheumatoid arthritis patients. Arthritis Res Ther 2015 17: 357.

Mons U, Müezziner A, Gellert C, Schöttker B, Abnet CC, Bobak M, et al. Impact of smoking and smoking cessation on cardiovascular events and mortality among older adults: meta-analysis of individual participant data from prospective cohort studies of the CHANCES consortium. BMJ. 2015 Apr 20;350:h1551.

Nakagawa, H., H. Niiro, K. Ootaki and Japanese Brodalumab Study Group (2016). "Brodalumab, a human anti-interleukin-17-receptor antibody in the treatment of Japanese patients with moderate-to-severe plaque psoriasis: Efficacy and safety results from a phase II randomized controlled study." J Dermatol Sci 81(1): 44-52.

Narula, N., J. K. Marshall, J. F. Colombel, G. I. Leontiadis, J. G. Williams, Z. Muqtadir and W. Reinisch (2016). "Systematic Review and Meta-Analysis: Infliximab or Cyclosporine as Rescue Therapy in Patients With Severe Ulcerative Colitis Refractory to Steroids." Am J Gastroenterol 111(4): 477-491.



Nash, P., D. Thaci, F. Behrens, F. Falk and J. P. Kaltwasser (2006). "Leflunomide improves psoriasis in patients with psoriatic arthritis: an in-depth analysis of data from the TOPAS study." Dermatology 212(3): 238-249.

Nash P, Kirkham B, Okada M, Rahman P, Combe B, Burmester G, Adams DH, Kerr L, Lee C, Shuler CL, Genovese M on behalf of the SPIRIT-P2 Study Group. Ixekizumab for the treatment of patients with active psoriatic arthritis and an inadequate response to tumour necrosis factor inhibitors: results from the 24-week randomised, double-blind, placebo-controlled period of the SPIRIT-P2 phase 3 trial. *Lancet* 2017; 389:2317-2327.

Nelson L., Churilla J. Massage Therapy for Pain and Function in Patients with Arthritis. A Systematic Review of Randomized Controlled Trials. Am J Phys Med Rehabil 2017;00:00–00.

Papp, K., A. Menter, B. Strober, G. Kricorian, E. H. Thompson, C. E. Milmont, A. Nirula and P. Klekotka (2015). "Efficacy and safety of brodalumab in subpopulations of patients with difficult-to-treat moderate-to-severe plaque psoriasis." J Am Acad Dermatol 72(3): 436-439 e431.

Reich K, M. Gooderham, L. Green, A. Bewley, Z. Zhang, I. Khanskaya, et al. The efficacy and safety of apremilast, etanercept and placebo in patients with moderate-to-severe plaque psoriasis: 52-week results from a phase IIIb, randomized, placebo-controlled trial (LIBERATE). *J Eur Acad Dermatol Venereol.* 2017;31(3):507-517.

Ribeiro, A. C., I. M. Laurindo, L. K. Guedes, C. G. Saad, J. C. Moraes, C. A. Silva and E. Bonfa (2013). "Abatacept and reduced immune response to pandemic 2009 influenza A/H1N1 vaccination in patients with rheumatoid arthritis." Arthritis Care Res (Hoboken) 65(3): 476-480.

Ritchlin, C., P. Rahman, A. Kavanaugh, I. B. McInnes, L. Puig, S. Li, Y. Wang, Y. K. Shen, M. K. Doyle, A. M. Mendelsohn, A. B. Gottlieb and P. S. Group (2014). "Efficacy and safety of the anti-IL-12/23 p40 monoclonal antibody, ustekinumab, in patients with active psoriatic arthritis despite conventional non-biological and biological anti-tumour necrosis factor therapy: 6-month and 1-year results of the phase 3, multicentre, double-blind, placebo-controlled, randomised PSUMMIT 2 trial." Ann Rheum Dis 73(6): 990-999.

Roger-Silva D, Natour J. Moreira E, Jennings F. A resistance exercise program improves functional capacity of patients with psoriatic arthritis: a randomized controlled trial. *Clin Rheumatol* 2018; 37: 389-395.

Rosenberg P et al. Psoriasis patients with diabetes type 2 are at high risk of developing liver fibrosis during methotrexate treatment. *Journal of Hepatology* 46 (2007) 1111–1118

Rungapiromnan W, Z. Z. N. Yiu, R.B. Warren, C. E. M. Griffiths, D. M. Ashcroft. Impact of biologic therapies on risk of major adverse cardiovascular events in patients with psoriasis: systematic review and meta-analysis of randomized controlled trials. *Br J Dermatol.* 2017;176(4):890-901.

Sandborn WJ, Hanauer SB, Katz S, Safdi M, Wolf DG, Baerg RD, et al. Etanercept for active Crohn's disease: a randomized, double-blind, placebo-controlled trial. *Gastroenterology.* 2001 Nov;121(5):1088-94.

Saurat, J. H., G. Stingl, L. Dubertret, K. Papp, R. G. Langley, J. P. Ortonne, K. Unnebrink, M. Kaul, A. Camez and C. S. Investigators (2008). "Efficacy and safety results from the randomized controlled comparative study of adalimumab vs. methotrexate vs. placebo in patients with psoriasis (CHAMPION)." Br J Dermatol 158(3): 558-566.

Schett, G., J. Wollenhaupt, K. Papp, R. Joos, J. F. Rodrigues, A. R. Vessey, C. Hu, R. Stevens and K. L. de Vlam (2012). "Oral apremilast in the treatment of active psoriatic arthritis: results of a multicenter, randomized, double-blind, placebo-controlled study." Arthritis Rheum 64(10): 3156-3167.

Siegel S, Tencza M, Apodaca B, Poole J. Effectiveness of occupational therapy interventions for adults with rheumatoid arthritis: a systematic review. Am J Occ Ther. 2017; 71:1-11.

Stidham RW, Lee TC, Higgins PD, Deshpande AR, Sussman DA, Singal AG, et al.. Systematic review with network meta-analysis: the efficacy of anti-TNF agents for the treatment of Crohn's disease. Aliment Pharmacol Ther. 2014 Jun;39(12):1349-62.

Stidham RW, Lee TC, Higgins PD, Deshpande AR, Sussman DA, Singal AG, et al. Systematic review with network meta-analysis: the efficacy of anti-tumour necrosis factor-alpha agents for the treatment of ulcerative colitis. Aliment Pharmacol Ther. 2014 Apr;39(7):660-71.

Strand, V., G. Schett, C. Hu and R. M. Stevens (2013). "Patient-reported Health-related Quality of Life with apremilast for psoriatic arthritis: a phase II, randomized, controlled study." J Rheumatol 40(7): 1158-1165.

Thaci, D., A. Blauvelt, K. Reich, T. F. Tsai, F. Vanaclocha, K. Kingo, M. Ziv, A. Pinter, S. Hugot, R. You and M. Milutinovic (2015). "Secukinumab is superior to ustekinumab in clearing skin of subjects with moderate to severe plaque psoriasis: CLEAR, a randomized controlled trial." J Am Acad Dermatol 73(3): 400-409.

Torii, H., H. Nakagawa and Japanese Infliximab Study Investigators (2010). "Infliximab monotherapy in Japanese patients with moderate-to-severe plaque psoriasis and psoriatic arthritis. A randomized, double-blind, placebo-controlled multicenter trial." J Dermatol Sci 59(1): 40-49.

Yun, H, F Xie, E. Delzell, E.B. Levitan, L. Chen, J.D. Lewis, K.G.Saag, T. Beukelman, K. L. Winthrop, J. W. Baddley and J.R. Curtis (2016). "Comparative risk of hospitalized infection associated with biologic agents in rheumatoid arthritis patients enrolled in Medicare." Arth Rheumatol 68(1):56-66.

Zachariae, C., N. J. Mork, T. Reunala, H. Lorentzen, E. Falk, S. L. Karvonen, A. Johannesson, B. Clareus, L. Skov, G. Mork, S. Walker and S. Qvitzau (2008). "The combination of etanercept and methotrexate increases the effectiveness of treatment in active psoriasis despite inadequate effect of methotrexate therapy." Acta Derm Venereol 88(5): 495-501.

Zhang J, Xie F, Delzell E, Chen L, Winthrop K, Lewis JD, et al.. Association between Vaccination for Herpes Zoster and Risk of Herpes Zoster Infection among Older Patients with Selected Immune-mediated Diseases. JAMA. 2012 July 4; 308(1): 43-49.
